# Supplementary material for: Identification of benzochromene derivatives as a highly specific NorA efflux pump inhibitor to mitigate the drug resistant strains of S. aureus
Source: Royal Society of Chemistry journal article supplement (doi:10.1039/c6ra01981a), 2016-01-01
Supplement: c6ra01981a1.pdf [file c6ra01981a1.pdf]

**Identification of Benzochromen derivatives as a highly specific Nor A efflux pump inhibitor to mitigate drug resistant strains of *S.aureus***

Asaithampi Ganesan<sup>a</sup> \$, Lawrence Rene Christena<sup>a</sup> \$, Himesh Makala Venkata Subbarao<sup>a</sup> b, Ulaganathan Venkatasubramanian<sup>ab</sup>, Raman Thiagarajan<sup>a</sup> b, Venkatabalasubramanian Sivaramakrishnan<sup>a</sup>, Kabilan Kasilingam<sup>a</sup>, Nagarajan Saisubramanian<sup>ab</sup>\* Subramaniapillai Selva Ganesan<sup>a</sup>\*

<sup>a</sup> **School of Chemical and Biotechnology, SASTRA University, Thanjavur, Tamil Nadu, India**

<sup>b</sup> Centre for Research in Infectious Diseases (CRID), School of Chemical & Biotechnology, SASTRA University, Thanjavur, Tamil Nadu- 613401

\$ both the authors have contributed equally for the work

\* Jointly communicated

**Corresponding Authors**

**Dr. N.Saisubramanian**, School of Chemical and Biotechnology, SASTRA University, Thanjavur, Tamil Nadu, India. Ph :+91 4362 24101; Fax: +91 4362 264120; [sai@scbt.sastra.edu](mailto:sai@scbt.sastra.edu)

**Dr. S. Selva Ganesan**, School of Chemical and Biotechnology, SASTRA University, Thanjavur, Tamil Nadu, India. Ph :+91 4362 24101; Fax: +91 4362 264120; [selva@biotech.sastra.edu](mailto:selva@biotech.sastra.edu);

## Experimental Section

### General

All the chemicals were purchased from Sigma Aldrich, Loba chemicals, Merck, Avra synthesis, and SD Fine chemicals and all used without any other further purification. Melting points were taken in the microscopic melting point meter and were uncorrected. Subsequently  $^1\text{H-NMR}$  (300 MHz) and  $^{13}\text{C-NMR}$  (75 MHz) were recorded by a Bruker Av-300MHz spectrometer.  $^{13}\text{C-NMR}$  (100 MHz) for cyclic ketone derivatives were recorded by a Bruker 400MHz spectrometer. All the reactions were conducted to the 10 ML round bottom flask with a magnetic stirrer. Both PEI-Bz and PEI-Me are prepared by previously reported procedure.<sup>1</sup> Hyperbranched polyamine with number average molecular weight ( $M_n$ ) 1200 was chosen for studies. The number of primary ( $1^\circ$ ), secondary ( $2^\circ$ ), tertiary ( $3^\circ$ ) amine group present in the hyperbranched polyamine is calculate based on inverted-gate  $^{13}\text{C-NMR}$  spectroscopy as shown below (Figure S1).

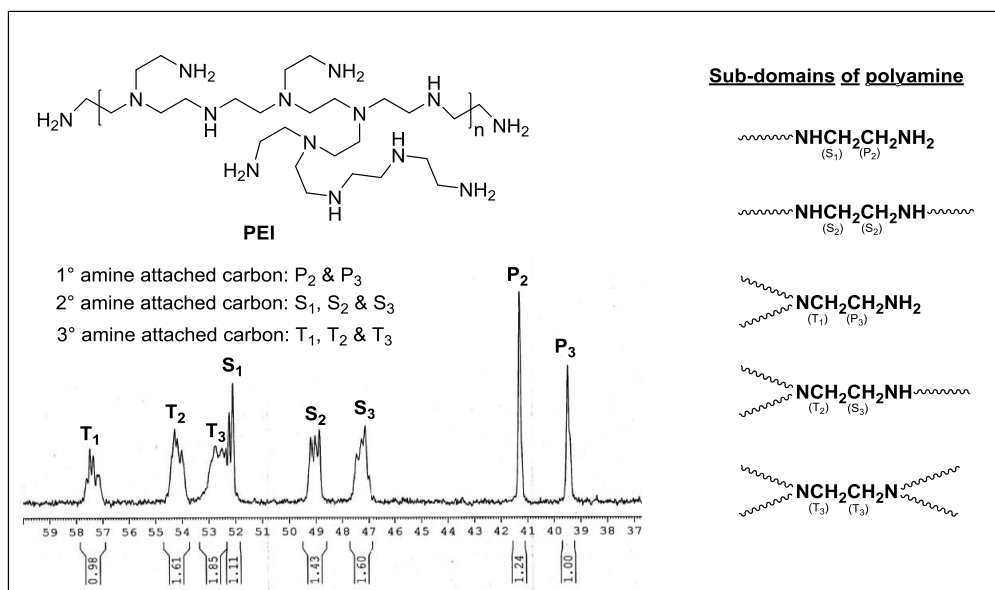

**Figure S1:** Sub-domains in Polyamine and the corresponding NMR signals

$$1^\circ : 2^\circ : 3^\circ = I_{(P_2+P_3)} : I_{(S_1+S_2+S_3)}/2 : I_{(T_1+T_2+T_3)}/3$$

$$= 2.24 : 2.07 : 1.48$$

$$\text{Polyamine} = \{[(\text{CH}_2)\text{NH}_2]_{2.24}[(\text{CH}_2)_2\text{NH}]_{2.07}[(\text{CH}_2)_3\text{N}]_{1.48}\}_n$$

Average Empirical Wt = mass of  $[(\text{CH}_2)\text{NH}_2] \times 2.24 +$   
mass of  $[(\text{CH}_2)_2\text{NH}] \times 2.07 +$   
mass of  $[(\text{CH}_2)_3\text{N}] \times 1.48$   
 $= 30.03(2.24) + 43.04(2.07) + 56.05(1.48)$   
 $= 239.3$

Average Molecular Wt = 1200

Multiplication factor =  $1200/239.3$   
 $= 5.015$

Average number of  $1^\circ$  amine =  $2.24 \times 5.015 = 11.23$   
Average number of  $2^\circ$  amine =  $2.07 \times 5.015 = 10.38$   
Average number of  $3^\circ$  amine =  $1.48 \times 5.015 = 7.42$

**Chart S1:** Calculation of number of amine functionalities

The ratio of  $1^\circ$ ,  $2^\circ$  and  $3^\circ$  amine functionalities in PEI is calculated from the peak intensities of inverted-gate  $^{13}\text{C}$  NMR and the obtained value for the ratio of  $1^\circ$ ,  $2^\circ$  and  $3^\circ$  amine is 2.24:2.07:1.48 (Chart S1).<sup>2</sup> Based on the ratio of three different amine functionalities, we have deduced the number of amine moieties present in the hyperbranched polyamines (Chart S1). The whole polyamine molecule can be sub-grouped to  $(\text{CH}_2)\text{NH}_2$ ,  $(\text{CH}_2)_2\text{NH}$  and  $(\text{CH}_2)_3\text{N}$  units. A molecular formula of  $\{[(\text{CH}_2)\text{NH}_2]_x[(\text{CH}_2)_2\text{NH}]_y[(\text{CH}_2)_3\text{N}]_z\}_n$  defines the whole polymer molecule. The values x, y and z are the ratio of  $1^\circ$ ,  $2^\circ$  and  $3^\circ$  amine functionalities, respectively and n being an arbitrary value. Based on NMR peak intensities of inverted-gate  $^{13}\text{C}$  NMR, an empirical formula of  $[(\text{CH}_2)\text{NH}_2]_{2.24}[(\text{CH}_2)_2\text{NH}]_{2.07}[(\text{CH}_2)_3\text{NH}]_{1.48}$  is deduced. The average empirical weight is 239.3 (calculated from the empirical formula). The average molecular weight of hyperbranched polyamine chosen is 1200, hence the multiplication factor value (n) is 5.015. Multiplying the ratio of  $1^\circ$ ,  $2^\circ$  and  $3^\circ$  amine functionality with multiplication factor gives the number of three types of amine functionalities ( $1^\circ$ ,  $2^\circ$  and  $3^\circ$ ) as 11.23, 10.38 and 7.42 respectively.

The screening of reaction conditions for the synthesis of benzochromenes was given in the following table. The PEI-Me exhibited excellent catalytic potential compared to other polyamine derivatives.

**Table S1: Optimization of reaction condition for benzochromenes derivatives<sup>a</sup>**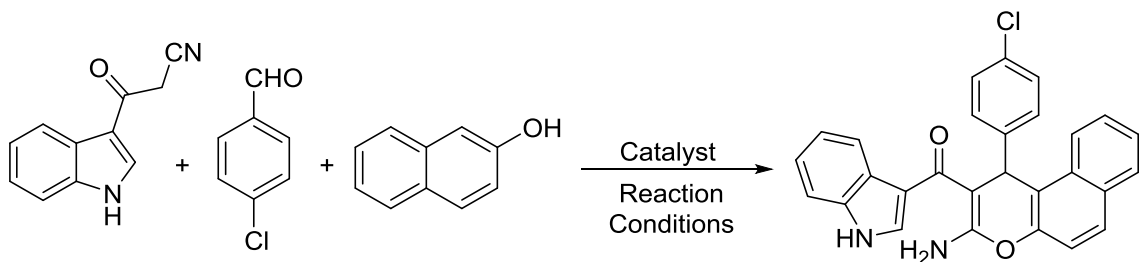

| Entry                | Catalyst                        | Solvent (ml)       | Temp.(°C) | Time (h)   | Yield (%) <sup>b</sup> |
|----------------------|---------------------------------|--------------------|-----------|------------|------------------------|
| 1 <sup>c</sup>       | PEI-Me                          | EtOH               | 80        | 3.0        | 46                     |
| 2 <sup>c</sup>       | PEI-Me                          | MeOH               | r.t.      | 24         | No reaction            |
| 3 <sup>c</sup>       | PEI-Me                          | MeOH               | 60        | 7.0        | 67                     |
| <b>4<sup>c</sup></b> | <b>PEI-Me</b>                   | <b>MeOH</b>        | <b>80</b> | <b>1.5</b> | <b>90</b>              |
| 5 <sup>c</sup>       | PEI-Me                          | THF                | 80        | 1.5        | 30                     |
| 6 <sup>c</sup>       | PEI-Me                          | CH <sub>3</sub> CN | 80        | 1.5        | 42                     |
| 7 <sup>c</sup>       | PEI-Me                          | 1,4-dioxane        | 80        | 1.5        | Traces                 |
| 8 <sup>c</sup>       | PEI-Me                          | 1,2-DCE            | 80        | 1.5        | 35                     |
| 9 <sup>c</sup>       | PEI-Me                          | DCM                | 80        | 1.5        | 28                     |
| 10 <sup>c</sup>      | PEI-Me                          | DMF                | 80        | 1.5        | 53                     |
| 11 <sup>c</sup>      | PEI-Bz                          | MeOH               | 80        | 1.5        | 76                     |
| 12 <sup>c</sup>      | PEI                             | MeOH               | 80        | 1.5        | Traces                 |
| 13 <sup>d</sup>      | Piperidine                      | MeOH               | 80        | 1.5        | 53                     |
| 14 <sup>d</sup>      | Pyridine                        | MeOH               | 80        | 1.5        | 49                     |
| 15 <sup>d</sup>      | DBU                             | MeOH               | 80        | 1.5        | 68                     |
| 15 <sup>d</sup>      | K <sub>2</sub> CO <sub>3</sub>  | MeOH               | 80        | 1.5        | Traces                 |
| 16 <sup>d</sup>      | Cs <sub>2</sub> CO <sub>3</sub> | MeOH               | 80        | 1.5        | Traces                 |

<sup>a</sup>All the reaction were carried out 1 mmol 3-cyanoacetyl indole, 1 mmol naphthol and 1 mmol 4-chlorobenzaldehyde in 3 ml of various solvents and catalysts

<sup>b</sup>Isolated yield

<sup>c</sup>50 mg of catalyst was used

<sup>d</sup>0.5 mmol of catalyst was used  
PEI = Polyamine

**General procedure for the synthesis of benzochromenes (BC1-9):** A mixture of substituted aldehyde (1 mmol), Substituted 3-cyanoacetyl indole (1 mmol) and 2-naphthol (1 mmol) containing PEI-Me catalyst (50 mg) were taken in the 5 ml of methanol and it was stirred at 80°C in appropriate time. The progress of the reaction was monitored through thin layer chromatography (TLC) using methanol and Chloroform (1:9) as eluent mixture. After completion, the reaction mixture was cooled to room temperature and the solid obtained was filtered through the Whatman filter paper and washed with cold ethanol. The product thus obtained was in essentially pure form.

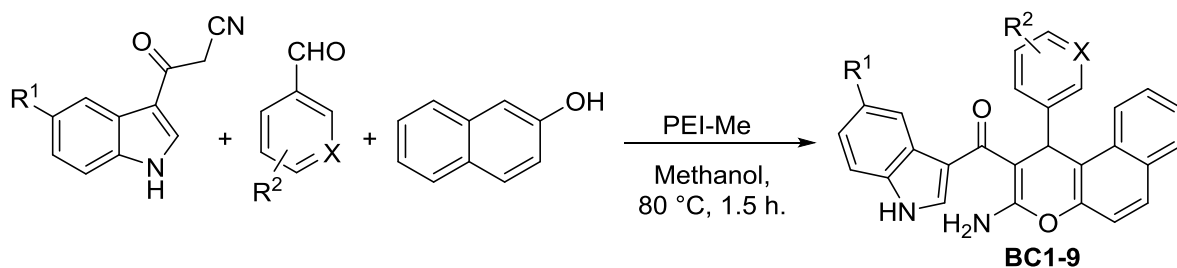

**1-(4-chlorophenyl)-2-(1H-indole-3-carbonyl)-1H-benzo[f]chromen-3-amine (BC1)**

Yield: 89%; Appearance: white solid; mp = 220-222 °C (220–222 °C)<sup>3</sup>; <sup>1</sup>H NMR (300 MHz, DMSO-d<sub>6</sub>): δH (ppm) 6.13 (s, 1H), 6.67 (d, 2H, *J* = 8.4 Hz), 6.96 (t, 1H, *J* = 7.8 Hz), 7.16–7.26 (m, 3H), 7.44–7.60 (m, 5H), 7.71 (t, 1H, *J* = 5.7 Hz), 7.79 (d, 1H, *J* = 2.4 Hz), 7.98 (d, 2H, *J* = 9.0 Hz), 8.78 (s, 2H), 11.68 (s, 1H). <sup>13</sup>C-NMR (75 MHz, DMSO-d<sub>6</sub>, δ ppm); 36.9, 88.9, 112.2, 116.8, 117.5, 119.1, 119.6, 120.2, 120.3, 121.9, 122.7, 124.9, 125.2, 127.2, 128.4, 128.6, 128.7, 129.0, 130.0, 130.8, 131.3, 135.9, 145.9, 147.1, 161.8, 187.5.

**1-(4-bromophenyl)-2-(1H-indole-3-carbonyl)-1H-benzo[f]chromen-3-amine (BC2)**

Yield: 86%; Appearance: white solid; mp = 221-223 °C (220–222 °C)<sup>3</sup>; <sup>1</sup>H NMR (300 MHz, DMSO-d<sub>6</sub>): δH (ppm) 6.15 (s, 1H), 6.73 (d, 2H, *J* = 7.8 Hz), 6.96 (t, 1H, *J* = 7.5 Hz), 7.10–7.21 (m, 3H), 7.44–7.60 (m, 5H), 7.71 (t, 1H, *J* = 4.5 Hz), 7.78 (s, 1H), 7.97 (d, 2H, *J* = 8.4 Hz), 8.77 (s, 2H), 11.67 (s, 1H). <sup>13</sup>C-NMR (75 MHz, DMSO-d<sub>6</sub>, δ ppm); 36.8, 88.9, 112.1, 116.7, 117.5, 119.6, 120.2, 120.3, 121.9, 122.7, 124.9, 125.2, 127.2, 128.1, 128.3, 128.7, 129.0, 130.0, 130.6, 130.8, 135.9, 145.5, 147.1, 161.8, 187.4.

**2-(1H-indole-3-carbonyl)-1-(3-nitrophenyl)-1H-benzo[f]chromen-3-aminen (BC3)**

Yield: 84%; Appearance: Yellow solid; mp = 212-214 °C (213–215 °C)<sup>3</sup>; <sup>1</sup>H NMR (300 MHz, DMSO-d<sub>6</sub>): δH (ppm) 6.27 (s, 1H), 6.96 (t, 1H, *J* = 7.8 Hz), 7.17 (q, 2H, *J* = 7.8 Hz), 7.35 (t, 1H, *J* = 8.1 Hz), 7.44–7.56 (m, 6H), 7.70 (t, 1H, *J* = 5.4 Hz), 7.81 (d, 1H, *J* = 2.4 Hz), 7.85 (d, 1H, *J* = 1.8 Hz), 7.88 (s,

1H,  $J = 2.1$ Hz), 7.97-8.04 (m, 2H), 8.82 (s, 2H), 11.72 (s, 1H).  $^{13}\text{C}$ -NMR (75 MHz, DMSO- $d_6$ ,  $\text{CDCl}_3$   $\delta$  ppm); 36.8, 89.0, 111.6, 116.1, 117.9, 118.1, 119.5, 120.2, 120.3, 120.9, 121.6, 122.1, 123.9, 124.3, 126.5, 127.17, 127.9, 128.5, 128.6, 129.8, 130.5, 132.4, 135.6, 147.0, 147.3, 147.9, 161.4, 187.9.

**1-(2,4-dichlorophenyl)-2-(1H-indole-3-carbonyl)-1H-benzo[f]chromen-3-amine (BC4)**

Yield: 91%; Appearance: white solid; mp = 229-232 °C (229–230°C)<sup>3</sup>;  $^1\text{H}$  NMR (300 MHz, DMSO- $d_6$ ):  $\delta\text{H}$  (ppm) 6.41 (s, 1H), 6.85-6.94 (m, 2H), 7.14 (t, 2H,  $J = 7.5$  Hz), 7.23 (d, 1H,  $J = 1.8$  Hz), 7.98 (t, 2H,  $J = 9$  Hz), 8.55 (s, 2H), 11.63 (s, 1H).  $^{13}\text{C}$ -NMR (75 MHz, DMSO- $d_6$ ,  $\delta$  ppm);  $^{13}\text{C}$ -NMR (75 MHz, DMSO, - $d_6$ ,  $\delta$  ppm); 34.9, 88.6, 112.0, 116.9, 118.1, 119.3, 119.6, 120.2, 121.7, 122.4, 125.0, 125.4, 127.2, 127.9, 128.6, 128.7, 128.9, 129.3, 130.2, 130.7, 130.9, 131.3, 136.0, 143.7, 147.2, 160.9, 187.9.

**2-(1H-indole-3-carbonyl)-1-(3-methoxyphenyl)-1H-benzo[f]chromen-3-amine (BC5)**

Yield: 83%; Appearance: white solid; mp = 229-232°C (228–230°C)<sup>3</sup>;  $^1\text{H}$  NMR (300 MHz, DMSO- $d_6$ ):  $\delta\text{H}$  (ppm) 3.43 (s, 3H), 6.13-6.31 (m, 3H, ), 6.56 (s, 1H), 6.96-7.96 (m, 12H), 8.77 (s, 2H), 7.44–7.56 (m, 6H), 11.66 (s, 1H).  $^{13}\text{C}$ -NMR (75 MHz, DMSO,  $\delta$  ppm);  $^{13}\text{C}$ -NMR (75 MHz, DMSO- $d_6$ ,  $\delta$  ppm); 37.2, 89.2, 110.9, 112.1, 112.4, 116.7, 117.6, 118.5, 120.0, 120.3, 121.9, 122.8, 124.8, 125.3, 127.0, 128.2, 128.6, 128.8, 129.5, 130.2, 130.8, 135.9, 147.2, 148.1, 159.0, 161.9, 187.5.

**2-(5-bromo-1H-indole-3-carbonyl)-1-(naphthalen-2-yl)-1H-benzo[f]chromen-3-amine (BC6)**

Yield: 78%; Appearance: pale brown solid; mp = 255-257°C (256–258°C)<sup>3</sup>;  $^1\text{H}$  NMR (300 MHz, DMSO- $d_6$ ):  $\delta\text{H}$  (ppm) 6.27 (s, 1H), 7.06 (d, 1H,  $J = 9.9$  Hz), 7.16 (s, 1H), 7.28-7.38 (m, 3H), 7.43–7.53 (m, 5H), 7.64 (d, 1H,  $J = 8.7$  Hz), 7.68-7.74 (m, 2H), 7.97 (t, 4H,  $J = 9.0$  Hz), 8.83 (s, 2H), 11.85 (s, 1H).  $^{13}\text{C}$ -NMR (75 MHz, DMSO- $d_6$ ,  $\delta$  ppm); 37.5, 88.9, 113.1, 114.0, 116.7, 116.9, 119.9, 122.6, 122.8, 124.2, 124.5, 124.9, 125.2, 125.6, 126.1, 127.2, 127.4, 127.5, 128.3, 128.6, 128.9, 129.6, 130.2, 130.8, 131.5, 132.6, 134.6, 143.8, 147.1, 162.1, 186.8.

**2-(5-bromo-1H-indole-3-carbonyl)-1-(4-chlorophenyl)-1H-benzo[f]chromen-3-amine (BC7)**

Yield: 88%; Appearance: white solid; mp = 230-232 °C (231–233 °C)<sup>3</sup>;  $^1\text{H}$  NMR (300 MHz, DMSO- $d_6$ ):  $\delta\text{H}$  (ppm) 6.10 (s, 1H), 6.82 (d, 2H,  $J = 8.4$  Hz), 7.13(d, 2H,  $J = 8.4$  Hz), 7.29 (dd, 1H,  $J = 8.7$  Hz,  $J = 1.8$  Hz ), 7.43–7.55 (m, 4H), 7.76 (d, 1H,  $J = 1.5$  Hz), 7.87 (d, 1H,  $J = 8.1$  Hz), 7.98 (t, 3H,  $J = 9.9$  Hz), 8.82 (s, 2H), 11.87 (s, 1H).  $^{13}\text{C}$ -NMR (75 MHz, DMSO- $d_6$ ,  $\delta$  ppm); 34.8, 88.5, 113.1, 113.9, 116.9, 117.3, 119.7, 121.8, 122.2, 124.2, 125.0, 127.4, 128.2, 128.7, 129.4, 130.1, 130.4, 130.7, 131.2, 131.4, 134.7, 143.5, 147.2, 161.2, 187.0.

**2-(5-bromo-1H-indole-3-carbonyl)-1-(2,4-dichlorophenyl)-1H-benzo[f]chromen-3-amine (BC8)**

Yield: 86%; Appearance: white solid; mp = 229-232 °C (228–230 °C)<sup>3</sup>;  $^1\text{H}$  NMR (300 MHz, DMSO- $d_6$ ):  $\delta\text{H}$  (ppm) 6.38 (s, 1H), 6.97 (d, 1H,  $J = 8.7$  Hz), 7.16-7.28 (m, 3H), 7.44–7.52 (m, 5H), 7.77 (d, 1H,

$J = 6.0 \text{ Hz}$ ), 7.87 (s, 1H), 7.99-8.02 (m, 2H), 8.57 (s, 2H), 11.82 (s, 1H).  $^{13}\text{C-NMR}$  (75 MHz, DMSO- $d_6$ ,  $\delta$  ppm); 36.7, 88.7, 113.2, 114.1, 116.6, 116.7, 119.7, 122.7, 124.4, 124.9, 127.4, 127.51, 128.2, 128.4, 128.7, 129.0, 129.7, 129.9, 130.7, 130.79, 134.6, 145.3, 147.0, 162.2, 186.6.

**2-(5-bromo-1H-indole-3-carbonyl)-1-(pyridin-3-yl)-1H-benzo[*f*]chromen-3-amine (BC9)**

Yield: 90%; Appearance: white solid; mp = 249–251 °C (248–251 °C)<sup>3</sup>;  $^1\text{H NMR}$  (300 MHz, DMSO- $d_6$ ):  $\delta\text{H}$  (ppm) 6.16 (s, 1H), 7.09- 7.13(m, 1H), 7.17-7.21 (m, 1H), 7.29 (dd, 1H,  $J = 8.4 \text{ Hz}$ , 1.8 Hz), 7.44–7.56 (m, 4H), 7.75 (d, 1H,  $J = 1.8 \text{ Hz}$ ), 7.90 (d, 1H,  $J = 8.1\text{Hz}$ ), 7.98-8.01 (m, 4H), 8.20 (dd, 1H,  $J = 4.8 \text{ Hz}$ , 1.5 Hz), 8.85 (s, 2H), 11.85 (s, 1H).  $^{13}\text{C-NMR}$  (75 MHz, DMSO- $d_6$ ,  $\delta$  ppm); 35.1, 88.3, 113.2, 114.0, 116.5, 116.7, 119.0, 122.6, 122.7, 123.8, 124.5, 124.9, 127.5, 127.6, 128.7, 129.2, 129.6, 129.9, 130.8, 133.9, 134.6, 141.8, 147.0, 147.3, 147.5, 162.1, 186.6.

**General procedure for the synthesis of pyranopyrazoles (PP 1-4).** A mixture of aromatic substituted aldehyde (1 mmol), 3-methyl-1-phenyl-2-pyrazoline-5-one (174.20 mg, 1mmol), malononitrile(66mg, 1 mmol) and PEI-Bz (50 mg) were taken in the 3 ml of ethanol and was stirred at 80 °C for 45 min to 1 h. The progress of the reaction was monitored through thin layer chromatography (TLC) using chloroform and methanol (9:1) as eluent mixture. After completion, the reaction mixture was cooled to room temperature and the reaction was quenched with distilled water (5 mL) followed by extracted with ethyl acetate (2×5 mL), washed with brine solution and dried over anhydrous sodium sulphate. The organic layer was filtered and concentrated under reduced pressure. The crude reaction mass further purified through column chromatography (Chloroform: Methanol (9:1)).

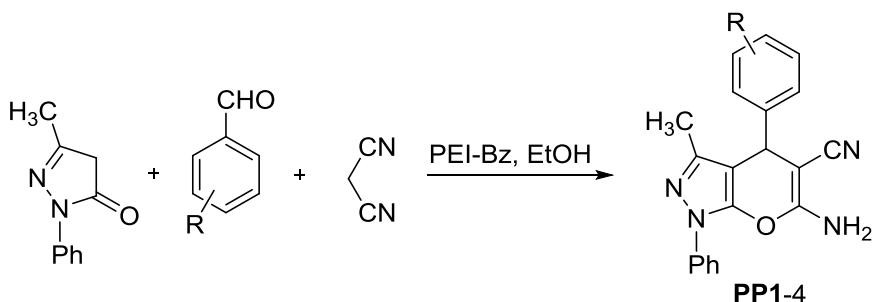

**6-amino-4-(4-chlorophenyl)-3-methyl-1-phenyl-1H,4H-pyranopyrazole-5-carbonitrile (PP1)**

Yield:96%;Appearance: white solid; mp = 175-176 °C (175-176 °C)<sup>4</sup>;  $^1\text{H NMR}$  (300 MHz,  $\text{CDCl}_3$ ):  $\delta\text{H}$  (ppm) 1.89 (s, 3H), 4.66 (s, 1H), 4.72 (s, 2H),7.20 (d,  $J = 4.8 \text{ Hz}$ , 2H),7.30-7.35 (m, 3H ), 7.47 (t,  $J = 7.5 \text{ Hz}$ , 2H), 7.64 (d,  $J = 7.5 \text{ Hz}$ , 2H);  $^{13}\text{C-NMR}$  (75 MHz, DMSO- $d_6$ ,  $\text{CDCl}_3$   $\delta$  ppm);12.8, 36.7, 60.8, 97.9, 119.6, 120.9, 126.5, 128.7, 129.1, 129.2, 132.9, 137.6, 141.2, 144.0, 145.9, 159.1.

**6-amino-3-methyl-4-(4-nitrophenyl)-1-phenyl-1H,4H-pyrano[2,3-c]pyrazole-5-carbonitrile (PP2)**

Yield: 97%; Appearance: white Solid; mp= 195-196 °C, (196-198 °C)<sup>4</sup>; <sup>1</sup>H NMR (300 MHz, CDCl<sub>3</sub>): δH (ppm) 1.82 (s, 3H), 4.74 (s, 2H), 4.75 (s, 1H), 7.30 (t, *J* = 7.5 Hz, 1H), 7.37-7.44 (m, 4H), 7.60 (d, *J* = 9.6 Hz, 2H), 8.17 (dd, *J* = 8.7, 1.8 Hz, 2H); <sup>13</sup>C-NMR (75 MHz, DMSO-d<sub>6</sub>, CDCl<sub>3</sub> δ ppm); 12.3, 28.9, 58.5, 96.6, 119.0, 120.4, 123.4, 126.0, 128.3, 128.6, 136.9, 143.6, 145.1, 146.5, 149.6, 159.1.

**6-amino-3-methyl-4-(4-methylphenyl)-1-phenyl-1H,4H-pyrano[2,3-c]pyrazole-5-carbonitrile (PP3)**

Yield: 82%; Appearance: white Solid; mp= 177-178 °C (177-179 °C)<sup>4</sup>; <sup>1</sup>H NMR (300 MHz, CDCl<sub>3</sub>): δH (ppm) 1.18 (s, 3H), 1.82 (s, 3H), 4.75 (s, 1H), 4.77 (merged singlet, 2H), 7.27 (t, *J* = 7.5 Hz, 1H), 7.41 (t, *J* = 8.1 Hz, 2H), 7.50 (t, *J* = 8.1 Hz, 1H), 7.60 (d, *J* = 9.0 Hz, 3H), 8.04 (s, 1H), 8.12 (d, *J* = 9 Hz, 1H); <sup>13</sup>C-NMR (75 MHz, DMSO-d<sub>6</sub>, CDCl<sub>3</sub> δ ppm); 12.6, 29.4, 37.2, 61.6, 98.2, 119.5, 120.7, 126.2, 127.1, 127.6, 128.4, 128.9, 137.4, 142.2, 143.8, 146.0, 158.7.

**6-amino-3-methyl-1,4-diphenyl-1H,4H-pyrano[2,3-c]pyrazole-5-carbonitrile (PP4)**

Yield: 97%; Appearance: white Solid; mp=170-171 °C (169-171 °C)<sup>4</sup>; <sup>1</sup>H NMR (300 MHz, CDCl<sub>3</sub>): δH (ppm) 1.82 (s, 3H), 4.59 (s, 1H), 4.63 (s, 2H), 7.17-7.31 (m, 6H), 7.39-7.41 (m, 2H), 7.58 (dd, *J* = 9.6, 0.9 Hz, 2H). <sup>13</sup>C-NMR (75 MHz, DMSO-d<sub>6</sub>, CDCl<sub>3</sub> δ ppm); 12.6, 37.1, 59.7, 96.9, 119.2, 120.8, 122.3, 122.4, 126.4, 128.9, 129.5, 133.9, 137.2, 143.8, 144.7, 145.5, 148.3, 159.2

**General procedure for the synthesis of cyclic ketones (CK 1-3) or pyrazole (PZ1):** A mixture of substituted aldehyde (1 mmol), 1,3 cyclohexadione (or) 3-methyl-1-phenyl-2-pyrazoline-5-one (348.4 mg; 2 mmol) and PEI-Bz polyamine catalyst (100 mg) were taken in the 5 ml of ethanol and it was stirred at RT. The progress of the reaction was monitored through thin layer chromatography (TLC) using ethyl acetate and petroleum ether (3: 7) as eluent mixture. After completion, the reaction mixture was poured in to crushed ice and filtered through the Whatman filter paper. The solid mass was collected and further stirred in hexane (1 x 10 mL) for 10 minutes and filtered through whatman filter paper. The product thus obtained was essentially pure.

Cyclic ketone derivatives have limited solubility in CDCl<sub>3</sub>. Hence, <sup>13</sup>C-NMR spectra's were run on DMSO-d<sub>6</sub> solvent. The Cyclic ketone derivatives exhibited keto-enol tautomerism in polar DMSO-d<sub>6</sub> solvent. Yu *et al.*, already reported the presence of keto-enol tautomerism in cyclic ketone derivatives.<sup>5a</sup>



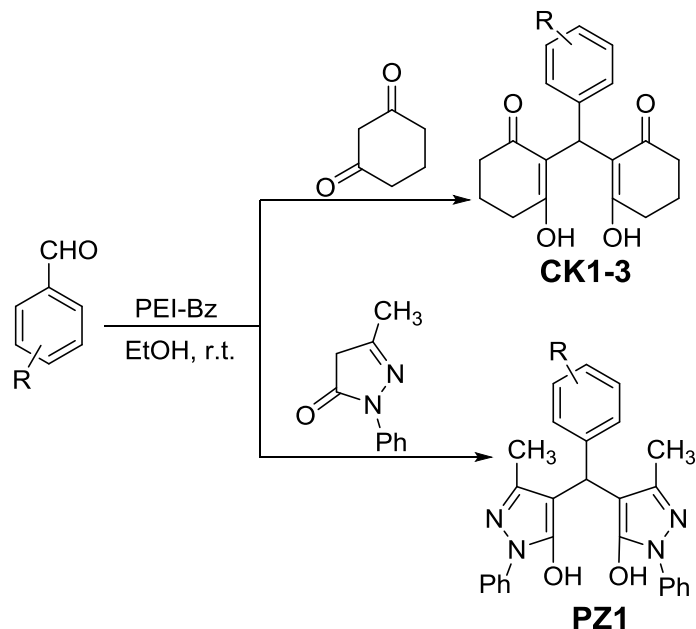

**2-[(4-chlorophenyl)(2-hydroxy-6-oxocyclohex-1-en-1-yl)methyl]-3-hydroxycyclohex-2-en-1-one. (CK1)**

Yield: 97%; Appearance: white solid; mp = 202-204 °C (202-204 °C)<sup>5b</sup>; <sup>1</sup>H NMR (300 MHz, CDCl<sub>3</sub>): δ δH (ppm) 1.94-2.07 (m, 4H), 2.33-2.68 (m, 8H), 5.40 (s, 1H), 7.02 (dd, *J* = 8.4 Hz, 2H), 7.22 (d, *J* = 6.9 Hz, 2H), 12.34 (s, 2H); <sup>13</sup>C-NMR (100 MHz, DMSO-d<sub>6</sub>, δ ppm); 20.2, 20.4, 20.9, 21.0, 28.92, 29.1, 31.9, 32.6, 33.5, 35.3, 36.2, 37.1, 37.2, 59.4, 60.0, 100.5, 101.5, 111.2, 115.8, 127.6, 127.7, 127.8, 128.2, 128.8, 129.8, 130.1, 130.2, 130.8, 143.9, 144.6, 198.3, 169.9, 189.7, 195.9, 196.4, 205.3, 206.3.

**3-hydroxy-2-[(2-hydroxy-6-oxocyclohex-1-en-1-yl)(phenyl)methyl]cyclohex-2-en-1-one (CK2)**

Yield: 98%; Appearance: white solid; mp = 190-191 °C (190-191 °C)<sup>5b</sup>; <sup>1</sup>H NMR (300 MHz, CDCl<sub>3</sub>): δ δH (ppm) 1.94-2.00 (m, 4H), 2.26-2.60 (m, 8H), 5.40 (s, 1H), 7.02-7.12 (m, 3H), 7.17-7.22 (m, 2H), 7.20 (t, *J* = 7.5 Hz, 2H), 12.0 (br s, 1H), 12.30 (s, 1H); <sup>13</sup>C-NMR (100 MHz, DMSO-d<sub>6</sub>, δ ppm); 19.0, 20.2, 20.4, 20.5, 21.0, 29.0, 29.1, 32.7, 32.9, 33.7, 35.4, 36.1, 37.1, 37.2, 59.8, 60.5, 100.5, 101.4, 111.5, 116.0, 116.3, 125.3, 125.6, 126.9, 127.7, 127.8, 128.2, 128.9, 144.8, 145.7, 167.9, 169.6, 189.7, 198.9, 196.4, 205.3, 206.7.

**3-hydroxy-2-[(2-hydroxy-6-oxocyclohex-1-en-1-yl)(4-methoxyphenyl)methyl]cyclohex-2-en-1-one (CK3)**

Yield: 82%; Appearance: white solid; mp = 194-196 °C (195-197 °C)<sup>5b</sup>; <sup>1</sup>H NMR (300 MHz, CDCl<sub>3</sub>): δ δH (ppm) 1.90-1.99 (m, 4H), 2.25-2.59 (m, 8H), 3.71 (s, 3H), 5.35 (s, 1H), 6.73 (d, *J* = 9.0 Hz, 2H), 6.94 (d, *J* = 8.4 Hz, 2H), 12.30 (s, 1H); <sup>13</sup>C-NMR (100 MHz, DMSO-d<sub>6</sub>, δ ppm); 21.0, 29.0, 29.1, 32.0, 32.3,

33.6, 35.4, 35.9, 37.1, 37.3, 55.3, 55.4, 60.6, 100.5, 101.4, 111.9, 113.2, 113.3, 113.7, 116.3, 116.5, 127.8, 129.1, 129.7, 136.6, 137.5, 157.2, 157.3, 167.6, 169.4, 189.9, 195.9, 196.3, 205.4, 206.8.

**4-[(4-chlorophenyl)(5-hydroxy-3-methyl-1-phenyl-1H-pyrazol-4-yl)methyl]-3-methyl-1-phenyl-1H-pyrazol-5-ol (PZ1)**

Yield: 89%; Appearance: white solid; mp = 208-210 °C (210-212 °C)<sup>6</sup>; <sup>1</sup>H NMR (300 MHz, DMSO-d<sub>6</sub>): δH (ppm) 2.32 (s, 6H), 4.97 (s, 1H), 7.25 (t, *J* = 8.1 Hz, 4H), 7.34 (d, *J* = 8.4 Hz, 2H), 7.44 (t, *J* = 7.8 Hz, 2H), 7.70 (t, *J* = 8.1 Hz, 4H), 12.51 (s, 1H), 13.89 (s, 1H); <sup>13</sup>C-NMR (100 MHz, DMSO-d<sub>6</sub>, δ ppm); 12.1, 331, 121.0, 126.1, 128.5, 129.4, 129.6, 131.1, 137.7, 141.6, 146.7.

**Procedure for recyclability of PEI-Bz on CK1 synthesis**

-the reaction mixture was poured in to crushed ice and filtered through the Whatman filter paper. The combined filtrate was concentrated under reduced pressure and extracted with chloroform (2 × 15 mL). The combined organic extracts were dried over anhydrous sodium sulfate, filtered and concentrated under reduced pressure. The recycled catalyst was without further purification.

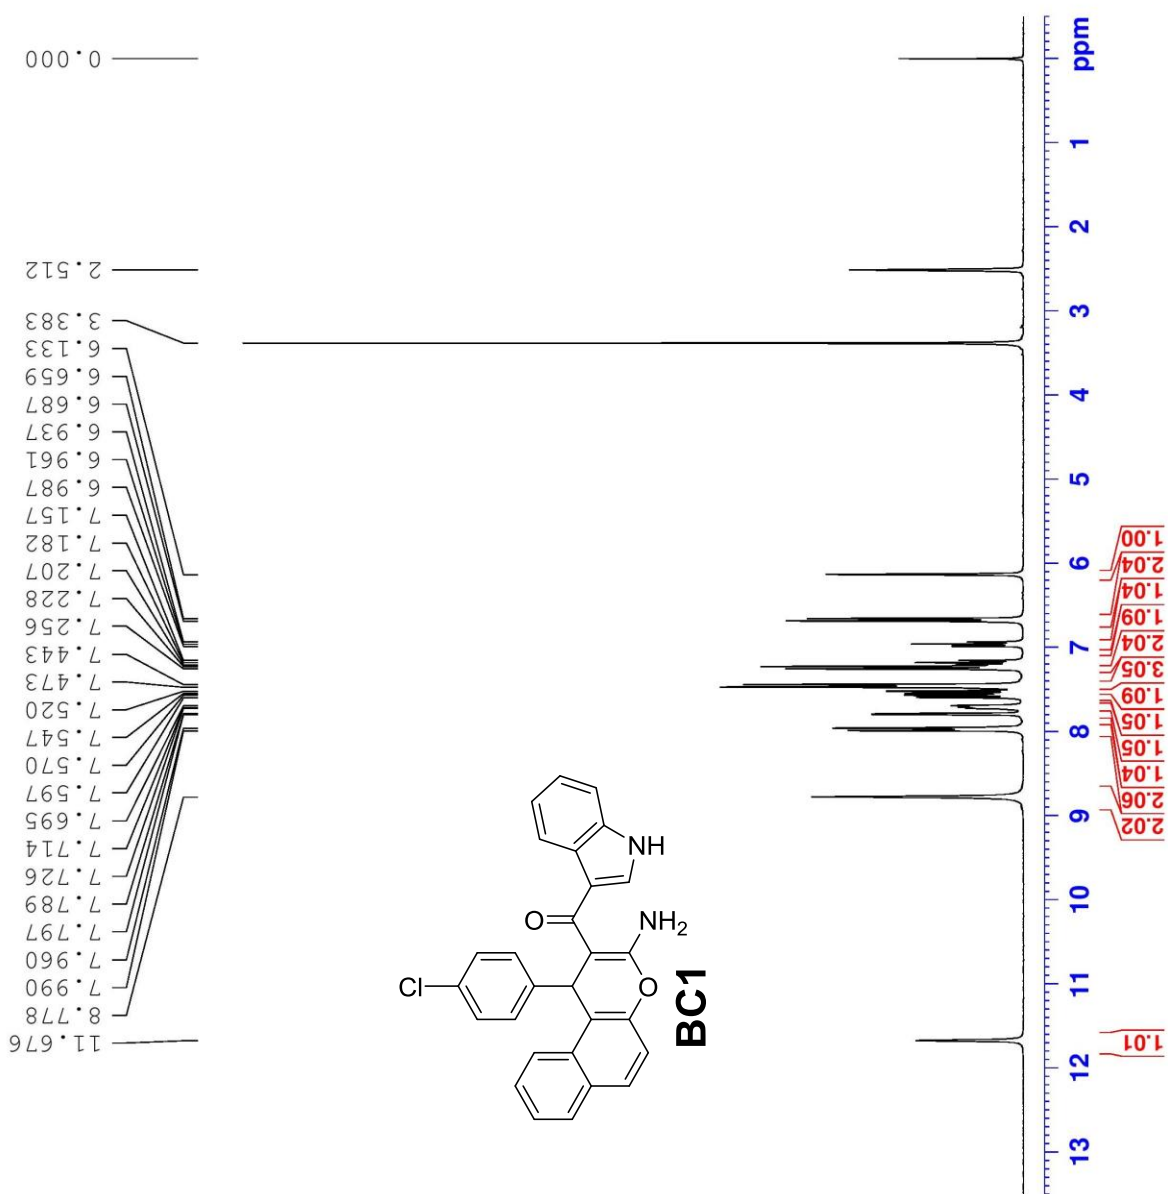

Current Data Parameters  
 NAME 0459D  
 EXPNO 1  
 PROCNO 1

F2 - Acquisition Parameters  
 Date\_ 20150402  
 Time\_ 14.43  
 INSTRUM spect  
 PROBHD 5 mm BBO BB-1H  
 PULPROG zg30  
 TD 65536  
 SOLVENT DMSO  
 NS 16  
 DS 2  
 SWH 6188.119 Hz  
 FIDRES 0.094423 Hz  
 AQ 5.2953587 sec  
 RG 181  
 DW 80.800 usec  
 DE 6.00 usec  
 TE 300.0 K  
 DI 1.00000000 sec  
 TD0 1

===== CHANNEL f1 =====  
 NUC1 1H  
 P1 8.60 usec  
 PL1 -2.00 dB  
 SFO1 300.1318534 MHz

F2 - Processing parameters  
 SI 32768  
 SF 300.1299972 MHz  
 WDW EM  
 SSB 0  
 LB 0.30 Hz  
 GB 0  
 PC 1.00

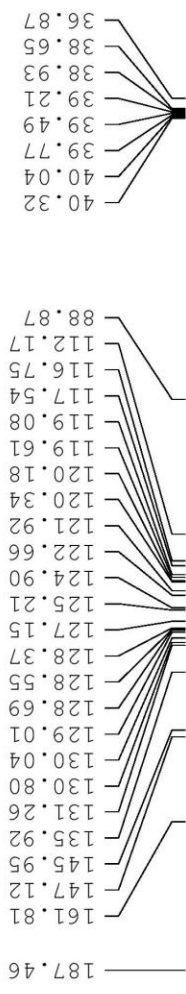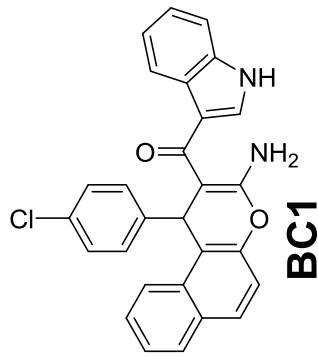

```

Current Data Parameters
NAME      1273S
EXPNO    1
PROCNO   1

F2 - Acquisition Parameters
Date_    20160113
Time     18.18
INSTRUM  spect
PROBHD   5 mm BBO BB-1H
PULPROG  zgpg30
TD        65536
SOLVENT  DMSO
NS        225
DS         4
SWH       18028.846 Hz
FIDRES    0.275098 Hz
AQ         1.8175818 sec
RG         256
DE         27.733 usec
TE         300.0 K
D1         2.0000000 sec
d11        0.0300000 sec
DELTA     1.89999998 sec
TD0        1

===== CHANNEL f1 =====
NUC1       13C
P1         10.00 usec
PL1        0.00 dB
SFO1       75.4752953 MHz

===== CHANNEL f2 =====
CPDPRG2   waltz16
NUC2       1H
PCPD2     80.00 usec
PL2       -2.00 dB
PL12      16.98 dB
PL13      20.00 dB
SFO2      300.1312005 MHz

F2 - Processing parameters
SI         32768
SF         75.4677867 MHz
WDW        EM
SSB        0
LB         1.00 Hz
GB         0
PC         1.40

```

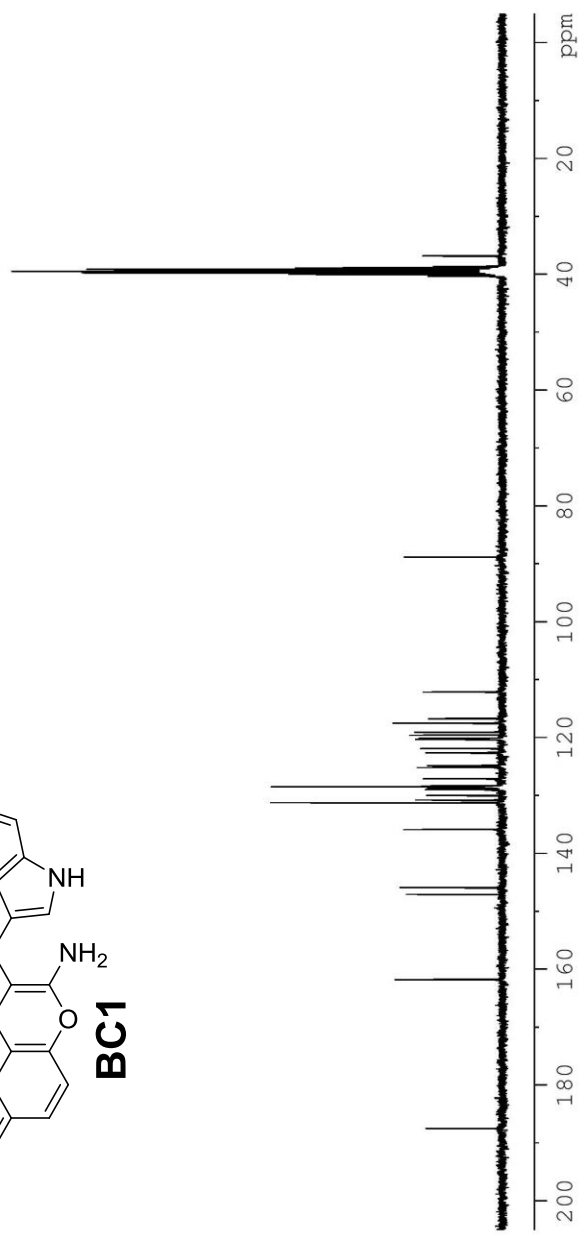

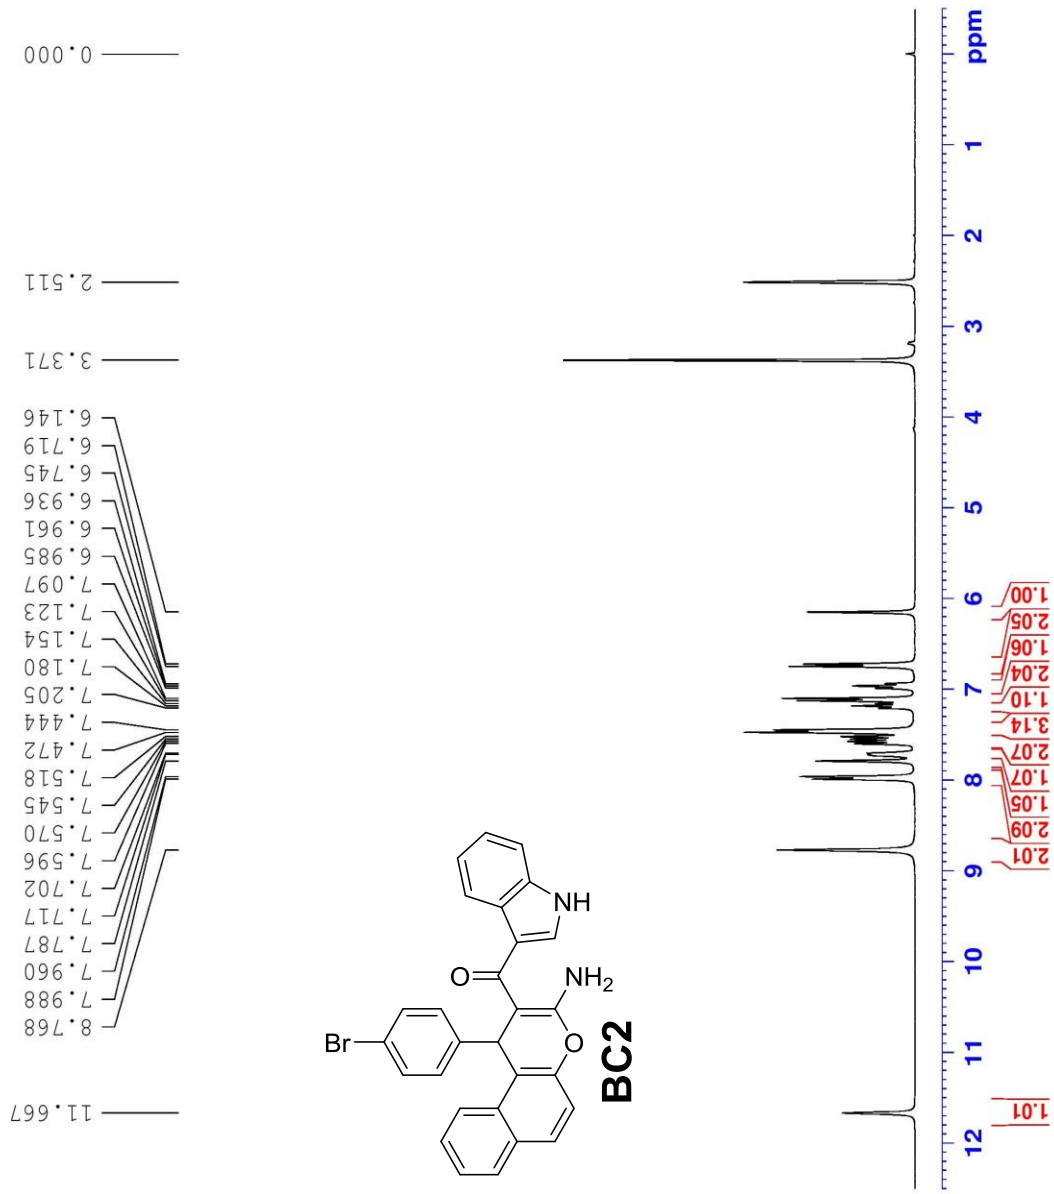

```

Current Data Parameters
NAME          0654H
EXPNO        1
PROCNO       1

F2 - Acquisition Parameters
Date_        20150525
Time         14.47
INSTRUM      spect
PROBHD       5 mm BBO BB-1H
PULPROG      zg30
ID           65536
SOLVENT      DMSO
NS           16
DS           2
SWH          6188.119 Hz
FIDRES       0.094423 Hz
AQ           5.2953587 sec
RG           203
DW           80.800 usec
DE           6.00 usec
TE           300.0 K
D1           1.00000000 sec
TD0          1

===== CHANNEL f1 =====
NUC1         1H
P1           8.60 usec
PL1         -2.00 dB
SFO1        300.1318534 MHz

F2 - Processing parameters
SI           32768
SF          300.1299977 MHz
WDW          EM
SSB          0
LB           0.30 Hz
GB           0
PC           1.00

```

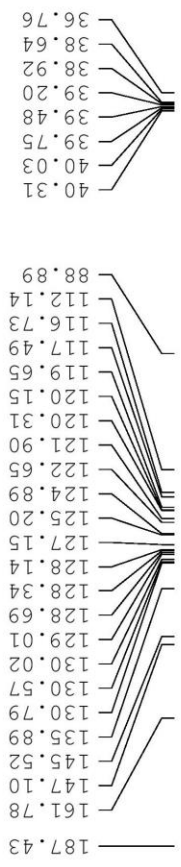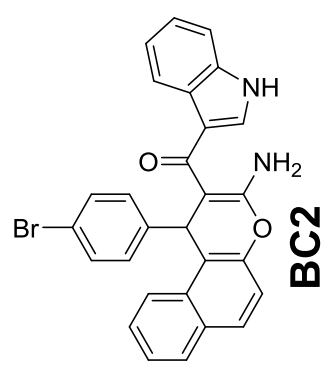

```

Current Data Parameters
NAME      1429A
EXPNO     1
PROCNO    1

F2 - Acquisition Parameters
Date_     20160222
Time      11.42
INSTRUM   spect
PROBHD    5 mm BBO BB-1H
PULPROG   zgpg30
TD         65536
SOLVENT   DMSO
NS         865
DS         4
SWH       18028.846 Hz
FIDRES    0.275098 Hz
AQ         1.8175818 sec
RG         228
DW         27.733 usec
DE         6.00 usec
TE         300.0 K
d1         2.00000000 sec
d11        0.03000000 sec
DELTA     1.89999998 sec
TD0        1

===== CHANNEL f1 =====
NUC1       13C
P1         10.00 usec
PL1        0.00 dB
SFO1       75.4752953 MHz

===== CHANNEL f2 =====
CPDPRG2    waltz16
NUC2        1H
PCPD2      80.00 usec
PL2        -2.00 dB
PL12       16.98 dB
PL13       20.00 dB
SFO2       300.1312005 MHz

F2 - Processing parameters
SI          32768
SF          75.4677867 MHz
WDW         EM
SSB         0
LB          1.00 Hz
GB          0
PC          1.40

```

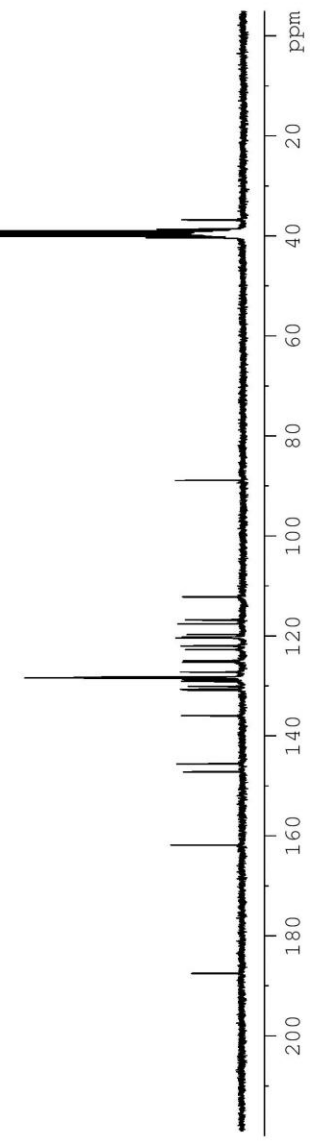

11.715  
 8.816  
 8.037  
 8.006  
 7.986  
 7.974  
 7.880  
 7.873  
 7.852  
 7.846  
 7.809  
 7.801  
 7.715  
 7.702  
 7.684  
 7.561  
 7.548  
 7.535  
 7.521  
 7.491  
 7.485  
 7.477  
 7.472  
 7.462  
 7.452  
 7.444  
 7.377  
 7.351  
 7.324  
 7.212  
 7.188  
 7.153  
 7.127  
 6.988  
 6.964  
 6.938  
 6.271  
 3.372  
 3.189  
 3.172  
 2.511  
 0.000

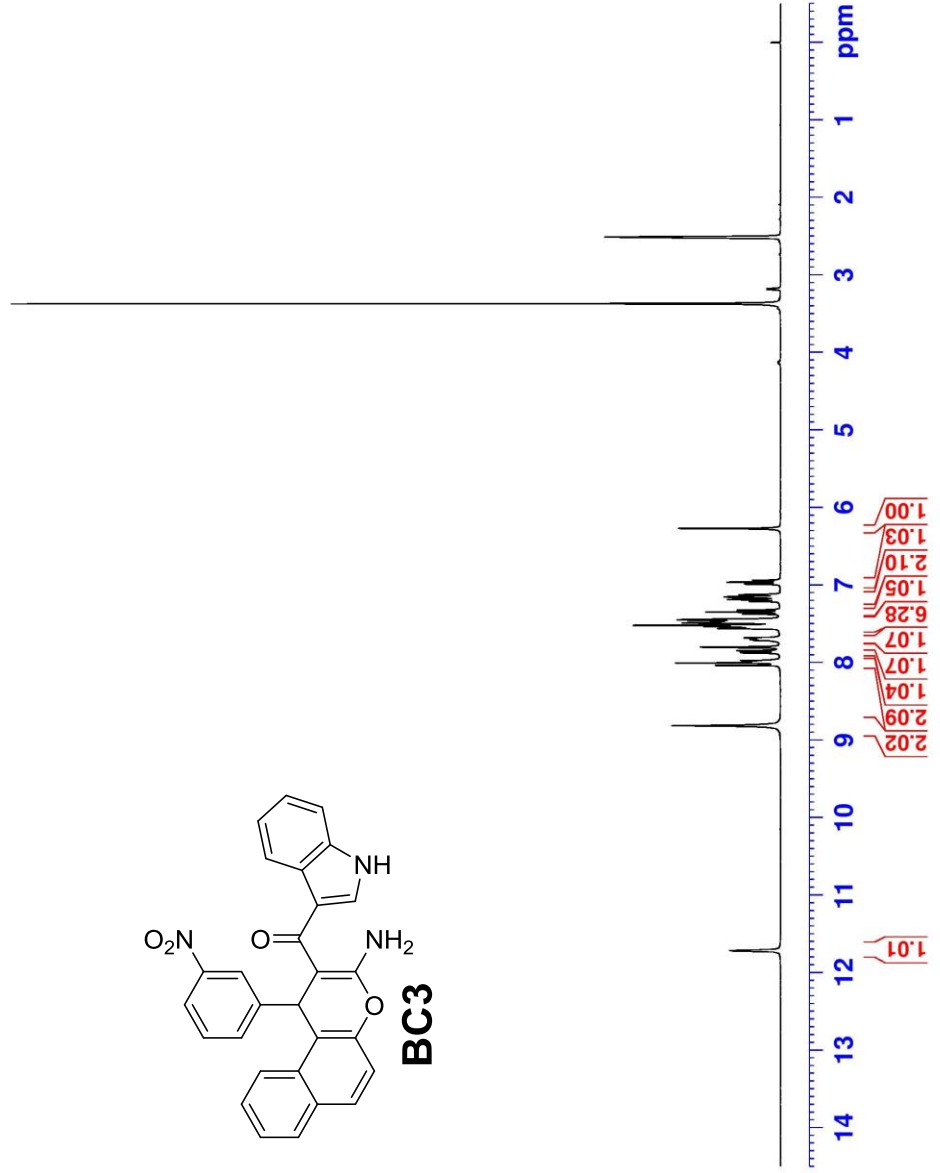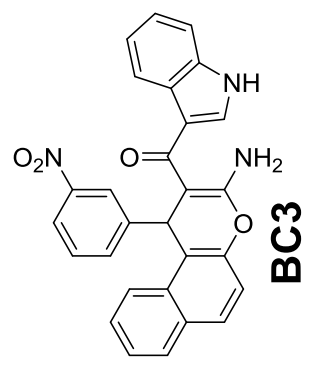

Current Data Parameters  
 NAME 07170  
 EXPNO 1  
 PROCNO 1  
 F2 - Acquisition Parameters  
 Date\_ 20150606  
 Time 16.30  
 INSTRUM spect  
 PROBHD 5 mm BBO BB-1H  
 PULPROG zg30  
 TD 65536  
 SOLVENT DMSO  
 NS 16  
 DS 2  
 SWH 6188.119 Hz  
 FIDRES 0.094423 Hz  
 AQ 5.2953587 sec  
 RG 228  
 DW 80.800 usec  
 DE 6.00 usec  
 TE 300.0 K  
 D1 1.00000000 sec  
 ID0 1  
 ===== CHANNEL f1 =====  
 NUC1 1H  
 P1 8.60 usec  
 PL1 -2.00 dB  
 SFO1 300.1318534 MHz  
 F2 - Processing parameters  
 SI 32768  
 SF 300.1299976 MHz  
 WDW EM  
 SSB 0  
 LB 0.30 Hz  
 GB 0  
 PC 1.00

187.90  
 161.43  
 147.85  
 147.29  
 147.04  
 135.62  
 132.36  
 130.49  
 129.75  
 128.57  
 128.51  
 127.98  
 127.17  
 126.45  
 124.32  
 123.96  
 122.08  
 121.59  
 120.91  
 120.32  
 120.17  
 119.49  
 118.07  
 117.87  
 116.14  
 111.60  
 89.01  
 77.43  
 77.00  
 76.57  
 40.18  
 39.90  
 39.63  
 39.35  
 39.07  
 38.79  
 38.51  
 36.78

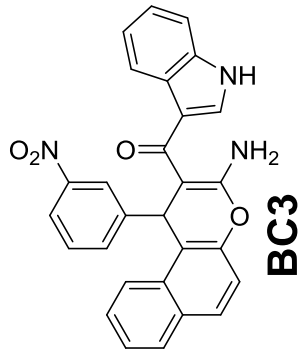

```

Current Data Parameters
NAME          1429D
EXPNO         1
PROCNO        1

F2 - Acquisition Parameters
Date_         20160222
Time_         16.39
INSTRUM       spect
PROBHD        5 mm BBO BB-1H
PULPROG       zgpg30
TD            65536
SOLVENT       DMSO
NS            875
DS            4
SWH           18028.846 Hz
FIDRES        0.275098 Hz
AQ            1.8175818 sec
RG            228
DW            27.733 usec
DE            6.00 usec
TE            300.0 K
D1            2.0000000 sec
d11           0.0300000 sec
DELTA         1.89999998 sec
TD0           1

===== CHANNEL f1 =====
NUC1          13C
P1            10.00 usec
PL1           0.00 dB
SFO1          75.4752953 MHz

===== CHANNEL f2 =====
CPDPRG2       waltz16
NUC2          1H
PCPD2         80.00 usec
PL2           -2.00 dB
PL12          16.98 dB
PL13          20.00 dB
SFO2          300.1312005 MHz

F2 - Processing parameters
SI            32768
SF            75.4678042 MHz
WDW           EM
SSB           0
LB            1.00 Hz
GB            0
PC            1.40
  
```

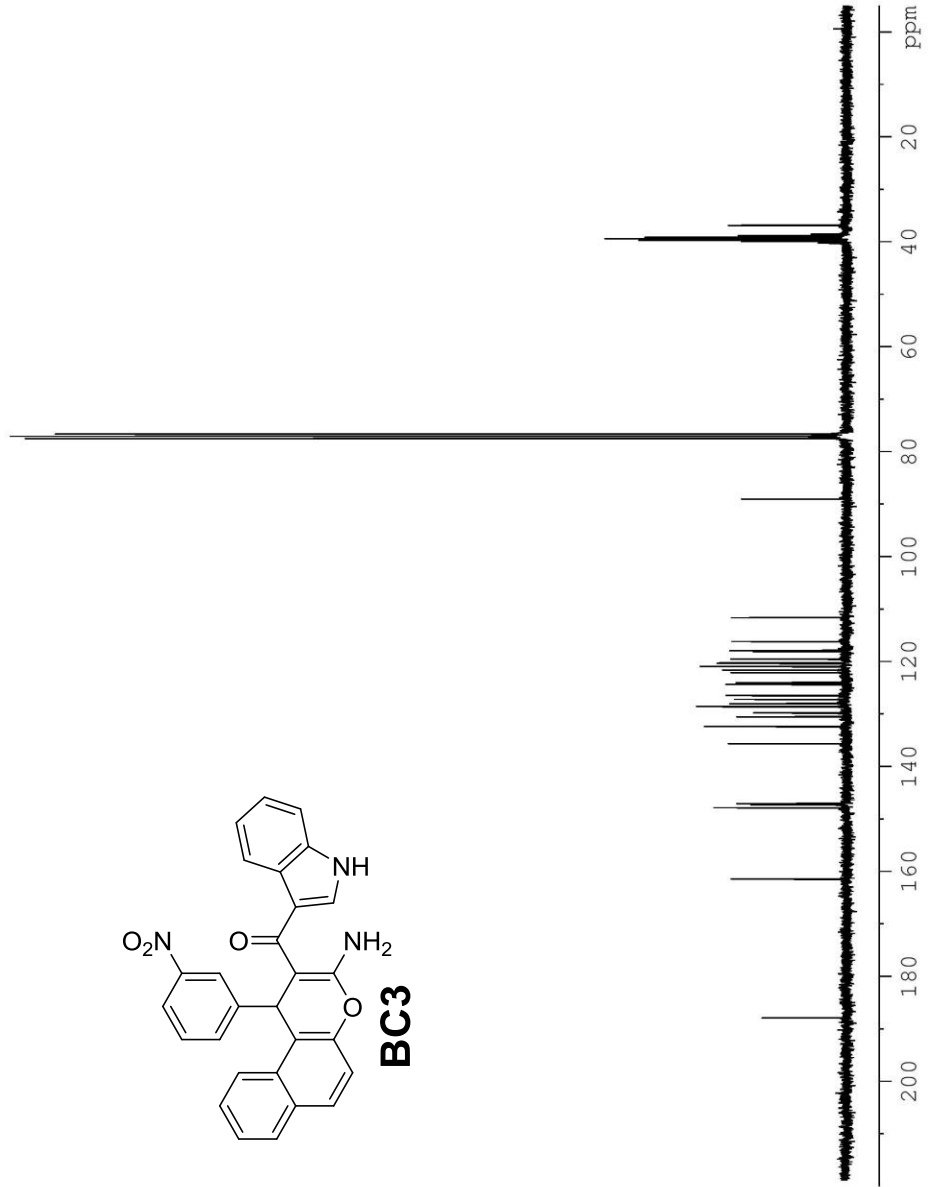



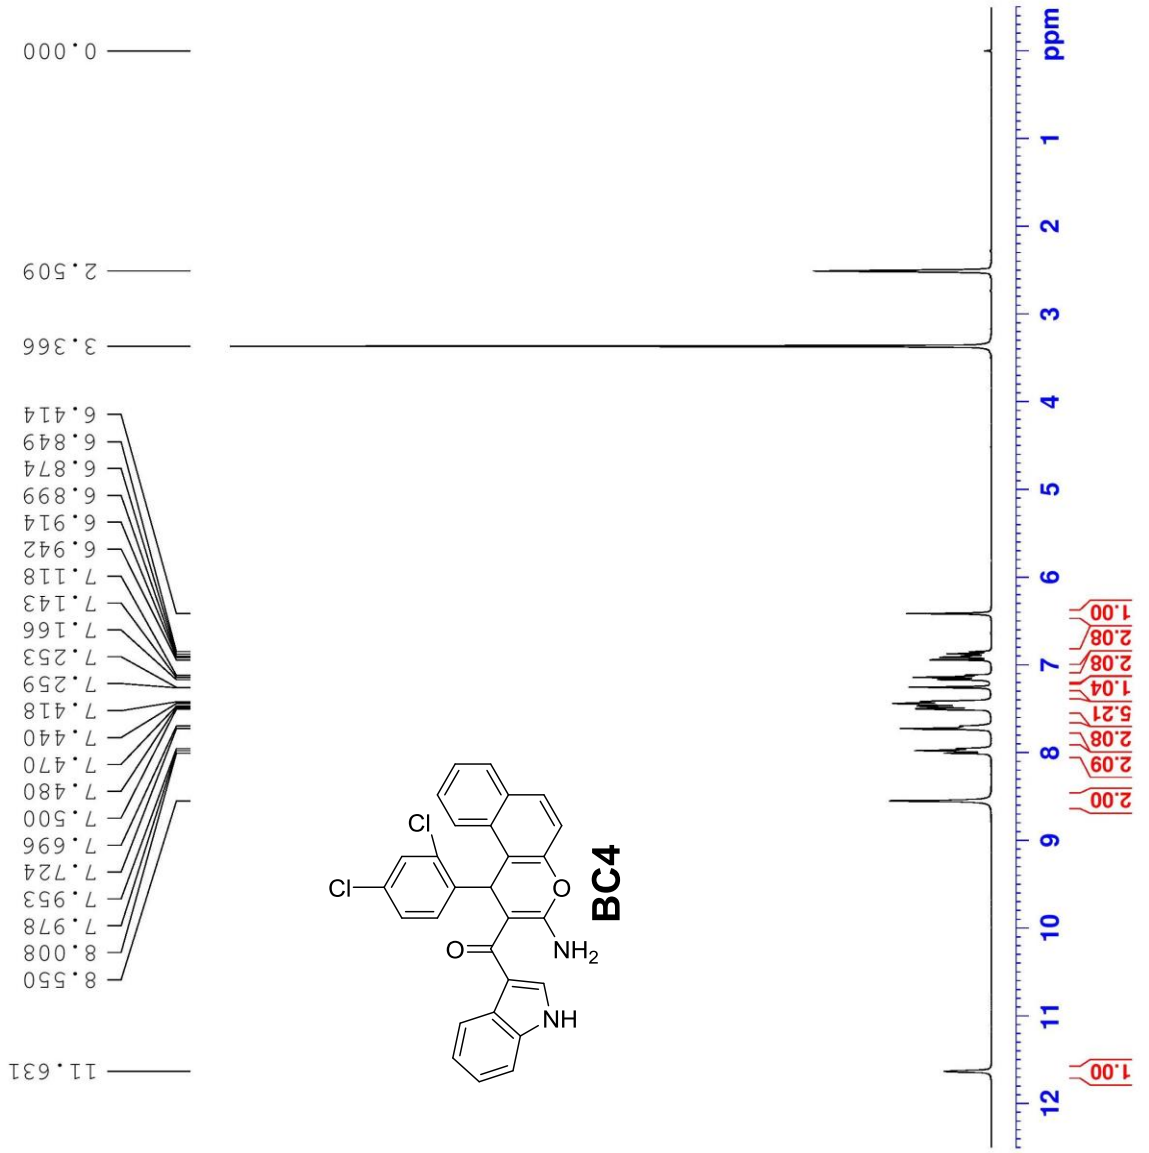

Current Data Parameters  
 NAME 0717B  
 EXPNO 1  
 PROCNO 1

F2 - Acquisition Parameters  
 Date\_ 20150527  
 Time 14.25  
 INSTRUM spect  
 PROBHD 5 mm BBO BB-1H  
 PULPROG zg30  
 TD 65536  
 SOLVENT DMSO  
 NS 16  
 DS 2  
 SWH 6188.119 Hz  
 FIDRES 0.094423 Hz  
 AQ 5.2953587 sec  
 RG 256  
 DW 80.800 usec  
 DE 6.00 usec  
 TE 300.0 K  
 D1 1.00000000 sec  
 TD0 1

==== CHANNEL f1 =====  
 NUC1 1H  
 P1 8.60 usec  
 PL1 -2.00 dB  
 SFO1 300.1318534 MHz

F2 - Processing parameters  
 SI 32768  
 SF 300.1299986 MHz  
 WDW EM  
 SSB 0  
 LB 0.30 Hz  
 GB 0  
 PC 1.00

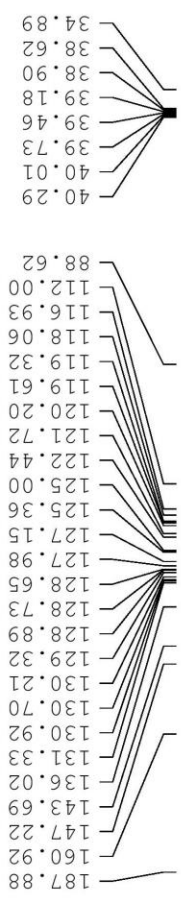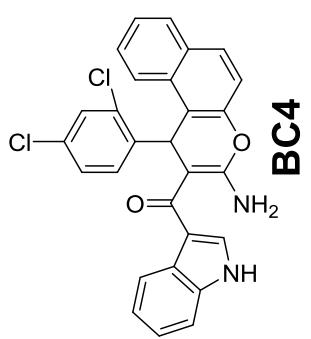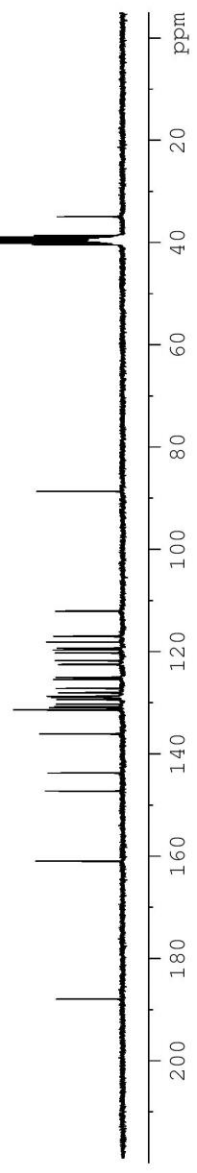

Current Data Parameters  
 NAME 1391M-R  
 EXPNO 1  
 PROCNO 1

F2 - Acquisition Parameters  
 Date\_ 20160219  
 Time 17.47  
 INSTRUM spect  
 PROBHD 5 mm BBO BB-1H  
 PULPROG zgpg30  
 TD 65536  
 SOLVENT DMSO  
 NS 1024  
 DS 4  
 SWH 18028.846 Hz  
 FIDRES 0.275098 Hz  
 AQ 1.8175818 sec  
 RG 228  
 DW 27.733 usec  
 DE 6.00 usec  
 TE 300.0 K  
 D1 2.00000000 sec  
 d11 0.03000000 sec  
 DELTA 1.89999998 sec  
 TD0 1

==== CHANNEL f1 =====  
 NUC1 13C  
 P1 10.00 usec  
 PL1 0.00 dB  
 SFO1 75.4752953 MHz

==== CHANNEL f2 =====  
 CPDPRG2 waltz16  
 NUC2 1H  
 PCPD2 80.00 usec  
 PL2 -2.00 dB  
 PL12 16.98 dB  
 PL13 20.00 dB  
 SFO2 300.1312005 MHz

F2 - Processing parameters  
 SI 32768  
 SF 75.4677867 MHz  
 WDW EM  
 SSB 0  
 LB 1.00 Hz  
 GB 0  
 PC 1.40

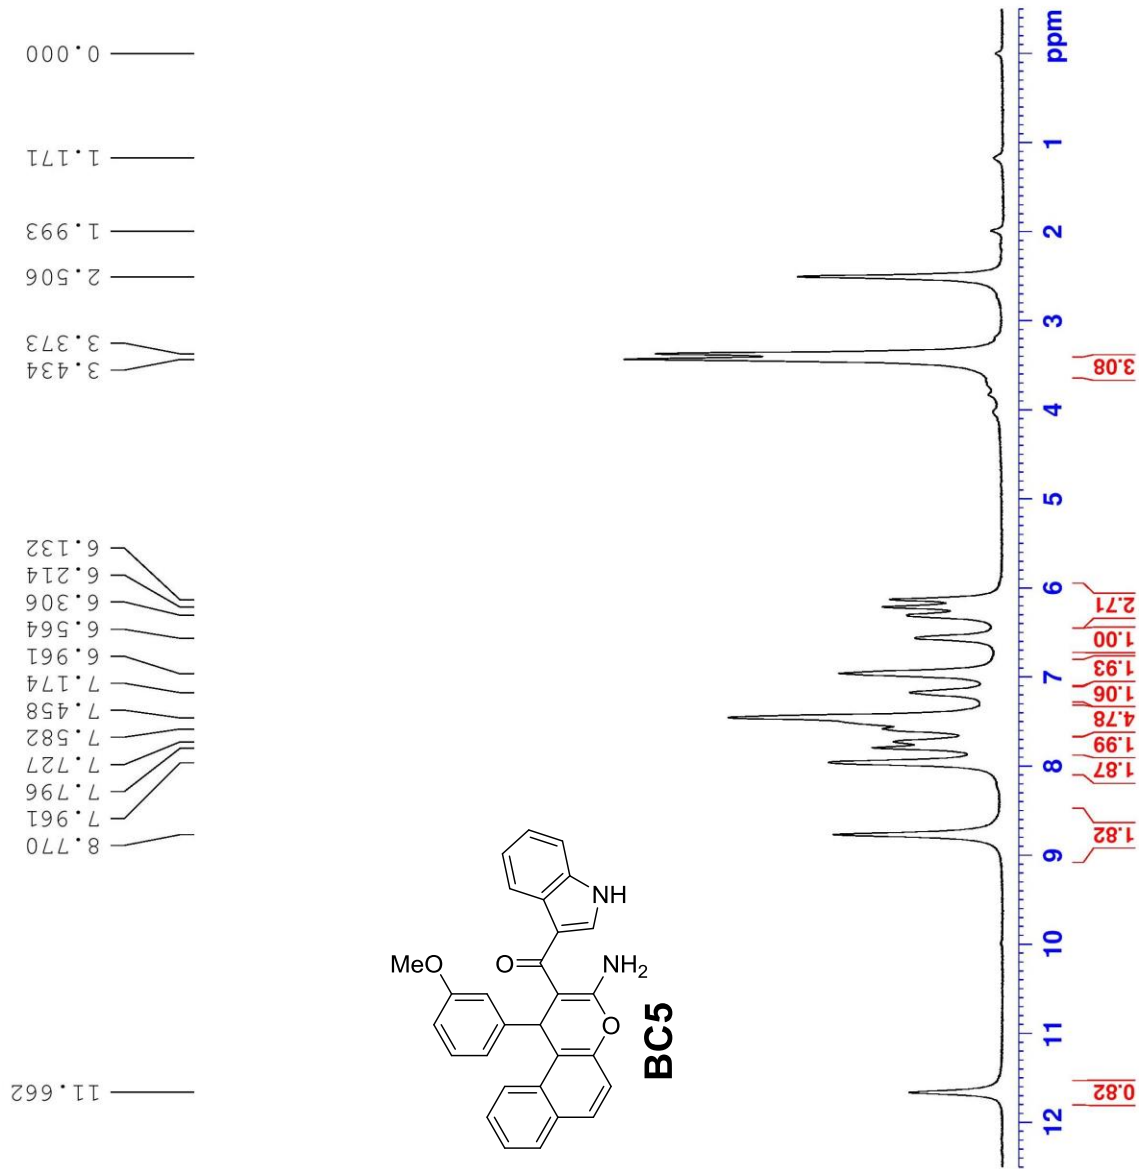

Current Data Parameters  
 NAME 06541  
 EXPNO 1  
 PROCNO 1

F2 - Acquisition Parameters  
 Date\_ 20150525  
 Time 14.56  
 INSTRUM spect  
 PROBHD 5 mm BBO BB-1H  
 PULPROG zg30  
 TD 65536  
 SOLVENT DMSO  
 NS 16  
 DS 2  
 SWH 6188.119 Hz  
 FIDRES 0.094423 Hz  
 AQ 5.2953587 sec  
 RG 181  
 DW 80.800 usec  
 DE 6.00 usec  
 TE 300.0 K  
 D1 1.00000000 sec  
 TD0 1

==== CHANNEL f1 =====  
 NUC1 1H  
 P1 8.60 usec  
 PL1 -2.00 dB  
 SFO1 300.1318534 MHz

F2 - Processing parameters  
 SI 32768  
 SF 300.1299987 MHz  
 WDW EM  
 SSB 0  
 LB 0.30 Hz  
 GB 0  
 PC 1.00

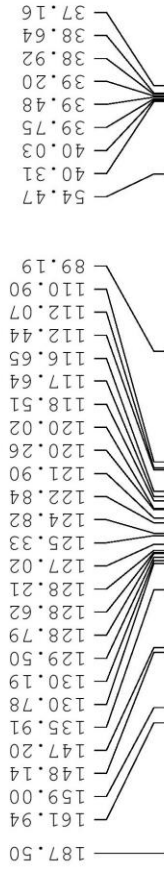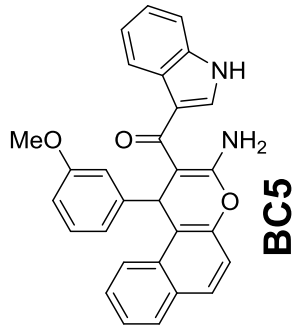

```

Current Data Parameters
NAME      1273T
EXPNO     1
PROCNO    1

F2 - Acquisition Parameters
Date_     20160118
Time      13.02
INSTRUM   spect
PROBHD    5 mm BBO BB-1H
PULPROG   zgpg30
TD         65536
SOLVENT   DMSO
NS         666
DS         4
SMH        18028.846 Hz
FIDRES    0.275098 Hz
AQ         1.8175818 sec
RG         228
DW         27.733 usec
DE         6.00 usec
TE         300.0 K
D1         2.00000000 sec
d11        0.03000000 sec
DELTA     1.89999998 sec
TD0        1

===== CHANNEL f1 =====
NUC1       13C
P1         10.00 usec
PL1        0.00 dB
SFO1       75.4752953 MHz

===== CHANNEL f2 =====
CPDPRG2   waltz16
NUC2       1H
PCPD2      80.00 usec
PL2        -2.00 dB
PL12       16.98 dB
PL13       20.00 dB
SFO2       300.1312005 MHz

F2 - Processing parameters
SI         32768
SF         75.4677867 MHz
WDW        EM
SSB        0
LB         1.00 Hz
GB         0
PC         1.40
  
```

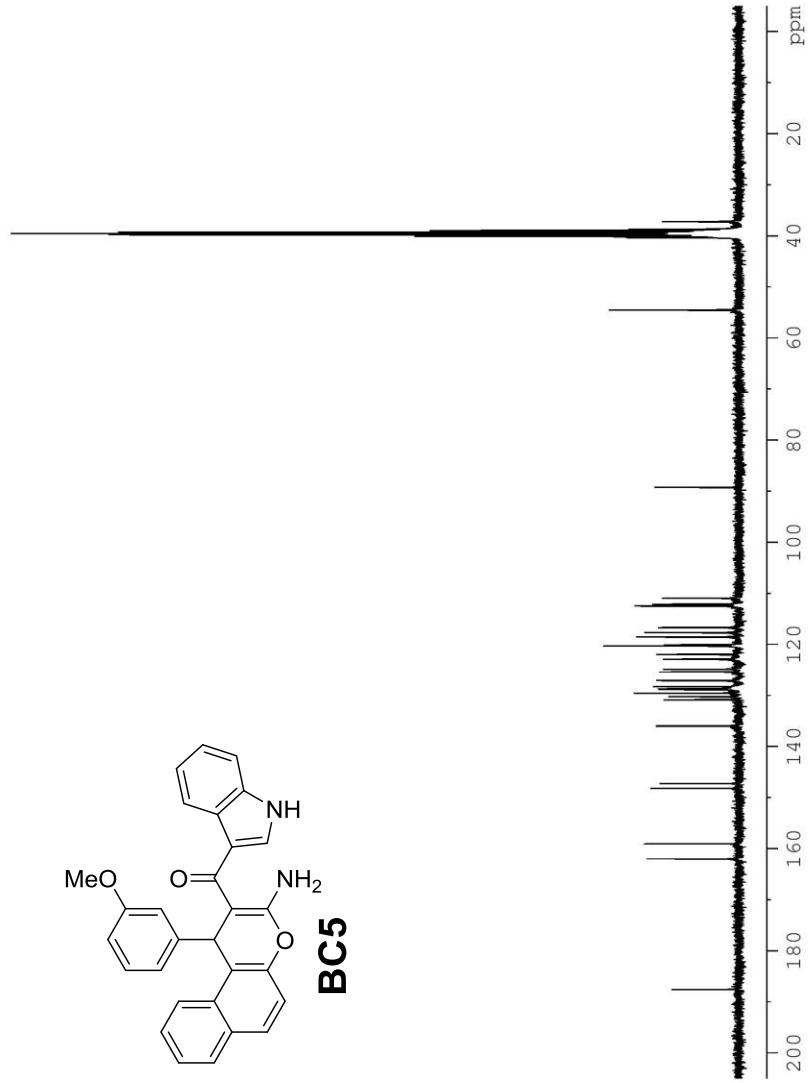

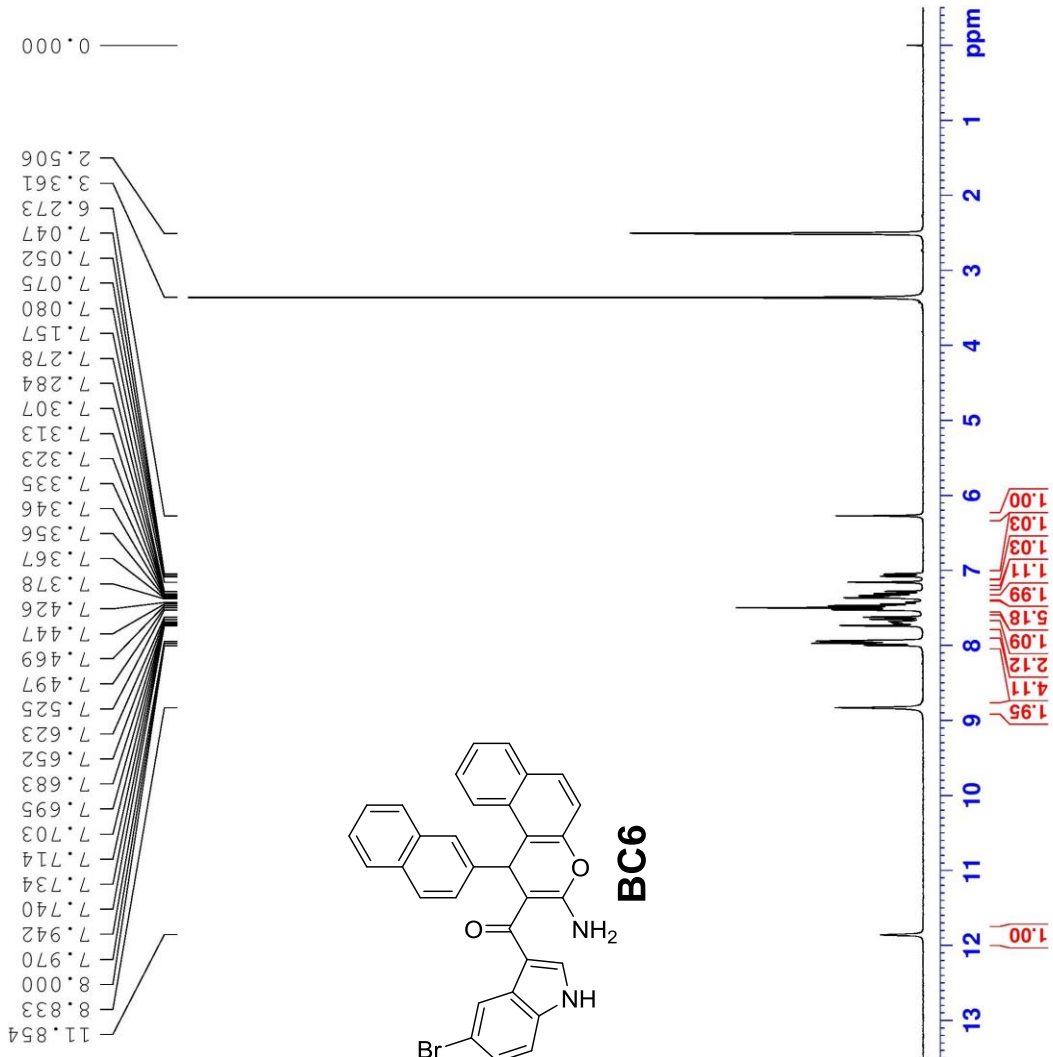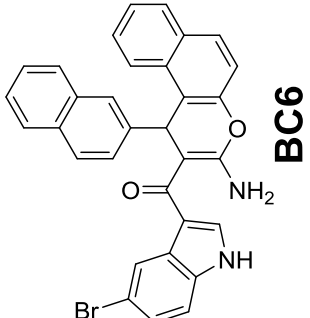

Current Data Parameters  
 NAME 0717E  
 EXPNO 1  
 PROCNO 1

F2 - Acquisition Parameters  
 Date\_ 20150527  
 Time 14.49  
 INSTRUM spect  
 PROBHD 5 mm BBO BB-1H  
 PULPROG zg30  
 TD 65536  
 SOLVENT DMSO  
 NS 16  
 DS 2  
 SWH 6188.119 Hz  
 FIDRES 0.094423 Hz  
 AQ 5.2953587 sec  
 RG 287  
 DW 80.800 usec  
 DE 6.00 usec  
 TE 300.0 K  
 D1 1.00000000 sec  
 TD0 1

===== CHANNEL f1 =====  
 NUC1 1H  
 P1 8.60 usec  
 PL1 -2.00 dB  
 SFO1 300.1318534 MHz

F2 - Processing parameters  
 SI 32768  
 SF 300.1299991 MHz  
 WDW EM  
 SSB 0  
 LB 0.30 Hz  
 GB 0  
 PC 1.00

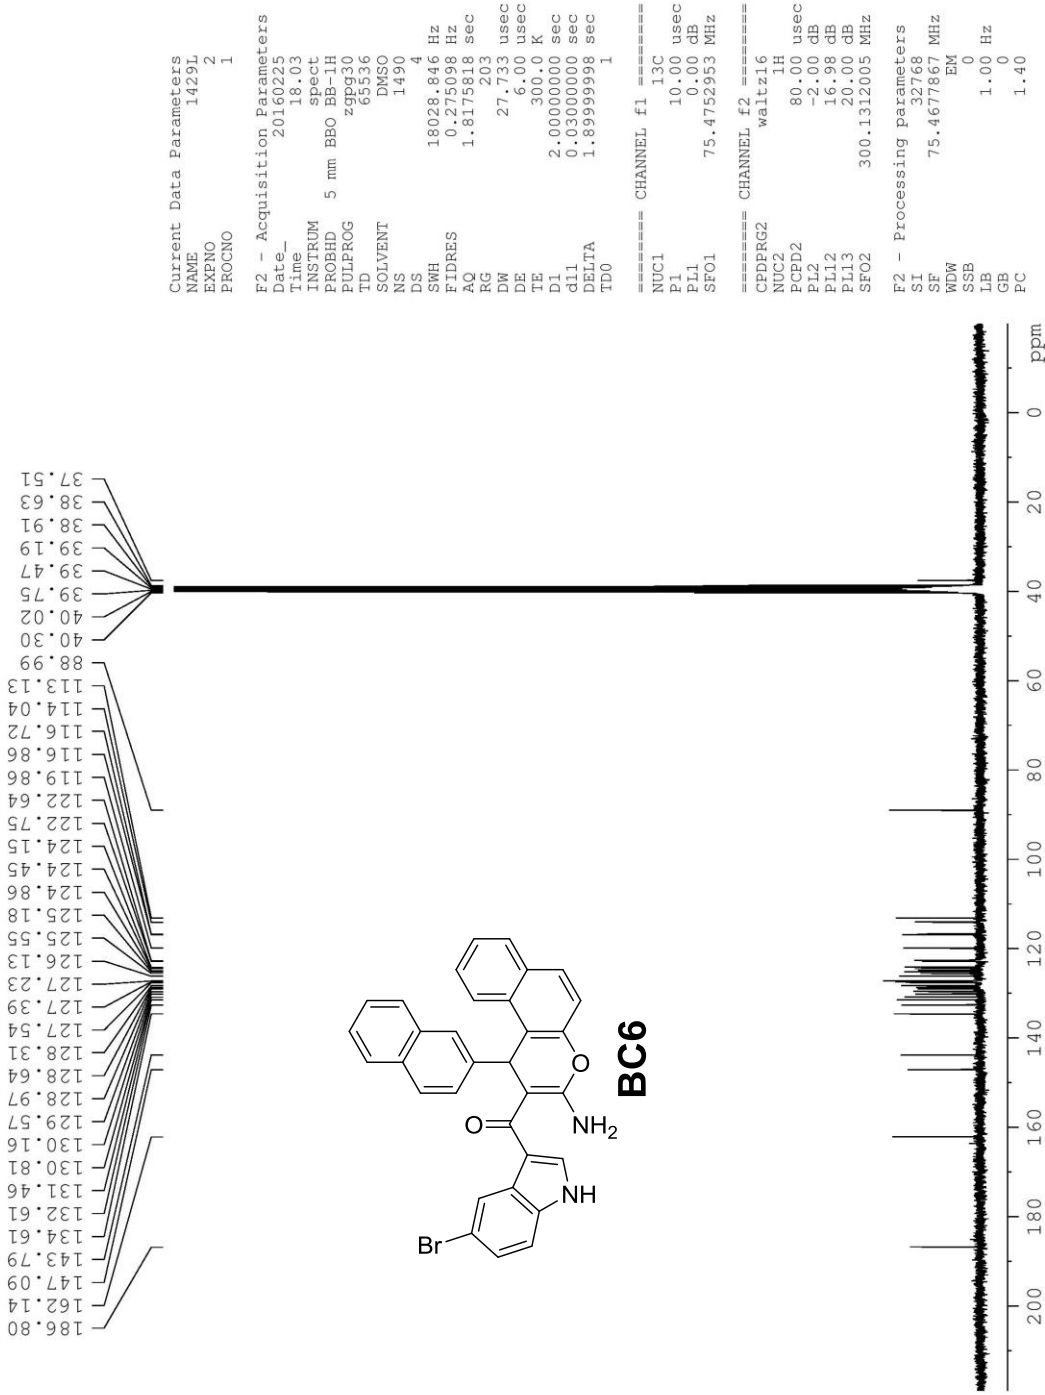

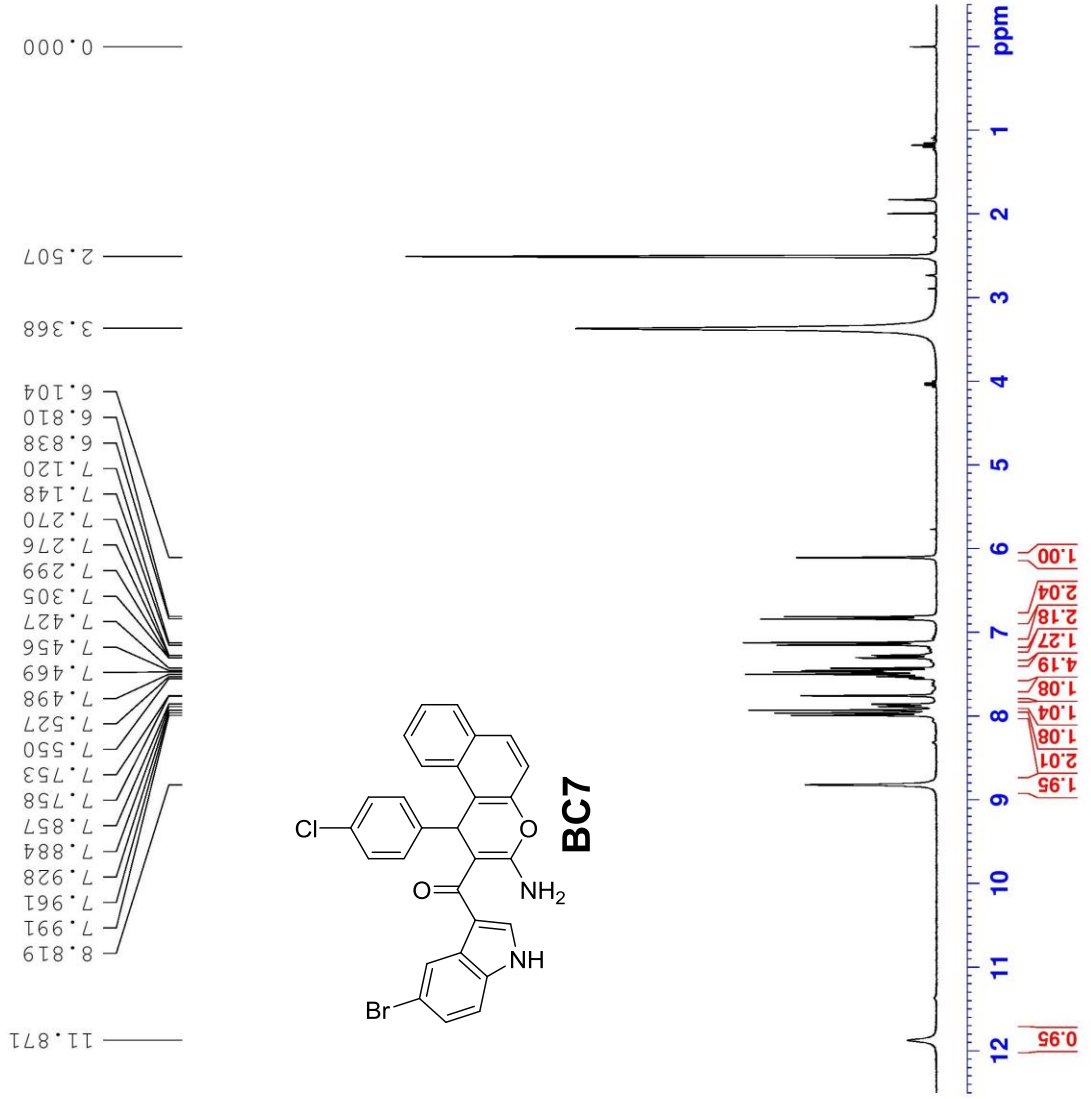

Current Data Parameters  
 NAME 0717C  
 EXPNO 1  
 PROCNO 1

F2 - Acquisition Parameters  
 Date\_ 20150527  
 Time 14.35  
 INSTRUM spect  
 PROBHD 5 mm BBO BB-1H  
 PULPROG zg30  
 TD 65536  
 SOLVENT DMSO  
 NS 16  
 DS 2  
 SWH 6188.113 Hz  
 FIDRES 0.094423 Hz  
 AQ 5.2953587 sec  
 RG 287  
 DW 80.800 usec  
 DE 6.00 usec  
 TE 300.0 K  
 D1 1.00000000 sec  
 TD0 1

===== CHANNEL f1 =====  
 NUC1 1H  
 P1 8.60 usec  
 PL1 -2.00 dB  
 SFO1 300.1318534 MHz

F2 - Processing parameters  
 SI 32768  
 SF 300.1299990 MHz  
 WDW EM  
 SSB 0  
 LB 0.30 Hz  
 GB 0  
 PC 1.00

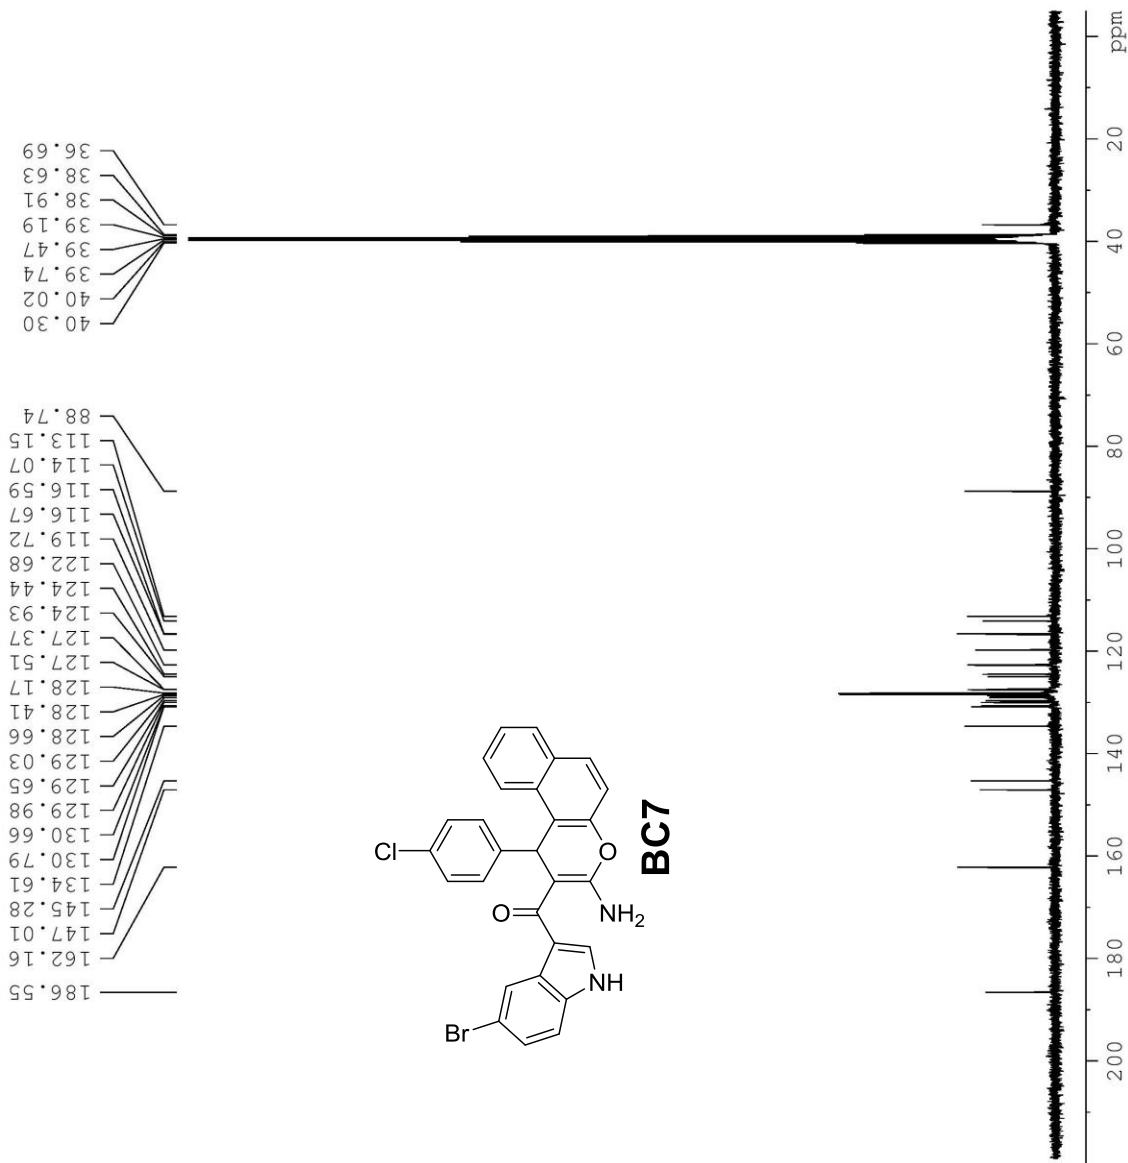

Current Data Parameters  
 NAME 1429B  
 EXPNO 1  
 PROCNO 1

F2 - Acquisition Parameters  
 Date\_ 20160222  
 Time 12.54  
 INSTRUM spect  
 PROBHD 5 mm BBO BB-1H  
 PULPROG zgpg30  
 TD 65536  
 SOLVENT DMSO  
 NS 1024  
 DS 4  
 SWH 18028.846 Hz  
 FIDRES 0.275098 Hz  
 AQ 1.8175818 sec  
 RG 256  
 DW 27.733 usec  
 DE 6.00 usec  
 TE 300.0 K  
 D1 2.00000000 sec  
 d11 0.03000000 sec  
 DELTA 1.89999998 sec  
 ID0 1

==== CHANNEL f1 =====  
 NUC1 13C  
 P1 10.00 usec  
 PL1 0.00 dB  
 SFO1 75.4752953 MHz

==== CHANNEL f2 =====  
 CPDPRG2 waltz16  
 NUC2 1H  
 PCPD2 80.00 usec  
 PL2 -2.00 dB  
 PL12 16.98 dB  
 PL13 20.00 dB  
 SFO2 300.1312005 MHz

F2 - Processing parameters  
 SI 32768  
 SF 75.4677867 MHz  
 WDW EM  
 SSB 0  
 LB 1.00 Hz  
 GB 0  
 PC 1.40



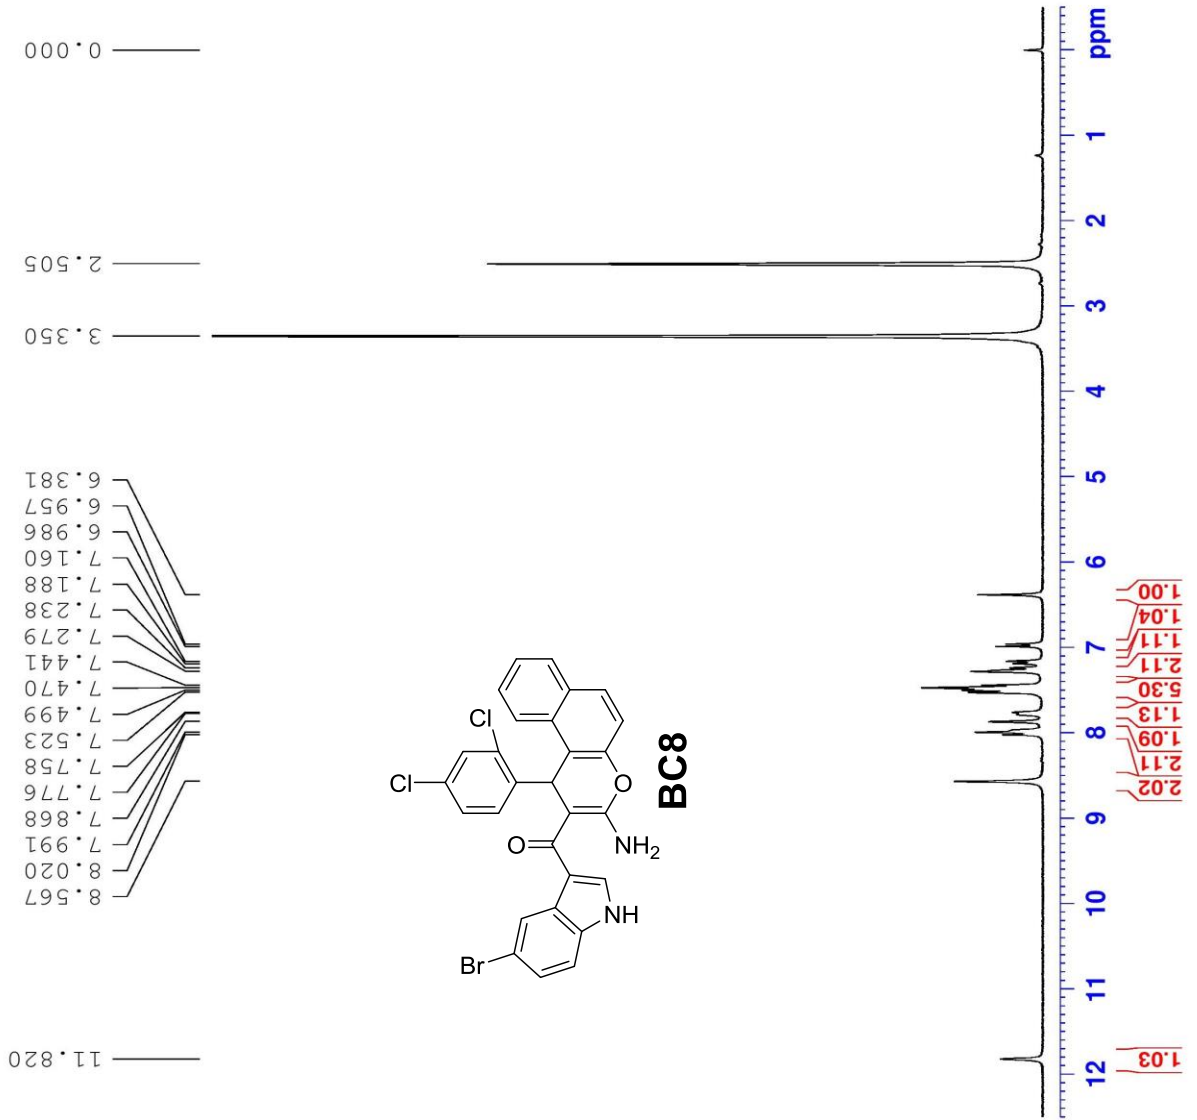

Current Data Parameters  
 NAME 0717N  
 EXPNO 1  
 PROCNO 1

F2 - Acquisition Parameters  
 Date\_ 20150606  
 Time 16.24  
 INSTRUM spect  
 PROBHD 5 mm BBO BB-1H  
 PULPROG zg30  
 TD 65536  
 SOLVENT DMSO  
 NS 16  
 DS 2  
 SWH 6188.119 Hz  
 FIDRES 0.094423 Hz  
 AQ 5.2953587 sec  
 RG 322  
 DW 80.800 usec  
 DE 6.00 usec  
 TE 300.0 K  
 D1 1.0000000 sec  
 TD0 1

==== CHANNEL f1 =====  
 NUC1 1H  
 P1 8.60 usec  
 PL1 -2.00 dB  
 SF01 300.1318534 MHz

F2 - Processing parameters  
 SI 32768  
 SF 300.1299992 MHz  
 WDW EM  
 SSB 0  
 LB 0.30 Hz  
 GB 0  
 PC 1.00

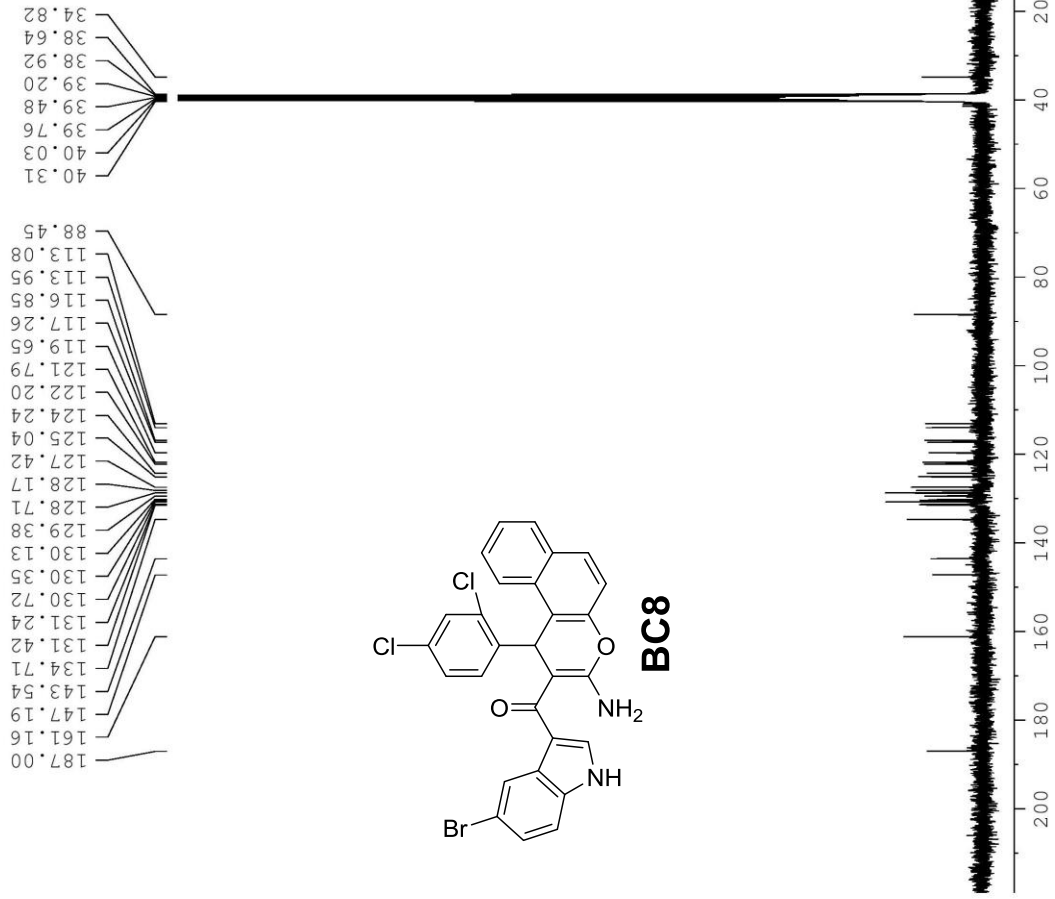

```

Current Data Parameters
NAME      1429C-R
EXPNO    1
PROCNO   1

F2 - Acquisition Parameters
Date_    20160223
Time     18.48
INSTRUM  spect
PROBHD   5 mm BBO BB-1H
PULPROG  zgpg30
TD       65536
SOLVENT  DMSO
NS       2048
DS       4
SMH      18028.846 Hz
FIDRES   0.275098 Hz
AQ       1.8175818 sec
RG       203
DW       27.733 usec
DE       6.00 usec
TE       300.0 K
D1       2.00000000 sec
d11      0.03000000 sec
DELTA    1.89999998 sec
TD0      1

===== CHANNEL f1 =====
NUC1     13C
P1       10.00 usec
PL1      0.00 dB
SFO1     75.4752953 MHz

===== CHANNEL f2 =====
CPDPRG2  waltz16
NUC2     1H
PCPD2    80.00 usec
PL2      -2.00 dB
PL12     16.98 dB
PL13     20.00 dB
SFO2     300.1312005 MHz

F2 - Processing parameters
SI       32768
SF       75.4677867 MHz
WDW      EM
SSB      0
LB       1.00 Hz
GB       0
PC       1.40
  
```

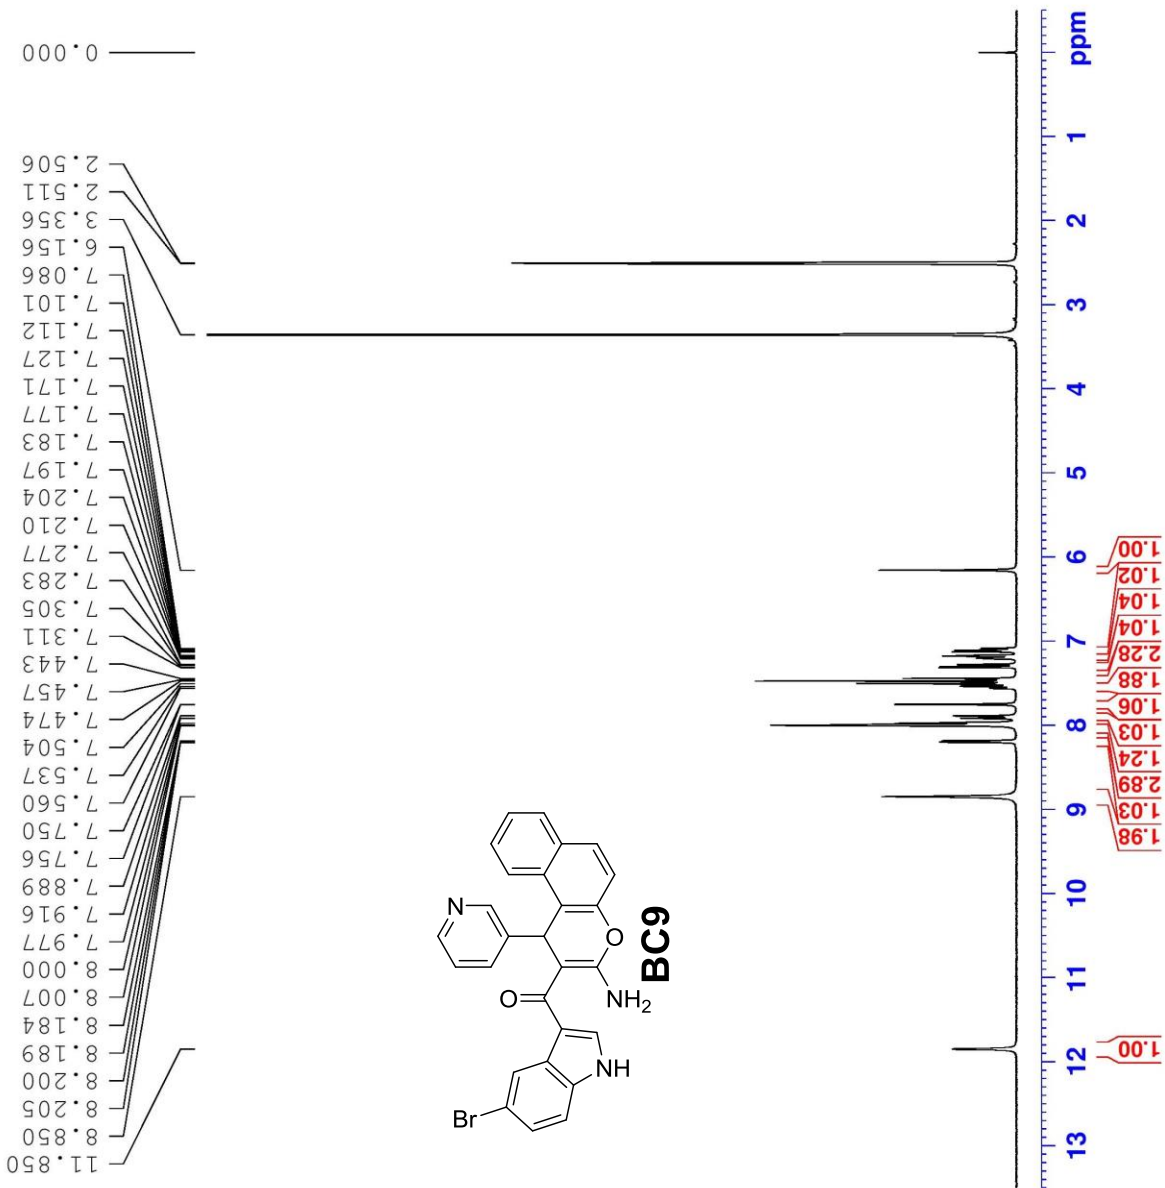

Current Data Parameters  
 NAME 0717A  
 EXPNO 1  
 PROCNO 1

F2 - Acquisition Parameters  
 Date\_ 20150527  
 Time\_ 14.16  
 INSTRUM spect  
 PROBHD 5 mm BBO BB-1H  
 PULPROG zg30  
 TD 65536  
 SOLVENT DMSO  
 NS 16  
 DS 2  
 SWH 6188.119 Hz  
 FIDRES 0.094423 Hz  
 AQ 5.2953587 sec  
 RG 287  
 DW 80.800 usec  
 DE 6.00 usec  
 TE 300.0 K  
 DI 1.00000000 sec  
 TD0 1

==== CHANNEL f1 =====  
 NUC1 1H  
 P1 8.60 usec  
 PL1 -2.00 dB  
 SFO1 300.1318534 MHz

F2 - Processing parameters  
 SI 32768  
 SF 300.1299991 MHz  
 WDW EM  
 SSB 0  
 LB 0.30 Hz  
 GB 0  
 PC 1.00

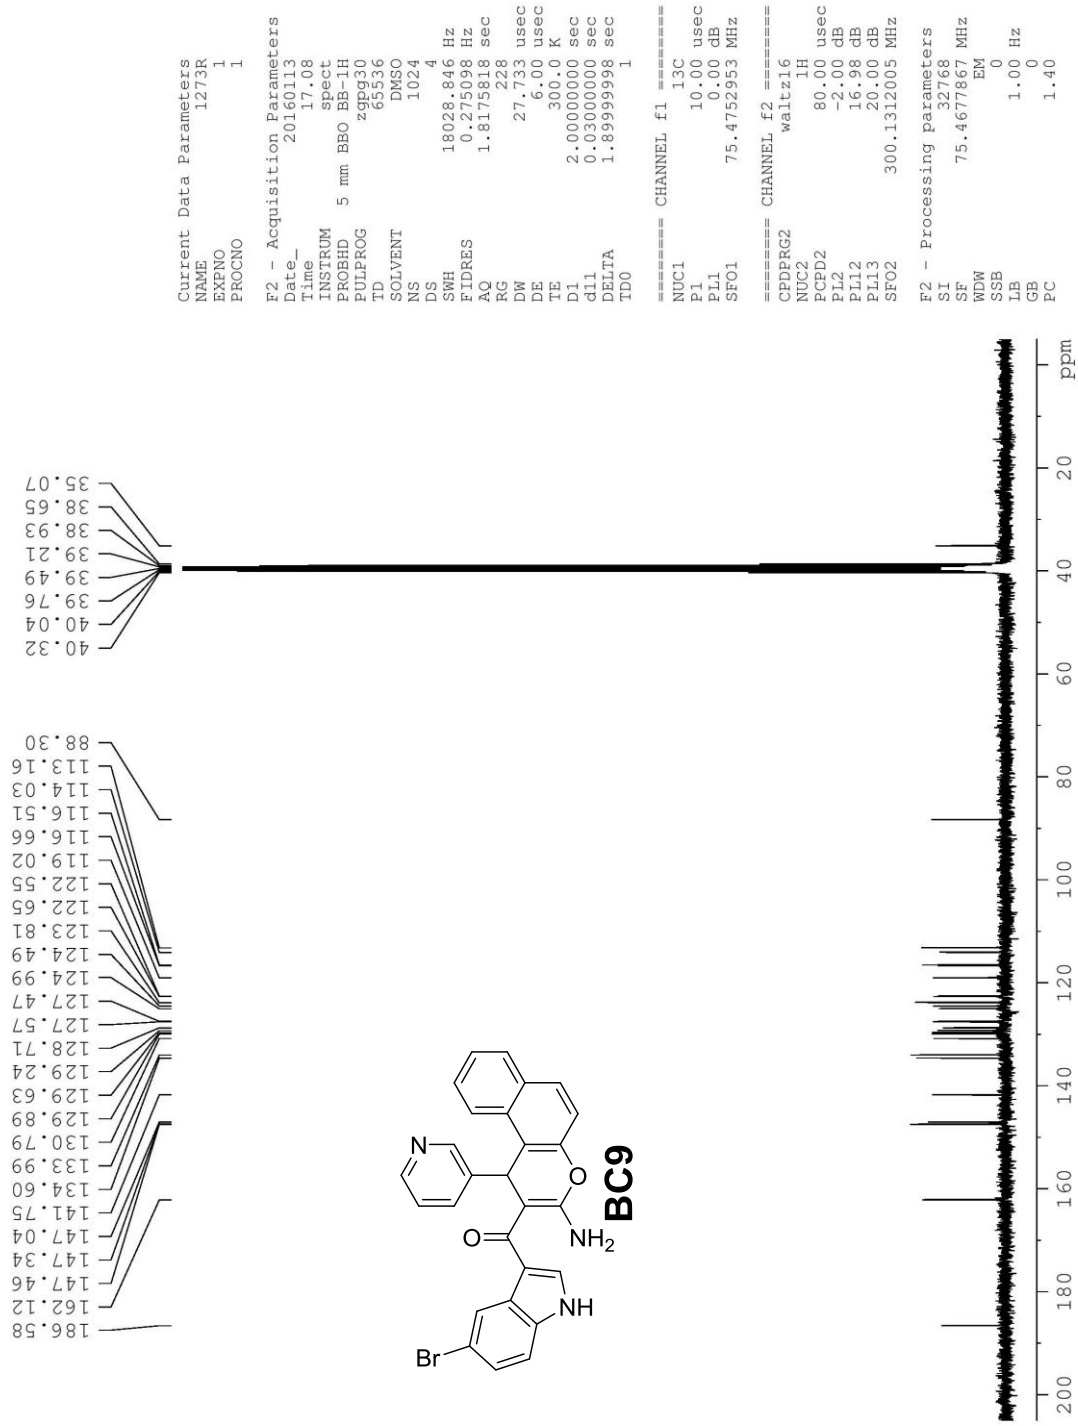

```

Current Data Parameters
NAME      1273R
EXPNO    1
PROCNO   1

F2 - Acquisition Parameters
Date_    20160113
Time     17.08
INSTRUM  spect
PROBHD   5 mm BBO BB-1H
PULPROG  zgpg30
TD       65536
SOLVENT  DMSO
NS       1024
DS       4
SWH      18028.846 Hz
FIDRES   0.275098 Hz
AQ       1.8175818 sec
RG       228
DW       27.733 usec
DE       6.00 usec
TE       300.0 K
D1       2.0000000 sec
d11      0.0300000 sec
DELTA    1.8999999 sec
TD0      1

===== CHANNEL f1 =====
NUC1      13C
P1       10.00 usec
PL1      0.00 dB
SFO1     75.4752953 MHz

===== CHANNEL f2 =====
CPDPRG2  waltz16
NUC2      1H
PCPD2    80.00 usec
PL2      -2.00 dB
PL12     16.98 dB
PL13     20.00 dB
SFO2     300.1312005 MHz

F2 - Processing parameters
SI        32768
SF       75.4677867 MHz
WDW       EM
SSB       0
LB        1.00 Hz
GB         0
PC        1.40

```

7.663  
 7.659  
 7.652  
 7.637  
 7.634  
 7.630  
 7.622  
 7.495  
 7.489  
 7.471  
 7.449  
 7.443  
 7.349  
 7.343  
 7.332  
 7.327  
 7.321  
 7.313  
 7.306  
 7.302  
 7.298  
 7.263  
 7.221  
 7.213  
 7.207  
 7.191  
 7.185  
 4.719  
 4.657

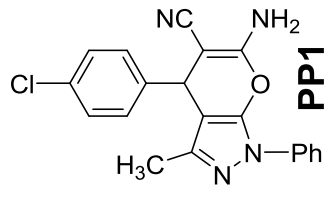

Current Data Parameters  
 NAME 0170E  
 EXPNO 1  
 PROCNO 1  
 F2 - Acquisition Parameters  
 Date\_ 20150220  
 Time 12.33  
 INSTRUM spect  
 PROBHD 5 mm BBO BB-1H  
 PULPROG zg30  
 TD 65536  
 SOLVENT CDCl3  
 NS 16  
 DS 2  
 SWH 6188.119 Hz  
 FIDRES 0.094423 Hz  
 AQ 5.2953587 sec  
 RG 406  
 DW 80.800 usec  
 DE 6.00 usec  
 TE 300.0 K  
 DI 1.00000000 sec  
 TD0 1  
 ===== CHANNEL f1 =====  
 NUC1 1H  
 PL 8.60 usec  
 PL1 -2.00 dB  
 SFO1 300.1318534 MHz  
 F2 - Processing parameters  
 SI 32768  
 SF 300.1300054 MHz  
 WDW EM  
 SSB 0  
 LB 0.30 Hz  
 GB 0  
 PC 1.00

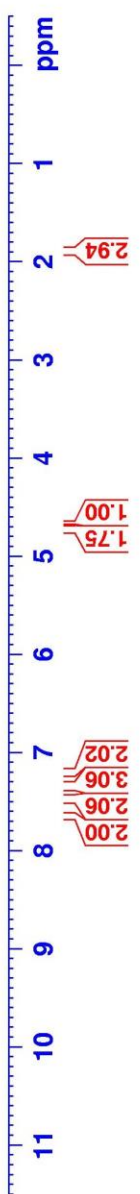

159.13  
145.95  
144.02  
141.21  
137.57  
132.89  
129.23  
129.12  
128.73  
126.46  
120.91  
119.64  
97.86  
77.74  
77.31  
76.88  
60.80  
40.83  
40.55  
40.28  
40.00  
39.72  
39.44  
39.15  
36.86  
12.83

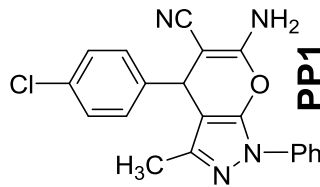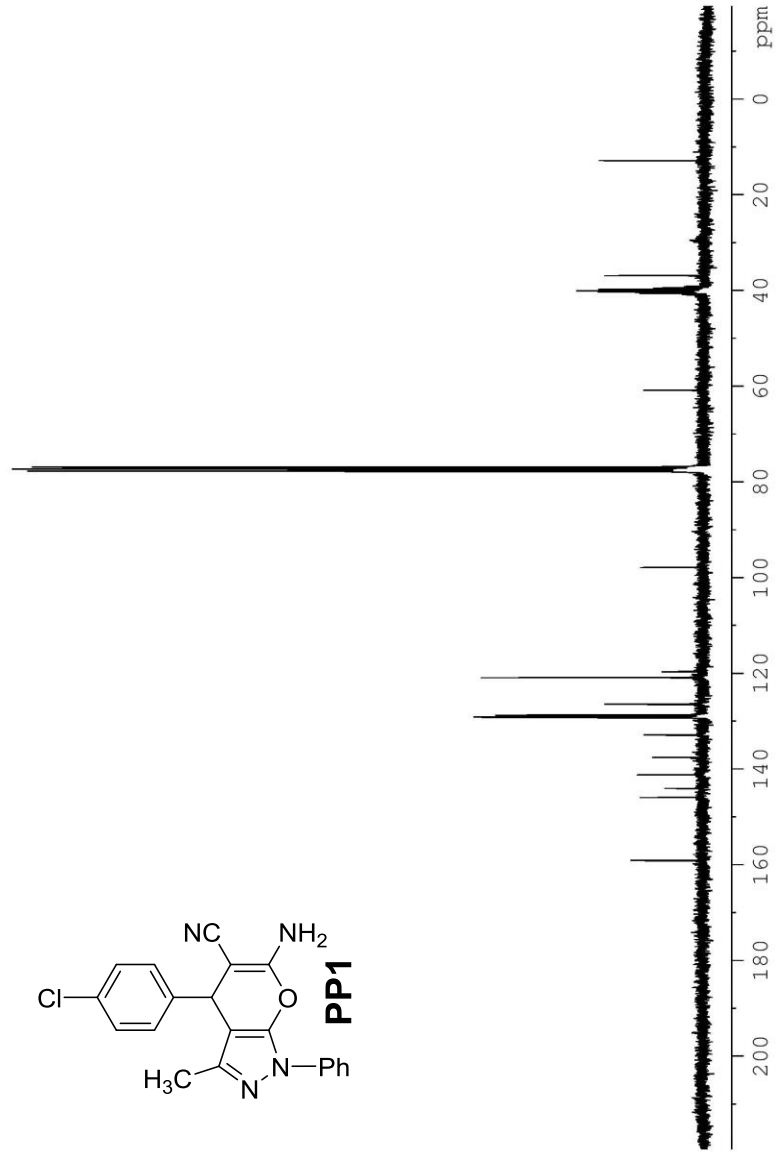

Current Data Parameters  
NAME 1429H  
EXPNO 1  
PROCNO 1

F2 - Acquisition Parameters  
Date\_ 20160224  
Time 15.27  
INSTRUM spect  
PROBHD 5 mm BBO BB-1H  
PULPROG zgpg30  
TD 65336  
SOLVENT CDC13  
NS 1024  
DS 4  
SWH 18028.846 Hz  
FIDRES 0.275098 Hz  
AQ 1.8175818 sec  
RG 256  
DW 27.733 usec  
DE 6.00 usec  
TE 300.0 K  
D1 2.00000000 sec  
d11 0.03000000 sec  
DELTA 1.89999998 sec  
TD0 1

==== CHANNEL f1 =====  
NUC1 13C  
P1 10.00 usec  
PL1 0.00 dB  
SFO1 75.4752953 MHz

==== CHANNEL f2 =====  
CPDPRG2 waltz16  
NUC2 1H  
PCPD2 80.00 usec  
PL2 -2.00 dB  
PL12 16.98 dB  
PL13 20.00 dB  
SFO2 300.1312005 MHz

F2 - Processing parameters  
SI 32768  
SF 75.4677490 MHz  
WDW EM  
SSB 0  
LB 1.00 Hz  
GB 0  
PC 1.40

```

Current Data Parameters
NAME          0368C
EXPNO        1
PROCNO       1

F2 - Acquisition Parameters
Date_        20150323
Time         15.42
INSTRUM      spect
PROBHD       5 mm BBO BB-1H
PULPROG      zg30
TD           65536
SOLVENT      CDCl3
NS           16
DS           2
SWH          6188.119 Hz
FIDRES       0.094423 Hz
AQ           5.2953587 sec
RG           406
DE           80.800 usec
TE           300.0 K
D1           1.00000000 sec
TD0          1

===== CHANNEL f1 =====
NUC1         1H
P1           8.60 usec
PL1         -2.00 dB
SFO1        300.1318534 MHz

F2 - Processing parameters
SI           32768
SF          300.1300266 MHz
WDW          EM
SSB          0
LB           0.30 Hz
GB           0
PC           1.00

```

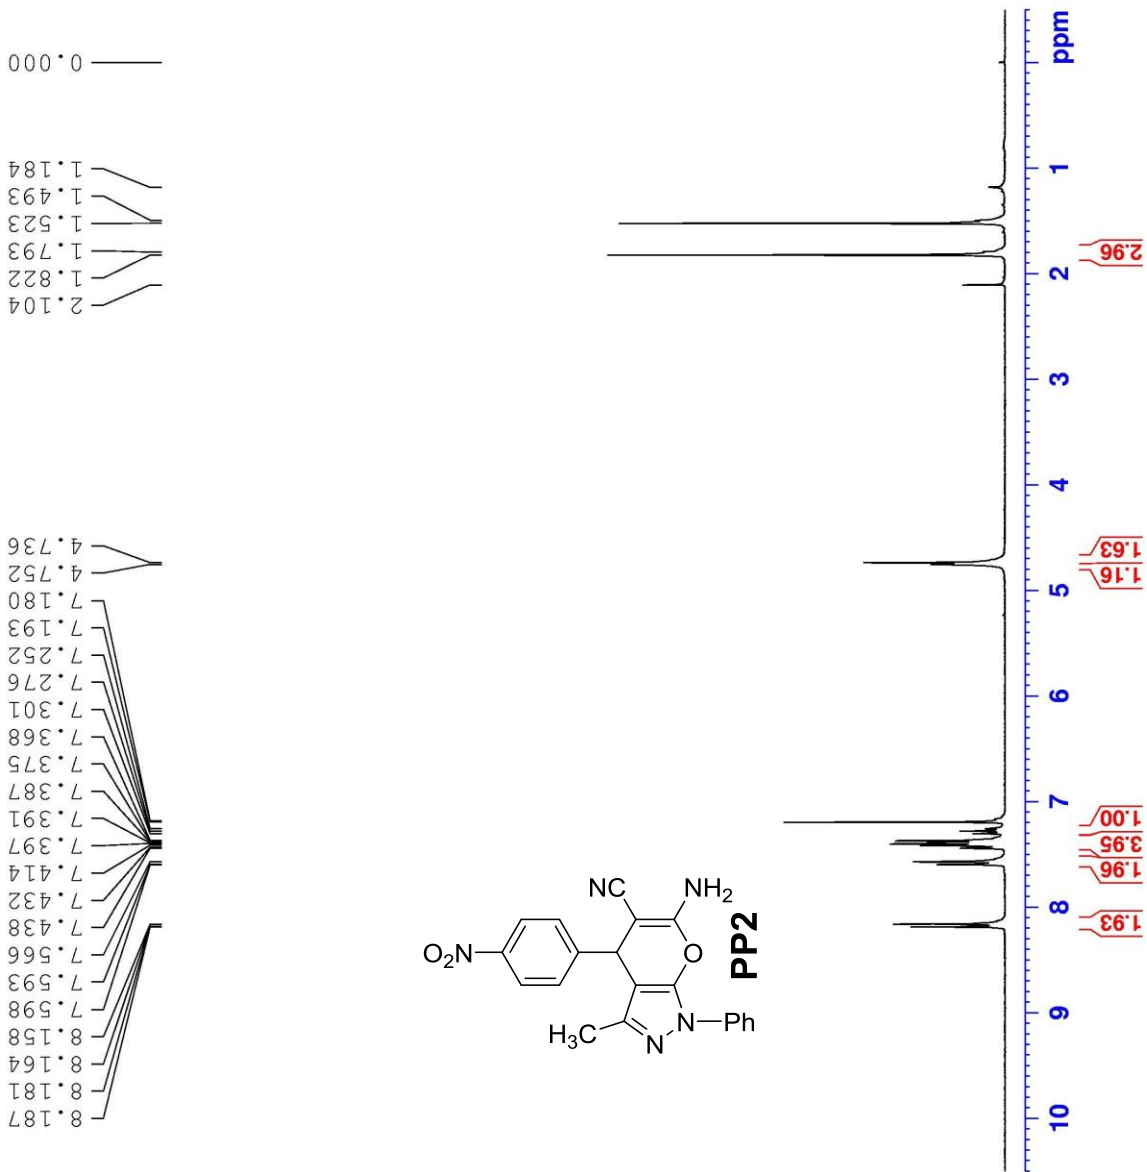

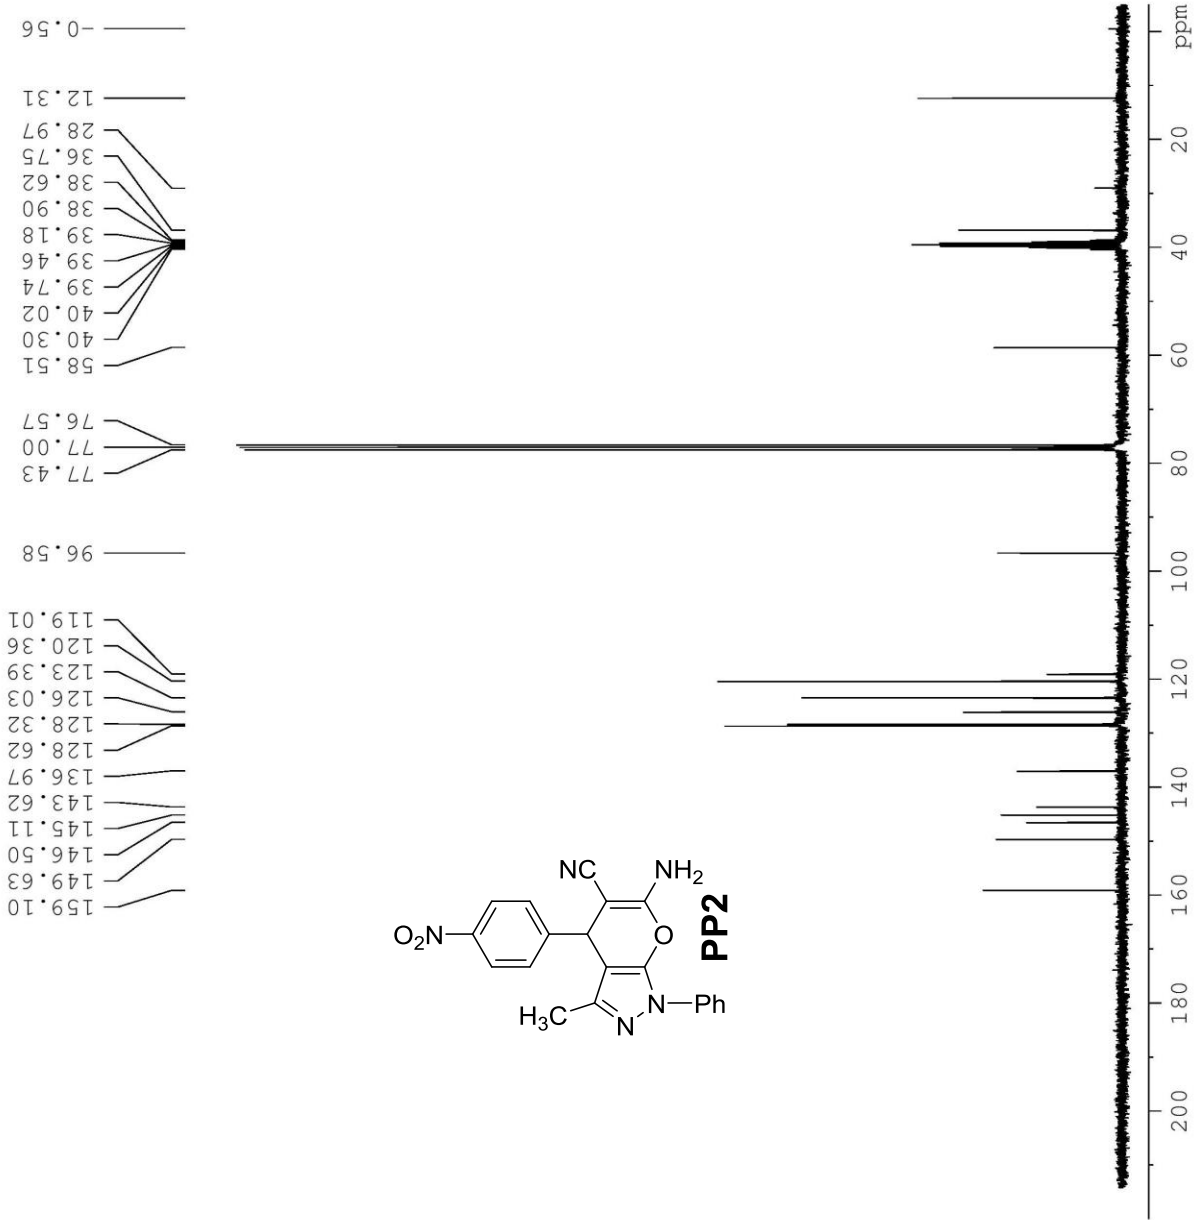

Current Data Parameters  
 NAME 1429G  
 EXPNO 1  
 PROCNO 1

F2 - Acquisition Parameters

Date\_ 20160224  
 Time 14.14  
 INSTRUM spect  
 PROBHD 5 mm BBO BB-1H  
 PULPROG zgpg30  
 TD 65536  
 SOLVENT CDCl3  
 NS 886  
 DS 4  
 SWH 18028.846 Hz  
 FIDRES 0.275098 Hz  
 AQ 1.8175818 sec  
 RG 256  
 DW 27.733 usec  
 DE 6.00 usec  
 TE 300.0 K  
 D1 2.0000000 sec  
 d11 0.0300000 sec  
 DELTA 1.8999998 sec  
 TD0 1

==== CHANNEL f1 =====  
 NUC1 13C  
 P1 10.00 usec  
 PL1 0.00 dB  
 SFO1 75.4752953 MHz

==== CHANNEL f2 =====  
 CPDPRG2 waltz16  
 NUC2 1H  
 PCPD2 80.00 usec  
 PL2 -2.00 dB  
 PL12 16.98 dB  
 PL13 20.00 dB  
 SFO2 300.1312005 MHz

F2 - Processing parameters  
 SI 32768  
 SF 75.4681536 MHz  
 WDW EM  
 SSB 0  
 LB 1.00 Hz  
 GB 0  
 PC 1.40



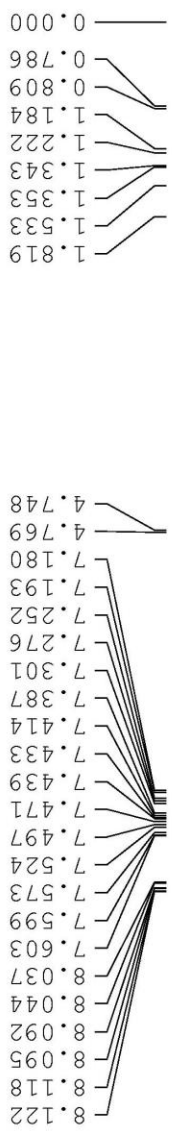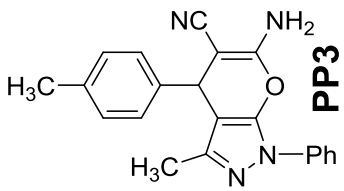

Current Data Parameters  
 NAME 0368E  
 EXPNO 1  
 PROCNO 1

F2 - Acquisition Parameters  
 Date\_ 20150324  
 Time 14.34  
 INSTRUM spect  
 PROBHD 5 mm BBO BB-1H  
 PULPROG zg30  
 TD 65536  
 SOLVENT CDCl3  
 NS 16  
 DS 2  
 SWH 6188.119 Hz  
 FIDRES 0.094423 Hz  
 AQ 5.2953587 sec  
 RG 362  
 DW 80.800 usec  
 DE 6.00 usec  
 TE 300.0 K  
 D1 1.00000000 sec  
 TDO 1

===== CHANNEL f1 =====  
 NUC1 1H  
 P1 8.60 usec  
 PL1 -2.00 dB  
 SFO1 300.1318534 MHz

F2 - Processing parameters  
 SI 32768  
 SF 300.1300265 MHz  
 WDW EM  
 SSB 0  
 LB 0.30 Hz  
 GB 0  
 PC 1.00

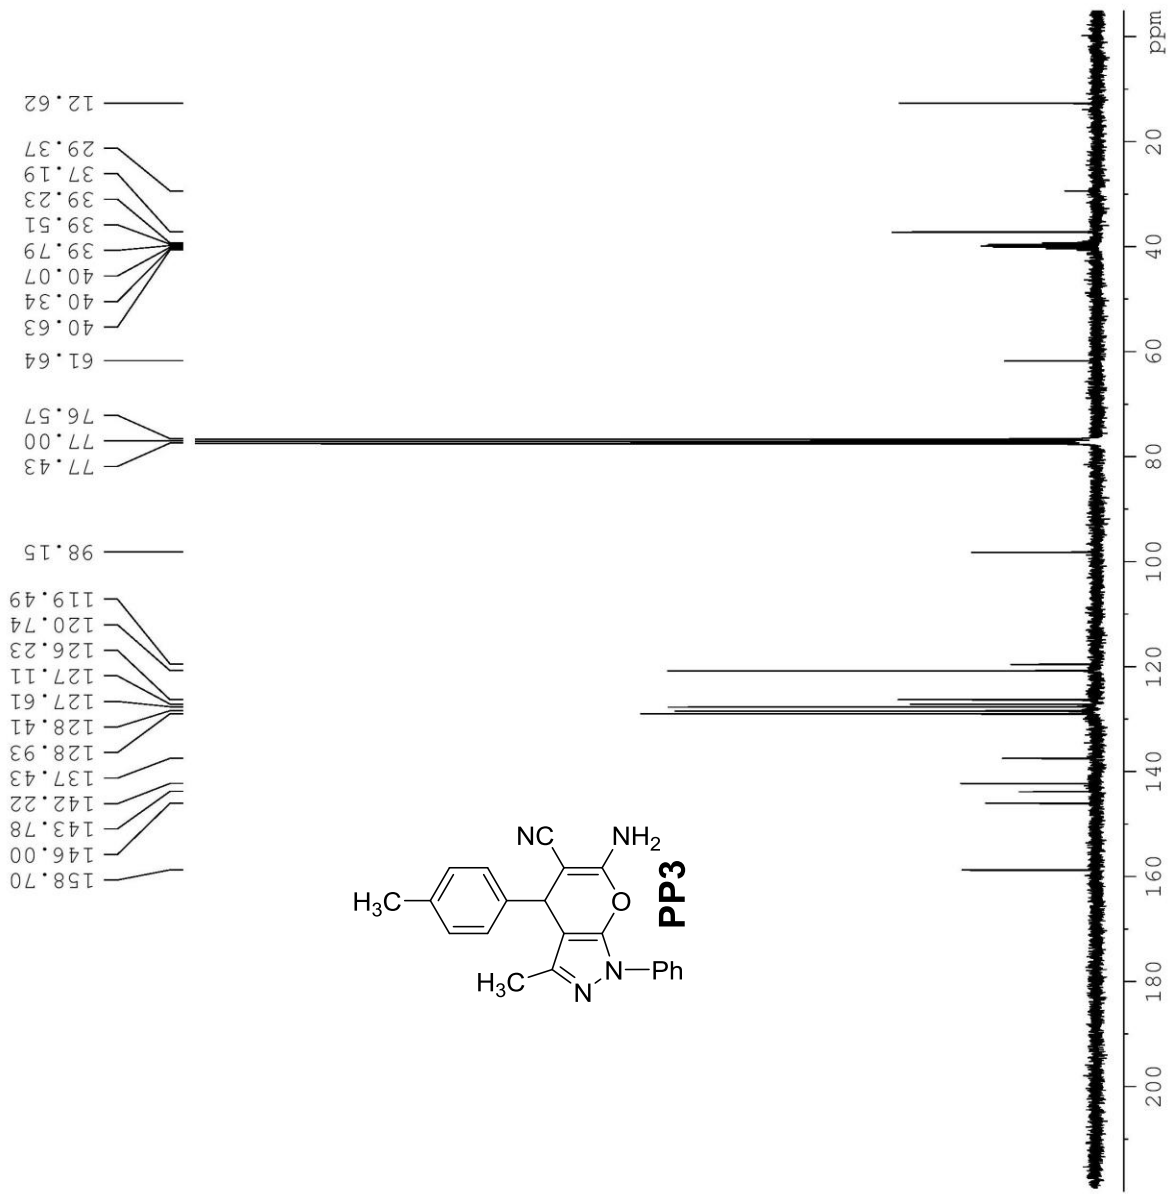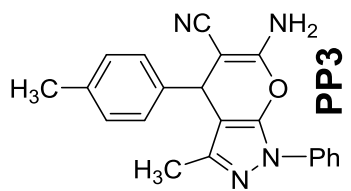

```

Current Data Parameters
NAME      1429E
EXPNO    1
PROCNO   1

F2 - Acquisition Parameters
Date_    20160224
Time     11.19
INSTRUM  spect
PROBHD   5 mm BBO BB-1H
PULPROG  zgpg30
TD       65536
SOLVENT  CDCl3
NS       890
DS       4
SWH      18028.846 Hz
FIDRES   0.275098 Hz
AQ       1.8175818 sec
RG       287
DW       27.733 usec
DE       6.00 usec
TE       300.0 K
D1       2.0000000 sec
d11      0.0300000 sec
DELTA    1.8999998 sec
TD0      1

===== CHANNEL f1 =====
NUC1     13C
P1       10.00 usec
PL1      0.00 dB
SFO1     75.4752953 MHz

===== CHANNEL f2 =====
CPDPRG2  waltz16
NUC2     1H
PCPD2    80.00 usec
PL2      -2.00 dB
PL12     16.98 dB
PL13     20.00 dB
SFO2     300.1312005 MHz

F2 - Processing parameters
SI       32768
SF       75.4677663 MHz
WDW      EM
SSB      0
LB       1.00 Hz
GB       0
PC       1.40

```

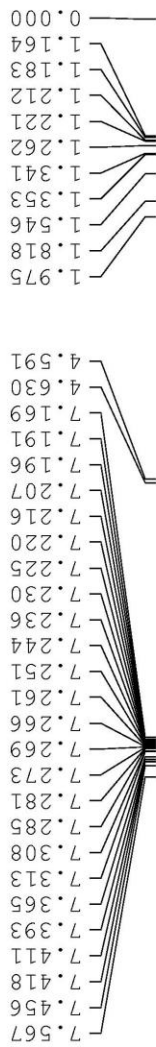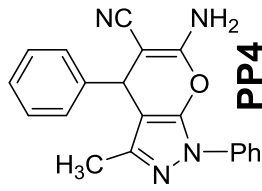

```

Current Data Parameters
NAME      0366B
EXPNO     1
PROCNO    1

F2 - Acquisition Parameters
Date_     20150323
Time      15.28
INSTRUM   spect
PROBHD    5 mm BBO BB-1H
PULPROG   zg30
TD         65536
SOLVENT   CDCl3
NS         16
DS         2
SWH        6188.119 Hz
FIDRES     0.094423 Hz
AQ         5.2953587 sec
RG         322
DE         80.800 usec
TE         300.0 K
D1         1.0000000 sec
TD0        1

===== CHANNEL f1 =====
NUC1       1H
P1         8.60 usec
PL1        -2.00 dB
SFO1       300.1318534 MHz

F2 - Processing parameters
SI         32768
SF         300.1300271 MHz
WDW        EM
SSB        0
LB         0.30 Hz
GB         0
PC         1.00
  
```

Current Data Parameters  
 NAME 1429F  
 EXPNO 1  
 PROCNO 1

F2 - Acquisition Parameters  
 Date\_ 20160224  
 Time 13.11  
 INSTRUM spect  
 PROBHD 5 mm BBO BB-1H  
 PULPROG zgpg30  
 TD 65336  
 SOLVENT CDCl3  
 NS 556  
 DS 4  
 SWH 18028.846 Hz  
 FIDRES 0.275098 Hz  
 AQ 1.8175818 sec  
 RG 256  
 DW 27.733 usec  
 DE 6.00 usec  
 TE 300.0 K  
 D1 2.00000000 sec  
 d11 0.03000000 sec  
 DELTA 1.89999998 sec  
 TD0 1

==== CHANNEL f1 =====  
 NUC1 13C  
 P1 10.00 usec  
 PL1 0.00 dB  
 SFO1 75.4752953 MHz

==== CHANNEL f2 =====  
 CPDPRG2 waltz16  
 NUC2 1H  
 PCPD2 80.00 usec  
 PL2 -2.00 dB  
 PL12 16.98 dB  
 PL13 20.00 dB  
 SFO2 300.1312005 MHz

F2 - Processing parameters  
 SI 32768  
 SF 75.4677688 MHz  
 WDW EM  
 SSB 0  
 LB 1.00 Hz  
 GB 0  
 PC 1.40

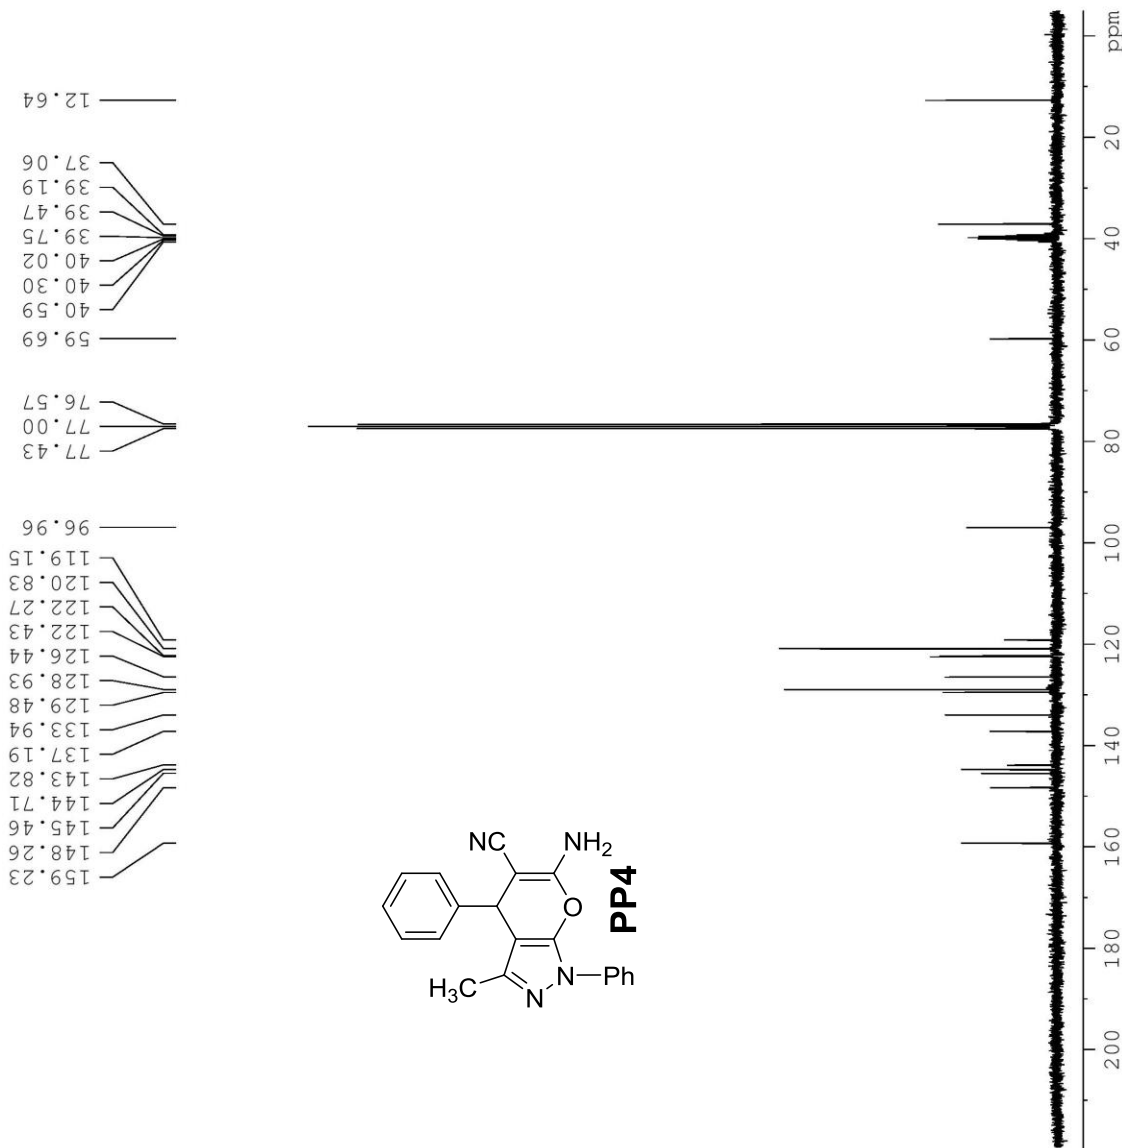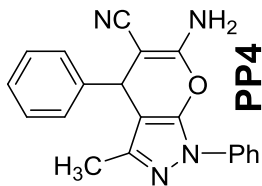

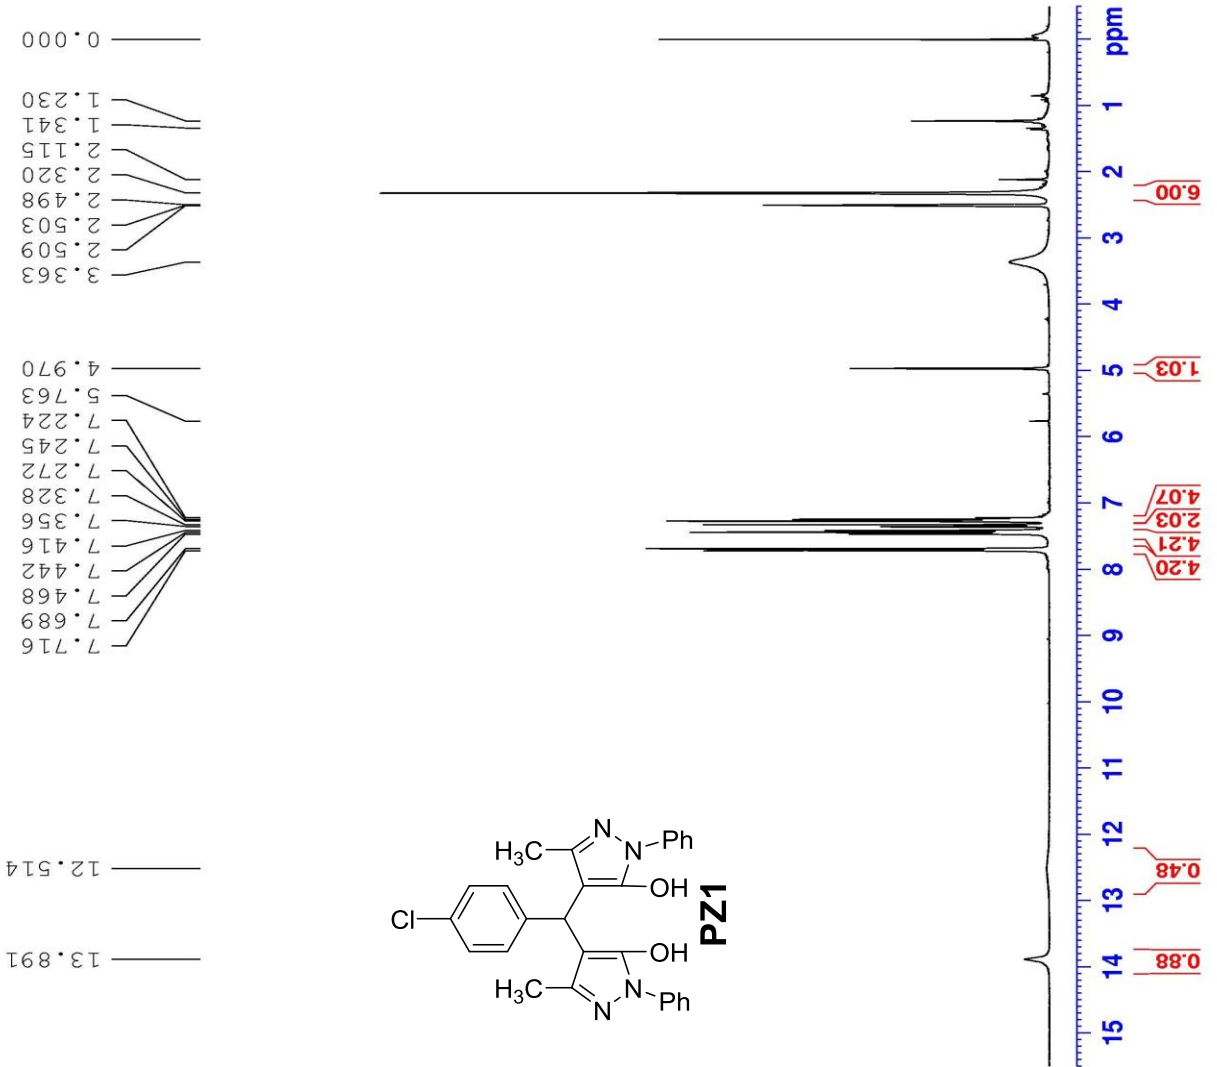

Current Data Parameters  
 NAME 0459C  
 EXPNO 1  
 PROCNO 1

F2 - Acquisition Parameters  
 Date\_ 20150401  
 Time 16.25  
 INSTRUM spect  
 PROBHD 5 mm BBO BB-1H  
 PULPROG zg30  
 TD 65536  
 SOLVENT DMSO  
 NS 16  
 DS 2  
 SWH 6188.119 Hz  
 FIDRES 0.094423 Hz  
 AQ 5.2953587 sec  
 RG 203  
 DM 80.800 usec  
 DE 6.00 usec  
 TE 300.0 K  
 D1 1.0000000 sec  
 TD0 1

===== CHANNEL f1 =====  
 NUC1 1H  
 P1 8.60 usec  
 PL1 -2.00 dB  
 SF01 300.1318534 MHz

F2 - Processing parameters  
 SI 32768  
 SF 300.1300000 MHz  
 WDW EM  
 SSB 0  
 LB 0.30 Hz  
 GB 0  
 PC 1.00

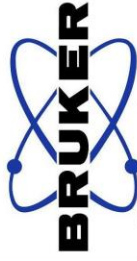

S4 13C NMR

Current Data Parameters  
NAME S4  
EXPNO 2  
PROCNO 1

F2 - Acquisition Parameters  
Date\_ 20160304  
Time 16.37  
INSTRUM spect  
PROBHD 5 mm PABBO BB/  
PULPROG zgpg30  
TD 65536  
SOLVENT DMSO  
NS 512  
DS 4  
SWH 24038.461 Hz  
FIDRES 0.366798 Hz  
AQ 1.3631488 sec  
RG 204.46  
DW 20.800 usec  
DE 6.50 usec  
TE 298.1 K  
D1 2.00000000 sec  
D11 0.03000000 sec  
TD0 1

==== CHANNEL f1 =====  
SFO1 100.6479769 MHz  
NUC1 13C  
P1 10.62 usec  
PLW1 54.00000000 W

==== CHANNEL f2 =====  
SFO2 400.2316009 MHz  
NUC2 1H  
CPDPRG2 waltz16  
PCPD2 90.00 usec  
PLW2 12.00000000 W  
PLW12 0.24083000 W  
PLW13 0.19508000 W

F2 - Processing parameters  
SI 32768  
SF 100.6379135 MHz  
WDW EM  
SSB 0  
LB 2.00 Hz  
GB 0  
PC 1.40

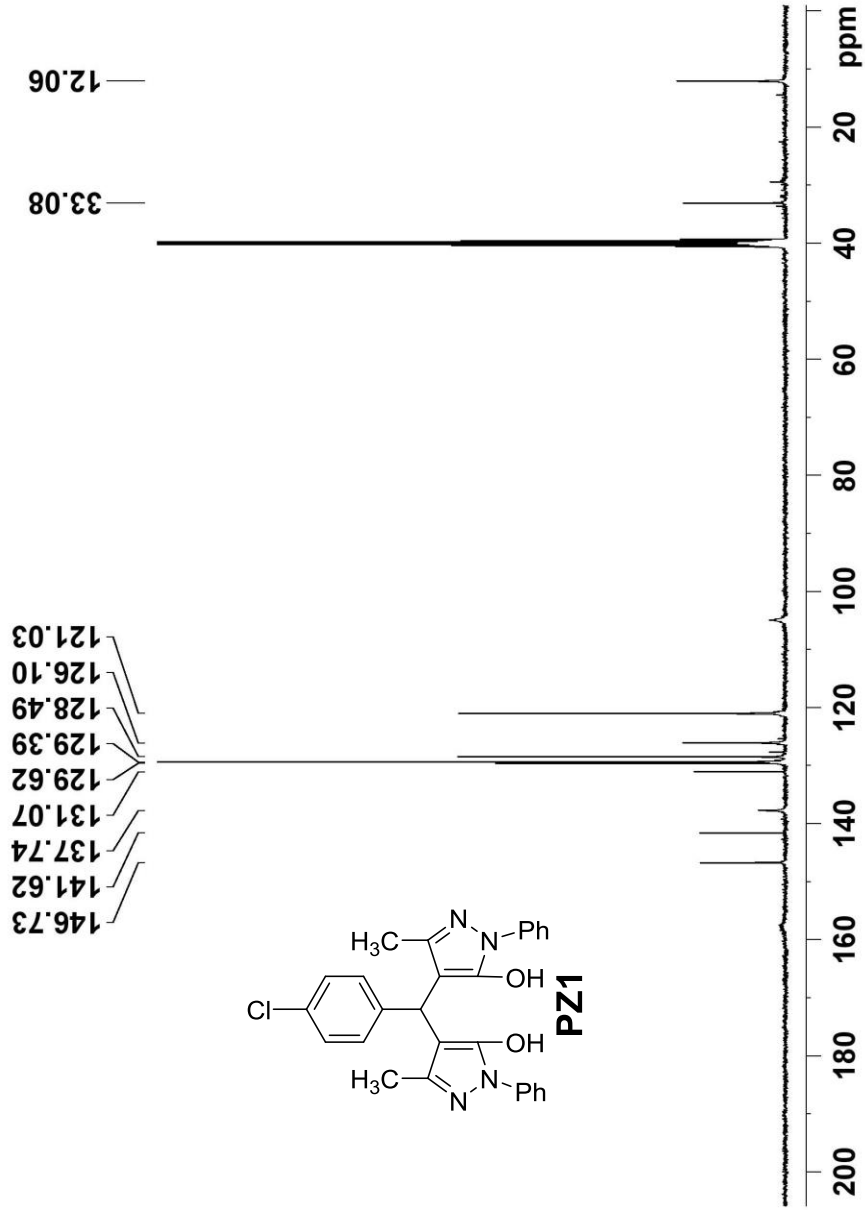

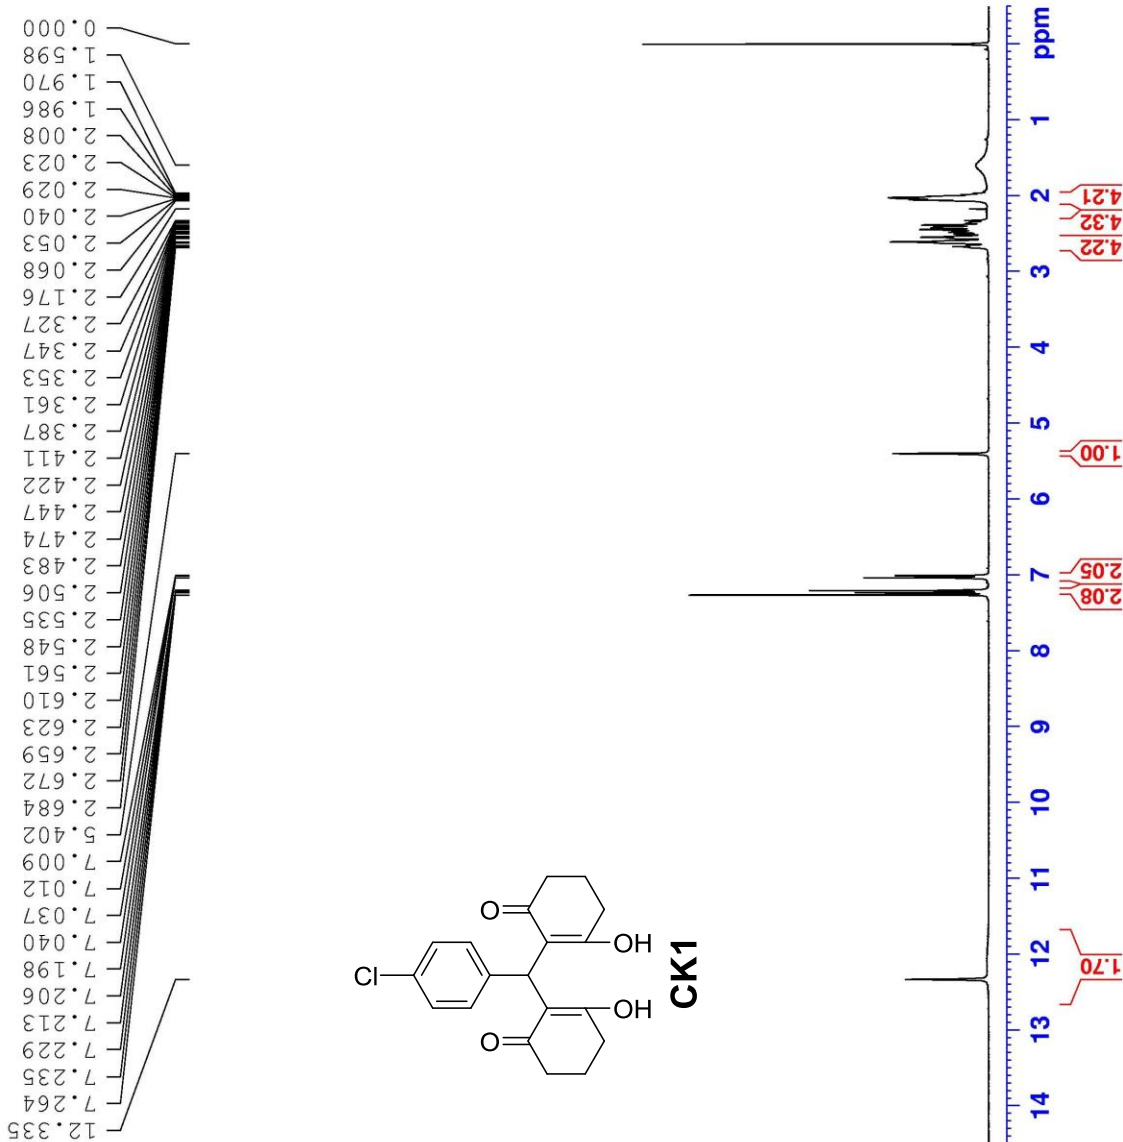

```

Current Data Parameters
NAME      L247P
EXPNO    1
PROCNO   1

F2 - Acquisition Parameters
Date_    20150109
Time     15.17
INSTRUM spect
PROBHD   5 mm BBO BB-1H
PULPROG zg30
TD       65536
SOLVENT  CDCl3
NS       16
DS       2
SWH      6188.119 Hz
FIDRES   0.094423 Hz
AQ       5.2953587 sec
RG       322
DW       80.800 usec
DE       6.00 usec
TE       300.0 K
D1       1.00000000 sec
TD0      1

===== CHANNEL f1 =====
NUC1     1H
P1       8.60 usec
PL1      -2.00 dB
SFO1     300.1318534 MHz

F2 - Processing parameters
SI       32768
SF       300.1300051 MHz
WDW      EM
SSB      0
LB       0.30 Hz
GB       0
PC       1.00
  
```

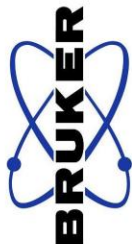

Current Data Parameters  
NAME S1  
EXPNO 2  
PROCNO 1

F2 - Acquisition Parameters  
Date\_ 20160304  
Time 9.54  
INSTRUM spect  
PROBHD 5 mm PABBO BB/  
PULPROG zgpg30  
TD 65536  
SOLVENT DMSO  
NS 512  
DS 4  
SWH 24038.461 Hz  
FIDRES 0.366798 Hz  
AQ 1.3631488 sec  
RG 204.46  
DW 20.800 usec  
DE 6.50 usec  
TE 297.0 K  
D1 2.00000000 sec  
D11 0.03000000 sec  
TDO 1

==== CHANNEL f1 =====  
SFO1 100.6479769 MHz  
NUC1 13C  
P1 10.62 usec  
PLW1 54.0000000 W

==== CHANNEL f2 =====  
SFO2 400.2316009 MHz  
NUC2 1H  
CPDPRG2 waltz16  
PCPD2 90.00 usec  
PLW2 12.0000000 W  
PLW12 0.24083000 W  
PLW13 0.19508000 W

F2 - Processing parameters  
SI 32768  
SF 100.6379135 MHz  
WDW EM  
SSB 0  
LB 2.00 Hz  
GB 0  
PC 1.40

S1 13C NMR

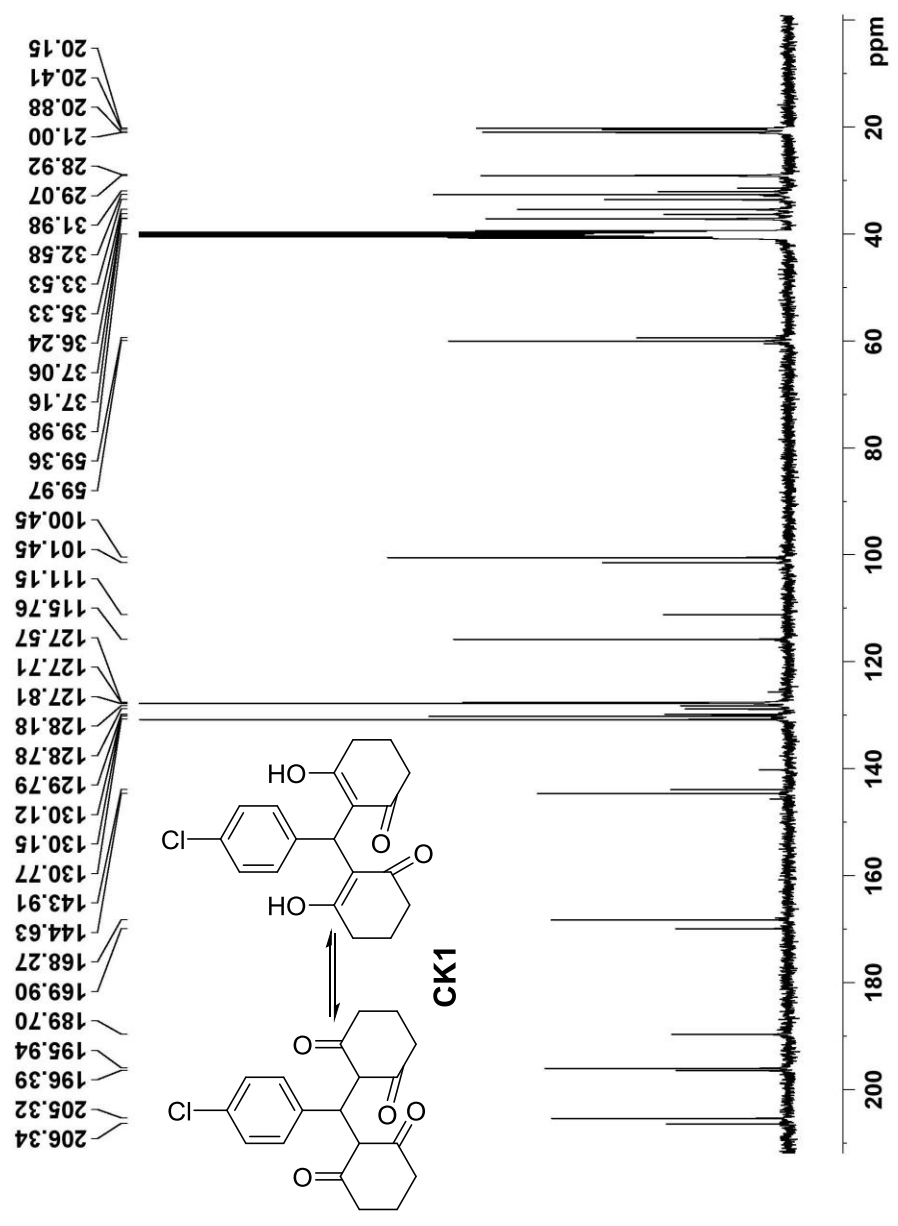



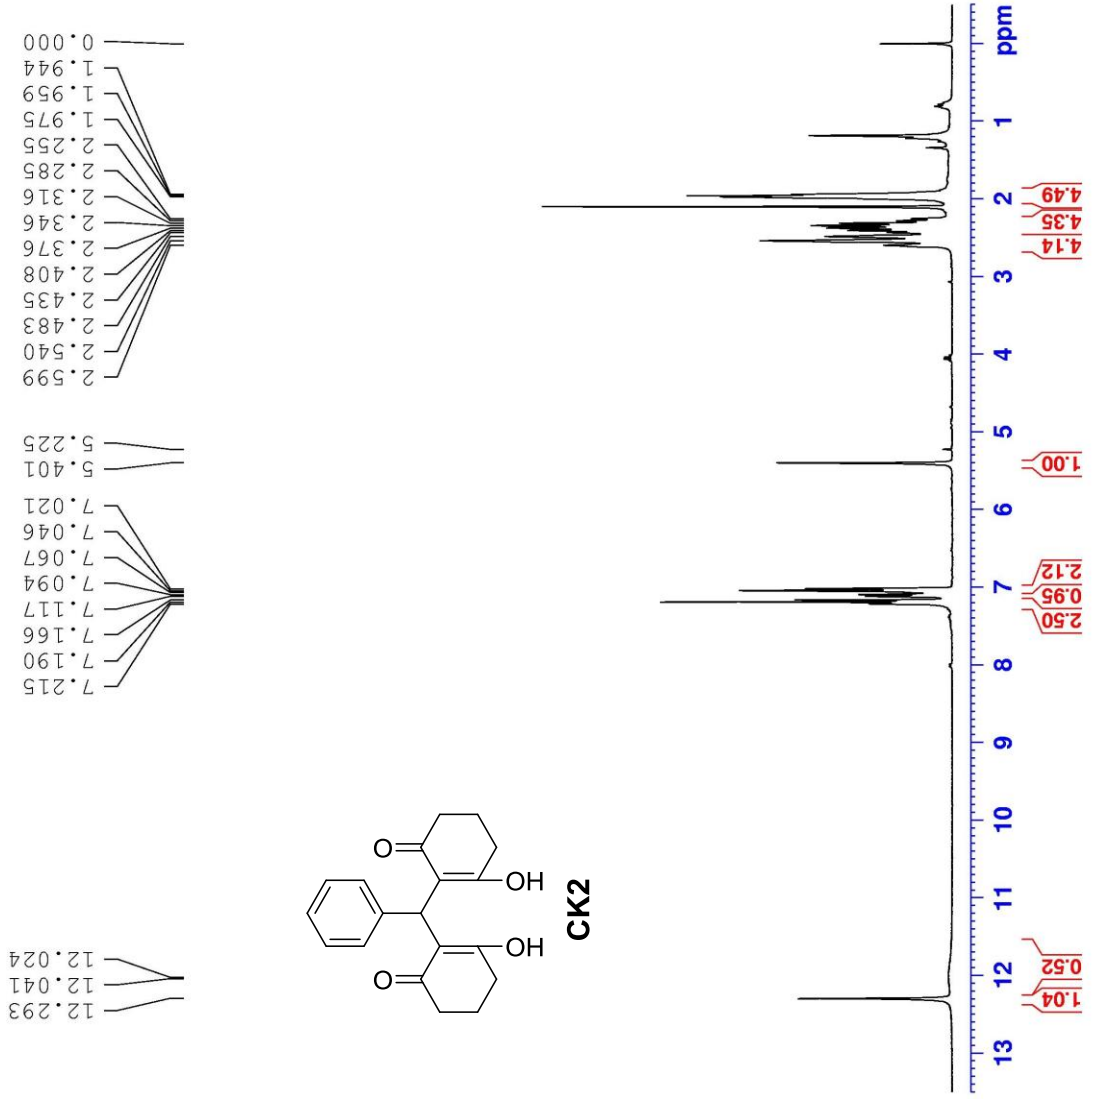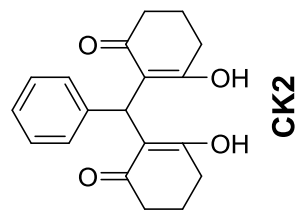

Current Data Parameters  
 NAME 0368F  
 EXPNO 1  
 PROCNO 1

F2 - Acquisition Parameters  
 Date\_ 20150324  
 Time 14.41  
 INSTRUM spect  
 PROBHD 5 mm BBO BB-1H  
 PULPROG zg30  
 TD 65536  
 SOLVENT CDCl3  
 NS 16  
 DS 2  
 SWH 6188.119 Hz  
 FIDRES 0.1094423 Hz  
 AQ 5.2953587 sec  
 RG 181  
 DW 80.800 usec  
 DE 6.00 usec  
 TE 300.0 K  
 D1 1.00000000 sec  
 TDO 1

===== CHANNEL f1 =====  
 NUC1 1H  
 P1 8.60 usec  
 PL1 -2.00 dB  
 SF01 300.1318534 MHz

F2 - Processing parameters  
 SI 32768  
 SF 300.1300269 MHz  
 WDW EM  
 SSB 0  
 LB 0.30 Hz  
 GB 0  
 PC 1.00

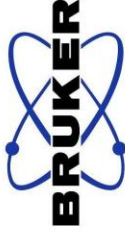

```

Current Data Parameters
NAME S2
EXPNO 2
PROCNO 1

F2 - Acquisition Parameters
Date_ 20160304
Time 10.45
INSTRUM spect
PROBHD 5 mm PABBO BB/
PULPROG zgpg30
TD 65536
SOLVENT CDCl3
NS 512
DS 4
SWH 24038.461 Hz
FIDRES 0.366798 Hz
AQ 1.3631488 sec
RG 204.46
DW 20.800 usec
DE 6.50 usec
TE 297.5 K
D1 2.00000000 sec
D11 0.03000000 sec
TD0 1

===== CHANNEL f1 =====
SFO1 100.6479769 MHz
NUC1 13C
P1 10.62 usec
PLW1 54.00000000 W

===== CHANNEL f2 =====
SFO2 400.2316009 MHz
NUC2 1H
CPDPRG2 waltz16
PCPD2 90.00 usec
PLW2 12.00000000 W
PLW12 0.24083000 W
PLW13 0.19568000 W

F2 - Processing parameters
SI 32768
SF 100.6393904 MHz
WDW EIM
SSB 0
LB 2.00 Hz
GB 0
PC 1.40
  
```

S2 13C NMR

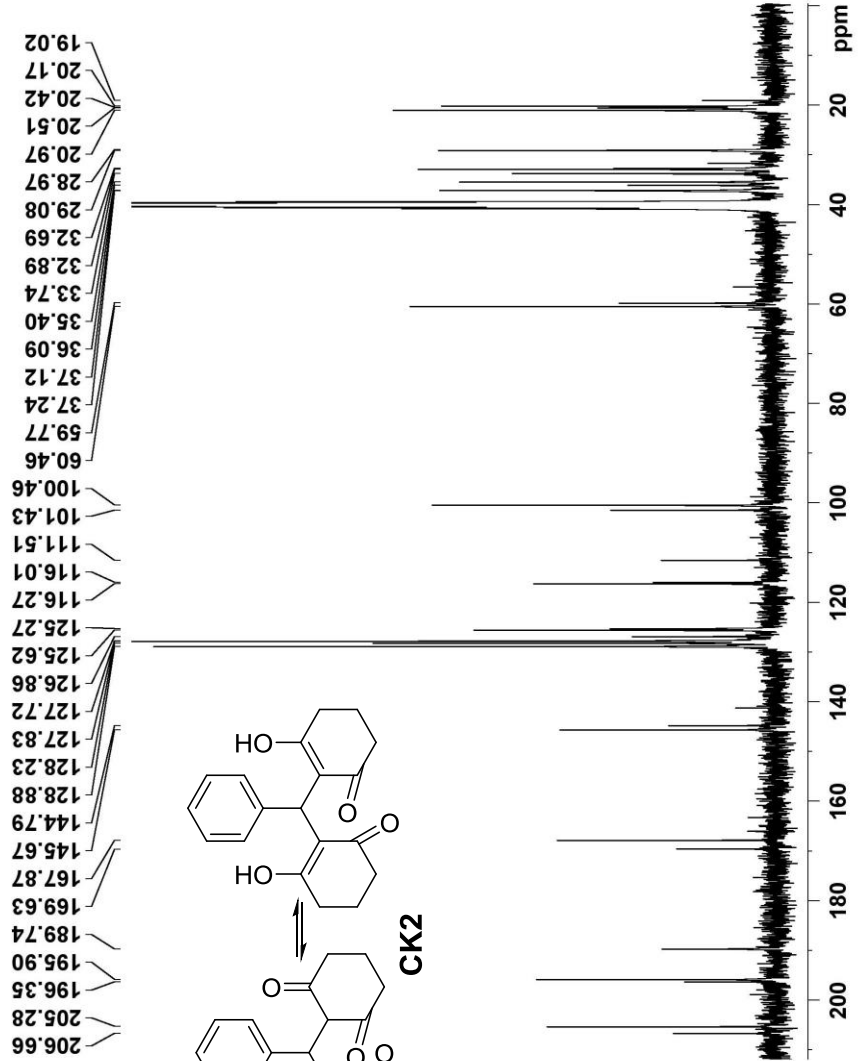

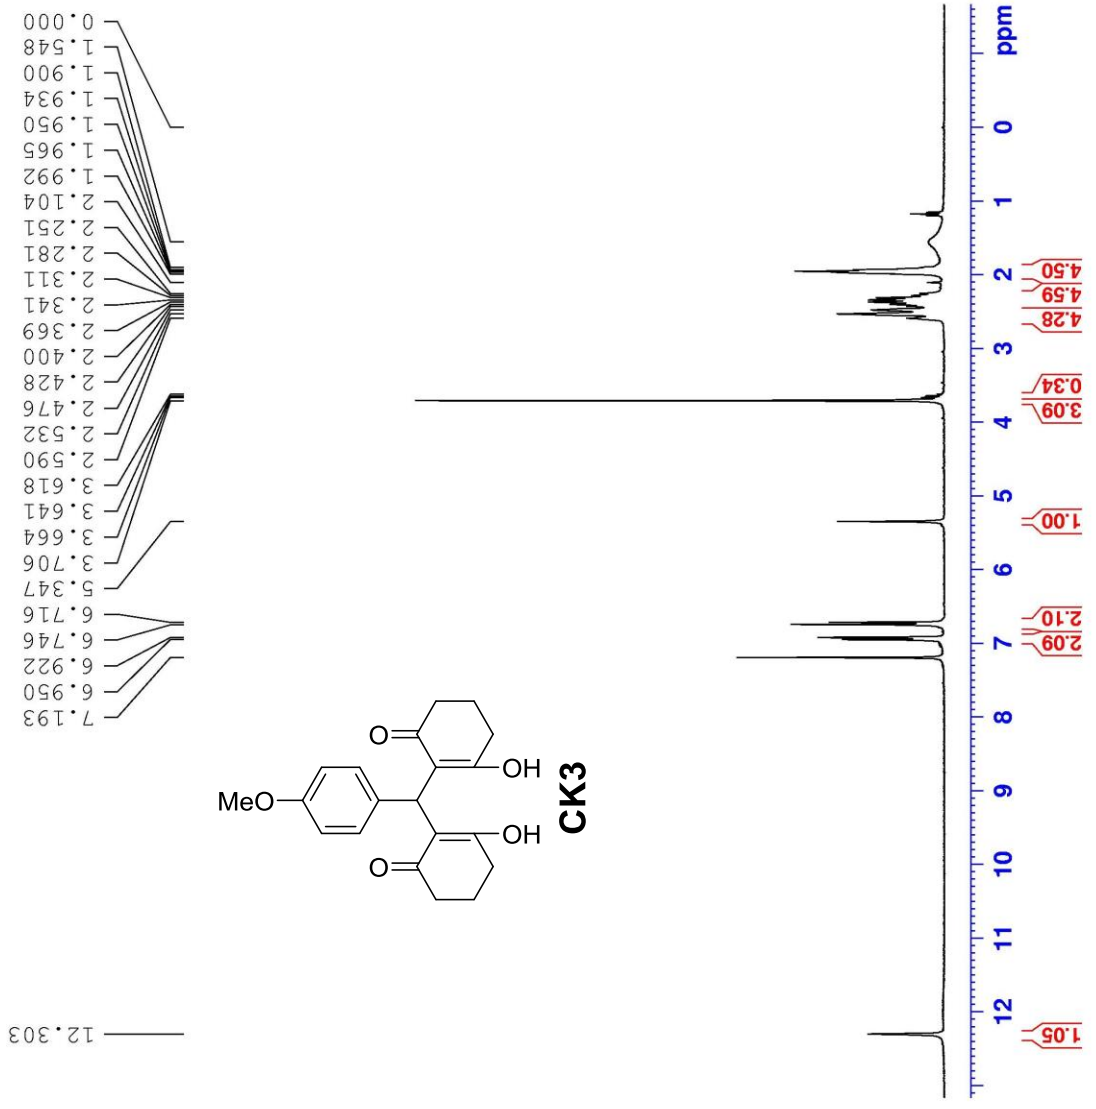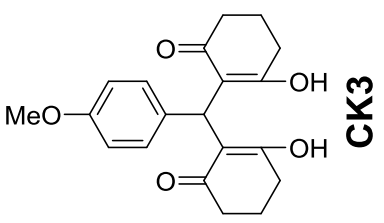

Current Data Parameters  
 NAME 0368H  
 EXPNO 1  
 PROCNO 1

F2 - Acquisition Parameters  
 Date\_ 20150325  
 Time 16.12  
 INSTRUM spect  
 PROBHD 5 mm BBO BB-1H  
 PULPROG zg30  
 TD 65536  
 SOLVENT CDCl3  
 NS 16  
 DS 2  
 SWH 6188.119 Hz  
 FIDRES 0.1094423 Hz  
 AQ 5.2953587 sec  
 RG 362  
 DW 80.800 usec  
 DE 6.00 usec  
 TE 300.0 K  
 D1 1.00000000 sec  
 TDO 1

===== CHANNEL f1 =====  
 NUC1 1H  
 P1 8.60 usec  
 PL1 -2.00 dB  
 SFO1 300.1318534 MHz

F2 - Processing parameters  
 SI 32768  
 SF 300.1300262 MHz  
 WDW EM  
 SSB 0  
 LB 0.30 Hz  
 GB 0  
 PC 1.00

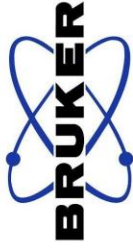

S3 13C NMR

Current Data Parameters  
 NAME S3  
 EXPNO 2  
 PROCNO 1

F2 - Acquisition Parameters  
 Date\_ 20160304  
 Time 15.57  
 INSTRUM spect  
 PROBHD 5 mm PABBO BB/  
 PULPROG zgpg30  
 TD 65536  
 SOLVENT DMSO  
 NS 512  
 DS 4  
 SWH 24038.461 Hz  
 FIDRES 0.366798 Hz  
 AQ 1.3631488 sec  
 RG 204.46  
 DW 20.800 usec  
 DE 6.50 usec  
 TE 297.5 K  
 D1 2.0000000 sec  
 D11 0.0300000 sec  
 TD0 1

==== CHANNEL f1 =====  
 SFO1 100.6479769 MHz  
 NUC1 13C  
 P1 10.62 usec  
 PLW1 54.0000000 W

==== CHANNEL f2 =====  
 SFO2 400.2316009 MHz  
 NUC2 1H  
 CPDPRG2 waltz16  
 PCPD2 90.00 usec  
 PLW2 12.0000000 W  
 PLW12 0.24083000 W  
 PLW13 0.19508000 W

F2 - Processing parameters  
 SI 32768  
 SF 100.6379135 MHz  
 WDW EM  
 SSB 0 2.00 Hz  
 LB 0  
 GB 0  
 PC 1.40

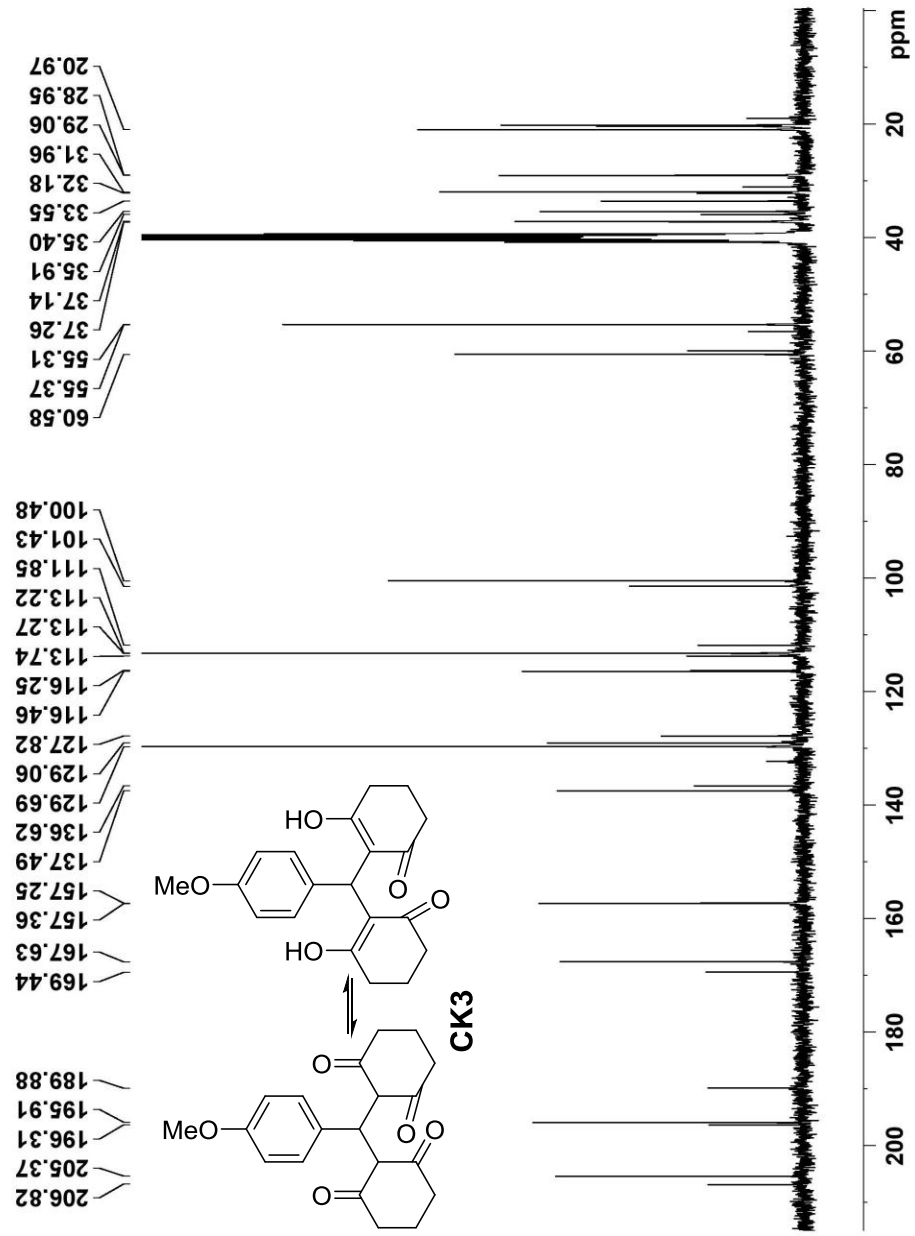

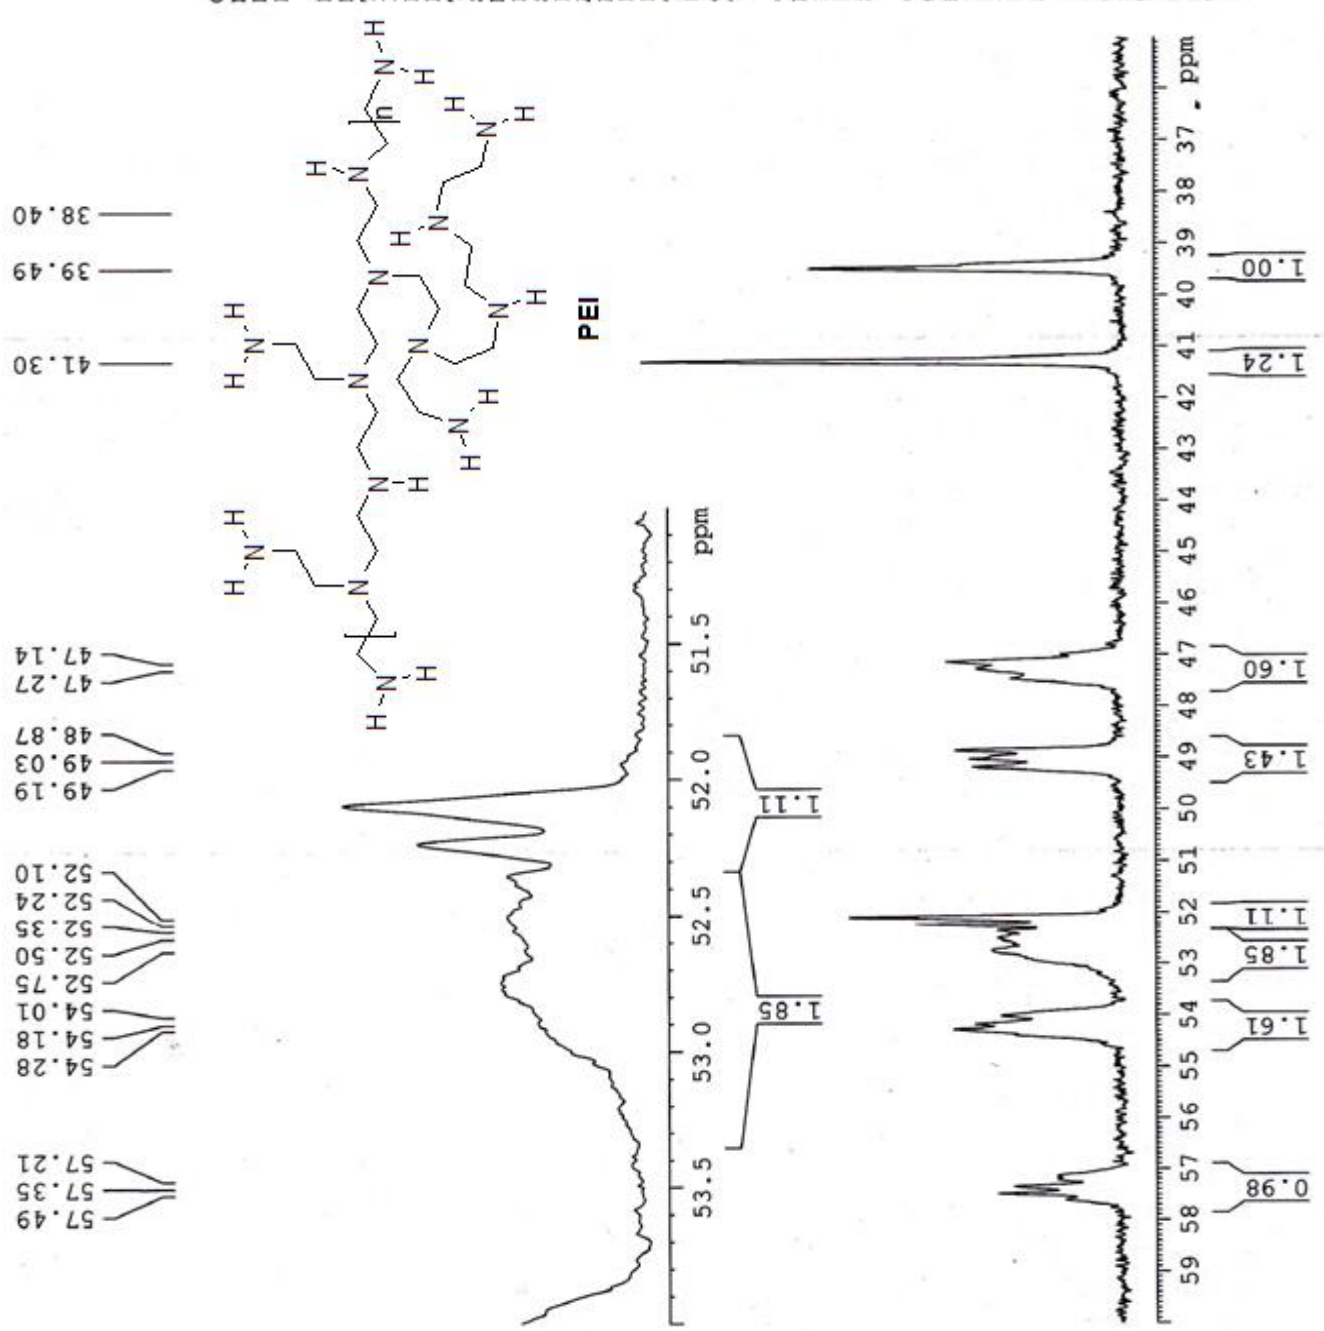

Current Data Parameters  
 NAME 1235E2  
 EXPNO 1  
 PROCNO 1

F2 - Acquisition Parameters  
 Date\_ 20150313  
 Time 14.02  
 INSTRUM spect  
 PROBD 5 mm BBO BB-1H  
 PULPROG zgpg30  
 TD 65536  
 SOLVENT CDC13  
 NS 1356  
 DS 4  
 SWH 18028.846 Hz  
 FIDRES 0.275098 Hz  
 AQ 1.8175818 sec  
 RG 406  
 DW 27.733 usec  
 DE 6.00 usec  
 TE 300.0 K  
 D1 2.00000000 sec  
 d11 0.03000000 sec  
 TD0 1

CHANNEL f1  
 NUC1 13C  
 P1 9.50 usec  
 PL1 0.00 dB  
 SFO1 75.4752953 MHz

CHANNEL f2  
 CPDPRG2 waitz16  
 NUC2 1H  
 P2 80.00 usec  
 PL2 -2.00 dB  
 PL12 17.37 dB  
 SFO2 300.1312005 MHz

F2 - Processing parameters  
 SI 32768  
 SF 75.4677490 MHz  
 WDW EM  
 SSB 0  
 LB 1.00 Hz  
 GB 0  
 PC 1.40

F





**Table S2:** Heterocyclic ring derivatives identified by docking with NorA homologue MFS

| <b>S. No.</b> | <b>Compound ID</b> | <b>Binding Energy (kcal/mol)</b> |
|---------------|--------------------|----------------------------------|
| 1             | BC6                | -11.59                           |
| 2             | BC1                | -11.23                           |
| 3             | BC9                | -11.22                           |
| 4             | BC2                | -10.56                           |
| 5             | BC3                | -10.18                           |
| 6             | CK1                | -9.56                            |
| 7             | CK3                | -9.29                            |
| 8             | BC4                | -9.22                            |
| 9             | BC7                | -9.12                            |
| 10            | BC8                | -9.1                             |
| 11            | PP3                | -8.88                            |
| 12            | PP2                | -8.79                            |
| 13            | PP1                | -8.76                            |
| 14            | PP4                | -8.72                            |
| 15            | PZ1                | -8.69                            |
| 16            | CK2                | -8.2                             |
| 17            | BC5                | -8.01                            |

**Table S3:** Anti staphylococcal effect of Heterocyclic ring derivatives against *S.aureus* (SA-1199B)

| <b>Compounds</b> | <b>MIC (<math>\mu\text{g/ml}</math>)</b> |
|------------------|------------------------------------------|
| CK1              | > 64                                     |
| BC1              | > 64                                     |
| BC9              | > 64                                     |
| BC2              | > 64                                     |
| BC3              | 64                                       |
| BC6              | 64                                       |
| CK2              | > 64                                     |
| BC5              | > 64                                     |
| PZ1              | > 64                                     |



**Table S4:** Mortality based toxicity assessment of Zebra Fish exposed to chosen putative EPIs

| <b>Compound</b>        | <b>Conc.*<br/>µg/ml</b> | <b>No. of fishes alive after<br/>24hrs</b> | <b>% survival</b> |
|------------------------|-------------------------|--------------------------------------------|-------------------|
| <b>BC1<sup>#</sup></b> | 16                      | 3                                          | 100               |
| <b>BC2</b>             | 16                      | 1                                          | 33.33             |
| <b>BC3</b>             | 16                      | 1                                          | 33.33             |
| <b>BC6<sup>#</sup></b> | 16                      | 3                                          | 100               |
| <b>BC9</b>             | 16                      | 3                                          | 100               |

**\*indicates double dose;**

**# indicates the compound was sparingly soluble**

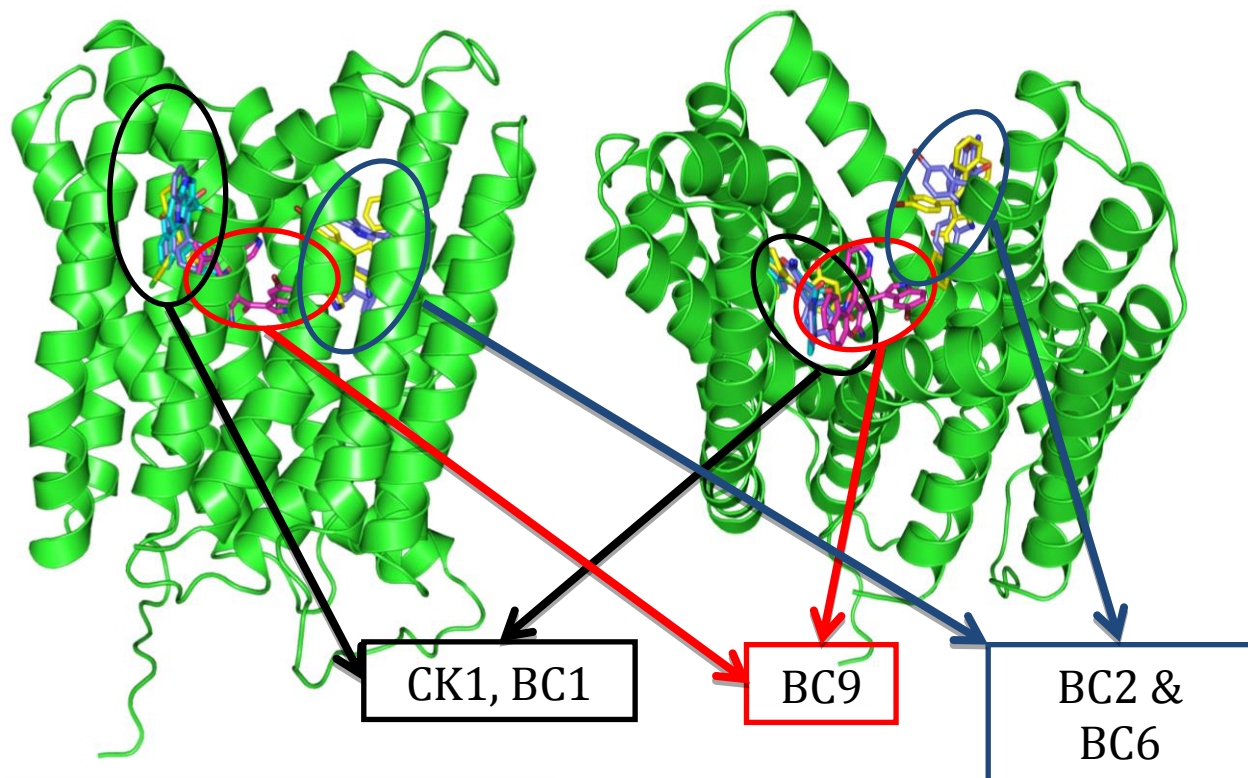

**Figure S1:** Figure showing the three different binding sites and with the ligands bound in the respective binding sites.

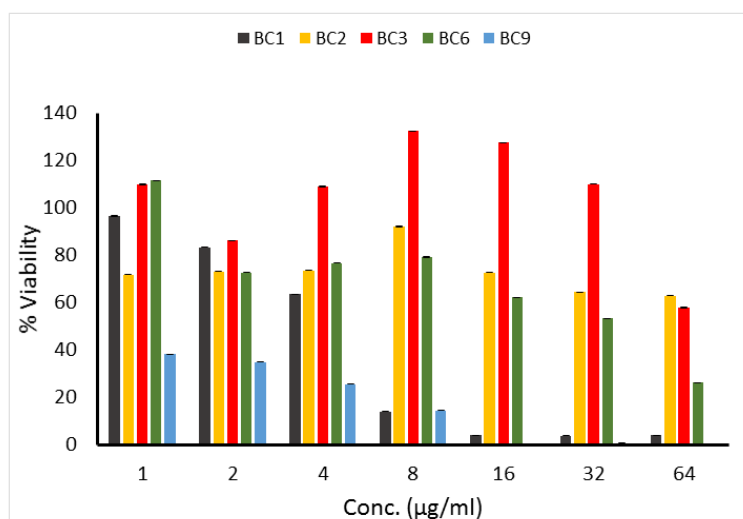

**Figure S2: Effect of BC series of compounds on Cell Viability**

Pancreatic cell line was treated with BC series compounds at varying concentration (1-64µg/ml) for 24h and cell viability was measured by MTT assay

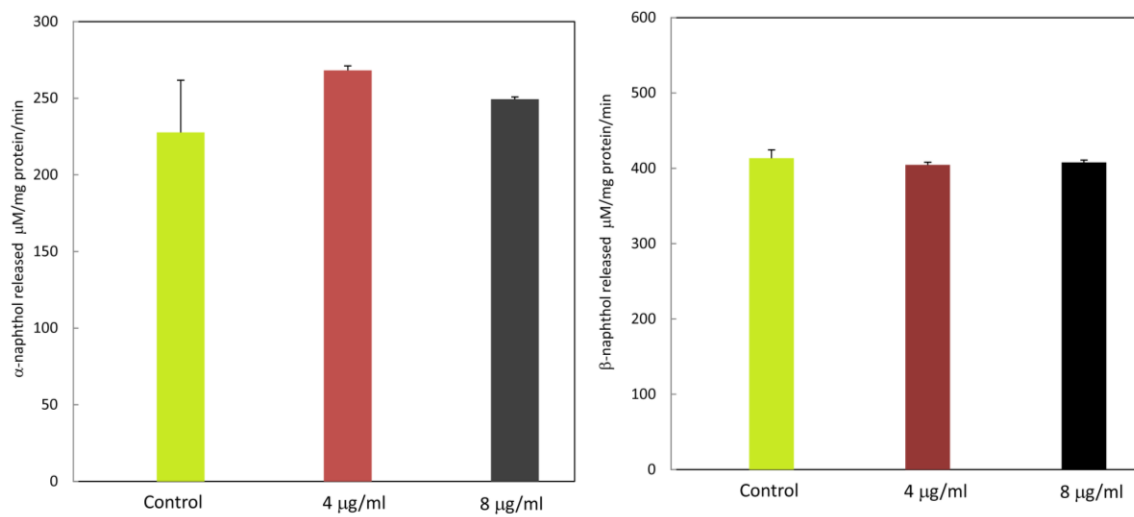

**Figure S3.1:** Effect of compound BC9 on the activity of liver carboxylesterase in zebra fish. Each bar represents mean  $\pm$  SD of 5 determinations in duplicates using liver samples pooled from two fishes. The difference between the exposed and control fish were not observed to be significant.

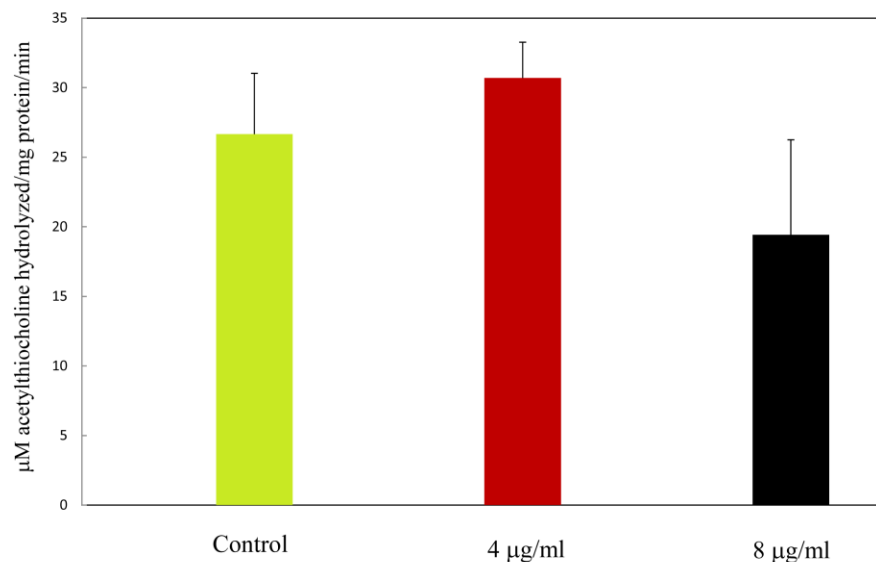

**Figure S3.2:** Effect of compound BC9 on the activity of brain acetylcholinesterase in zebrafish. Each bar represents mean $\pm$ SD of 5 determinations in duplicates using liver samples pooled from two fishes. Though there was a decrease in acetylcholinesterase activity in zebrafish exposed to 8mg/ml, this was not statistically significant ( $p < 0.05$ ).

## References

1. S. S. Ganesan, A. Ganesan, and J. Kothandapani, *Synlett*, 2014, **25**, 1847-1850.
2. H. Liu, Z. Shen, S.-E. Stiriba, Y. Chen, W. Zhang and L. WEI. *J. Polym. Sci. A Polym. Chem.* 2006, **44**, 4165–4173.
3. R. H. nia, M. Mamaghani, K. Tabatabaieian, F. Shirini and M Rassa. *Bioorg. Med. Chem. Lett.* 2012, **22**, 5956–5960.
4. T.-S. Jin, A.-Q. Wang, Z.-L. Cheng, J.-S. Zhang and T.-S. Li. *Synth. Commun.* 2005, **35**, 137-143.
5. (a) J.-J. Yu, L.-M. Wang, J.-Q. Liu, F.-L. Guo, Y. Liu and N. Jiao *Green Chem.*, 2010, **12**, 216-219. (b)V.K. Rao, M.M. Kumar, and A.Kumar. *Indian J. Chem.* 2011, **50B**, 1128-1135.
6. Z. Zhou and Y. Zhang. *Green Chem. Lett. Rev.* 2014, **7**, 18-23.
7. J. M. Andrews. *J. Antimicrob. Chemother.* 2001, **48**, 5-16.
8. F. C. Odds. *J. Antimicrob. Chemother.* 2003, **52**, 1.
9. L. R. Marks , E. A. Clementi and A. P. *PLoS One*, 2013, **8** , e63158.
10. S. Wu and Y. Zhang. *Proteins* 2008, **72**, 547-56.
11. G. M. Morris, D. S. Goodsell, R. S. Halliday, R. Huey, W. E. Hart, R. K. Belew and A. J. Olson *J. Comput. Chem.* 1998, **19**, 1639-1662.
12. M.Westerfield. *The zebrafish book: guide for the laboratory use of zebrafish (Danio rerio)*,. 3 ed.; University of Oregon Press,,: Eugene, **1995**.
13. O. H. Lowry, N. J. Rosebrough, A. L.Farr, and R. J. Randall. *J.Biol.Chem* 1951, **193**, 265-75.
14. J. A. Argentine and A.A. James. *Insect. Biochem. Mol. Biol.* 1995, **25**, 621-30.
15. P. Edman, *Arch Biochem.* 1949, **22**,475.
